# Supplementary material for: DIC–borane-catalyzed selective methylation of primary amines with CO2 using boranes as reducing agents
Source: Royal Society of Chemistry journal article supplement (doi:10.1039/d3qo00058c), 2023-01-01

## Supporting Information

### DIC–Borane-Catalyzed Selective Methylation of Primary Amines with CO<sub>2</sub> Using Boranes as Reducing Agents

He Zhang, Yanmeng Zhang, Ke Gao\*

Hubei International Scientific and Technological Cooperation Base of Pesticide and Green Synthesis, Key Laboratory of Pesticide & Chemical Biology, Ministry of Education, College of Chemistry, Central China Normal University, 152 Luoyu Road, Wuhan, Hubei 430079, P. R. China.

#### Table of Contents

|                                                         |     |
|---------------------------------------------------------|-----|
| 1. General Information.....                             | S1  |
| 2. Solvent screening.....                               | S1  |
| 3. General Procedure and Spectral Data of Products..... | S2  |
| 4. Gram-Scale Reaction.....                             | S19 |
| 5. Mechanistic Studies.....                             | S21 |
| 6. References.....                                      | S25 |
| 7. <sup>1</sup> H and <sup>13</sup> C NMR Spectra.....  | S27 |

## 1. General Information.

Unless otherwise noted, materials were purchased from Adamas, Energy-Chemical, and other commercial suppliers and were used as received. Flash column chromatography was performed using 200-300 mesh silica gel.  $^1\text{H}$  and  $^{13}\text{C}$  nuclear magnetic resonance (NMR) spectra were recorded on VARIAN-400 (400 MHz) or Bruker AV-400 (400 MHz) NMR spectrometers. Chemical shifts ( $\delta$ ) are reported in ppm from the resonance of tetramethyl silane as the internal standard (TMS: 0.00 ppm). Data are reported as follows: chemical shift, multiplicity (s = singlet, d = doublet, t = triplet, q = quartet, m = multiplet), coupling constants (Hz) and integration. Gas chromatographic (GC) analysis was performed on a Shimadzu GC-2010 system equipped with an FID detector and a capillary column, and the tridecane as the internal standard. High-resolution mass spectra (HRMS) were obtained with a MICROTOF-10454 Premier LC HR mass spectrometer.

## 2. Solvent screening.

Table S1. Solvent screening for mono-methylation.<sup>a</sup>

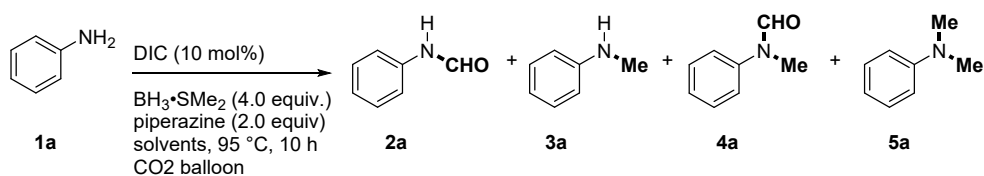

| Entry | Solvent     | Yield of<br>2a/% | Yield of<br>3a/% | Yield of<br>4a/% | Yield of<br>5a/% |
|-------|-------------|------------------|------------------|------------------|------------------|
| 1     | Toluene     | -                | 86               | -                | -                |
| 2     | Glyme       | -                | -                | -                | -                |
| 3     | 1,4-dioxane | -                | 56               | -                | -                |
| 4     | DCE         | -                | -                | -                | -                |
| 5     | THF         | 35               | -                | -                | -                |

<sup>a</sup> Condition: PhNH<sub>2</sub> (0.3 mmol), BH<sub>3</sub>·SMe<sub>2</sub> (4.0 equiv.), DIC (10 mol%), solvent (0.4 mL), piperazine (2.0 equiv.), 95 °C, 10 h.

Table S2. Solvent screening for di-methylation.<sup>a</sup>

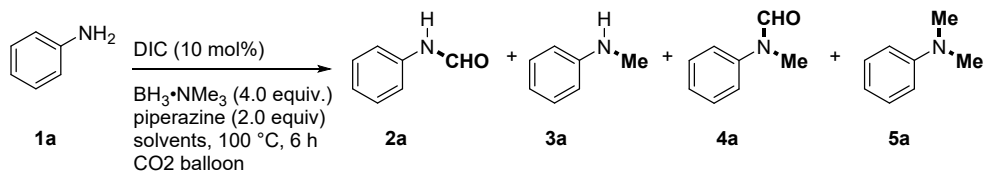

| Entry | Solvent     | Yield of<br>2a/% | Yield of<br>3a/% | Yield of<br>4a/% | Yield of<br>5a/% |
|-------|-------------|------------------|------------------|------------------|------------------|
| 1     | Toluene     | 28               | 26               | 23               | 21               |
| 2     | Glyme       | -                | -                | -                | 95               |
| 3     | 1,4-dioxane | 2                | 2                | 4                | 67               |
| 4     | DCE         | -                | 4                | -                | 55               |
| 5     | THF         | 3                | 7                | 5                | 52               |

<sup>a</sup> Condition: PhNH<sub>2</sub> (0.3 mmol), BH<sub>3</sub>·NMe<sub>3</sub> (4.0 equiv.), DIC (10 mol%), solvent (0.2 mL), 100 °C, 6 h.

### 3. General Procedure and Spectral Data of Products.

#### 3.1 General Procedure for Synthesis of *N*-Methylaniline.

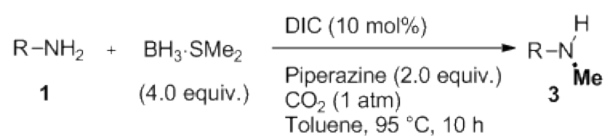

In a Schlenk tube was placed aniline (0.3 mmol), piperazine (51.7 mg, 0.6 mmol), BH<sub>3</sub>·SMe<sub>2</sub> (120.0 μL, 10 mol/L, 1.2 mmol), *N,N'*-diisopropylcarbodiimide (3.7 mg, 0.03 mmol), toluene (0.4 mL). The resulting mixture was stirred with a CO<sub>2</sub> balloon at 95 °C for 10 h, and then allowed to room temperature. The reaction was quenched by saturated aqueous NaCl (1 mL). The aqueous layer was extracted with EtOAc (2 mL x

3). The combined organic layers were dried over  $\text{MgSO}_4$  and concentrated under reduced pressure. The crude product was purified by column chromatography (silica gel, EtOAc/PE).

#### ***N*,4-Dimethylaniline (3b)**

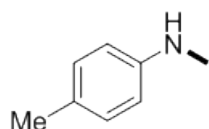

The typical procedure was applied to *p*-toluidine (32.1 mg, 0.3 mmol). Yield: 21.8 mg, 60 %, brown oil,  $R_f = 0.7$  (PE/EtOAc = 10/1); purified by column chromatography eluting with PE/EtOAc (30:1).

$^1\text{H}$  NMR ( $\text{CDCl}_3$ , 400 MHz):  $\delta$  7.24 (d,  $J = 8.0$  Hz, 2H), 6.74 (d,  $J = 8.0$  Hz, 2H), 3.64 (br, 1H), 2.98 (s, 3H), 2.48 (s, 3H).  $^{13}\text{C}$  NMR ( $\text{CDCl}_3$ , 100 MHz):  $\delta$  147.0, 129.5, 126.1, 112.4, 30.8, 20.2. The physical and spectral data were consistent with those previously reported.<sup>1</sup>

#### **4-Ethyl-*N*-methylaniline (3c)**

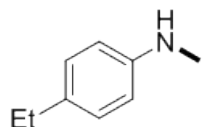

The typical procedure was applied to 4-ethylaniline (36.4 mg, 0.3 mmol). Yield: 26.8 mg, 66 %, yellow oil;  $R_f = 0.8$  (PE/EtOAc = 10/1); purified by column chromatography eluting with PE/EtOAc (20:1),

$^1\text{H}$  NMR ( $\text{CDCl}_3$ , 400 MHz):  $\delta$  7.05 (d,  $J = 8.0$  Hz, 2H), 6.59 (d,  $J = 8.0$  Hz, 2H), 3.36 (br, 1H), 2.84 (s, 3H), 2.57 (q,  $J = 7.6$  Hz, 2H), 1.21 (t,  $J = 7.6$  Hz, 3H).  $^{13}\text{C}$  NMR ( $\text{CDCl}_3$ , 100 MHz):  $\delta$  147.3, 133.1, 128.5, 112.6, 31.0, 27.9, 16.0. The physical and spectral data were consistent with those previously reported.<sup>2</sup>

#### **4-(*tert*-Butyl)-*N*-methylaniline (3d)**

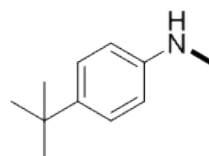

The typical procedure was applied to 4-(*tert*-butyl)aniline (44.8 mg, 0.3 mmol). Yield: 26.6 mg, 54 %, yellow oil;  $R_f = 0.9$  (PE/EtOAc = 10/1); purified by column chromatography eluting with PE/EtOAc

(30:1),  $^1\text{H}$  NMR ( $\text{CDCl}_3$ , 400 MHz):  $\delta$  7.23 (d,  $J = 8.0$  Hz, 2H), 6.59 (d,  $J = 8.0$  Hz, 2H), 3.58 (br, 1H), 2.83 (s, 3H), 1.29 (s, 9H).  $^{13}\text{C}$  NMR ( $\text{CDCl}_3$ , 100 MHz):  $\delta$  147.0,

140.1, 126.0, 112.2, 33.9, 31.6, 31.0. The physical and spectral data were consistent with those previously reported.<sup>2</sup>

#### 4-Methoxy-*N*-methylaniline (3e)

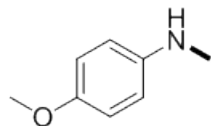

The typical procedure was applied to 4-methoxyaniline (37.0 mg, 0.3 mmol). Yield: 29.0 mg, 71 %, yellow oil;  $R_f = 0.7$  (PE/EtOAc = 10/1); purified by column chromatography eluting with PE/EtOAc (30:1), <sup>1</sup>H NMR (CDCl<sub>3</sub>, 400 MHz):  $\delta$  6.81 (d,  $J = 8.0$  Hz, 2H), 6.60 (d,  $J = 8.0$  Hz, 2H), 3.76 (s, 3H), 3.09 (br, 1H) 2.81 (s, 3H). <sup>13</sup>C NMR (CDCl<sub>3</sub>, 100 MHz):  $\delta$  152.0, 143.7, 114.9, 113.6, 55.8, 31.6. The physical and spectral data were consistent with those previously reported.<sup>3</sup>

#### *N*-Methyl-4-(methylthio)aniline (3f)

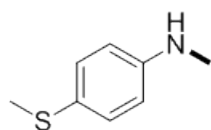

The typical procedure was applied to 4-(methylthio)aniline (41.8 mg, 0.3 mmol). Yield: 19.4 mg, 42 %, yellow oil,  $R_f = 0.7$  (PE/EtOAc = 10/1); purified by column chromatography eluting with PE/EtOAc (30:1). <sup>1</sup>H NMR (CDCl<sub>3</sub>, 400 MHz):  $\delta$  7.24 (d,  $J = 8.0$  Hz, 2H), 6.56 (d,  $J = 8.0$  Hz, 2H), 3.65 (br, 1H), 2.83 (s, 3H), 2.41 (s, 3H). <sup>13</sup>C NMR (CDCl<sub>3</sub>, 100 MHz):  $\delta$  148.2, 131.6, 124.0, 112.9, 30.7, 19.3. The physical and spectral data were consistent with those previously reported.<sup>4</sup>

#### *N*<sup>1</sup>,*N*<sup>1</sup>,*N*<sup>4</sup>-Trimethylbenzene-1,4-diamine (3g)

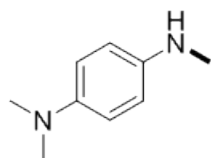

The typical procedure was applied to *N*<sup>1</sup>,*N*<sup>1</sup>-dimethylbenzene-1,4-diamine (40.9 mg, 0.3 mmol). Yield: 25.7 mg, 57 %, brown oil;  $R_f = 0.5$  (PE/EtOAc = 5/1); purified by column chromatography eluting with PE/EtOAc (5:1), <sup>1</sup>H NMR (DMSO-*d*<sub>6</sub>, 400 MHz): <sup>1</sup>H NMR (400 MHz, DMSO-*d*<sub>6</sub>):  $\delta$  6.64 (d,  $J = 8.0$  Hz, 2H), 6.46 (d,  $J = 8.0$  Hz, 2H), 4.95 (br, 1H), 2.70 (s, 6H), 2.60 (s, 3H). <sup>13</sup>C NMR (DMSO-*d*<sub>6</sub>, 100 MHz):  $\delta$  142.8, 142.6, 115.5, 112.8, 42.0, 30.7. The physical and spectral data were consistent with those previously reported.<sup>5</sup>

#### 4-Fluoro-*N*-methylaniline (3h)

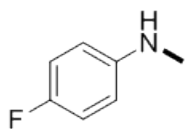

The typical procedure was applied to 4-fluoroaniline (33.3 mg, 0.3 mmol). Yield: 23.3 mg, 62%, yellow oil;  $R_f = 0.7$  (PE/EtOAc = 10/1); purified by column chromatography eluting with PE/EtOAc (30:1).  $^1\text{H}$  NMR ( $\text{CDCl}_3$ , 400 MHz):  $\delta$  6.91 (t,  $J = 8.0$  Hz, 2H), 6.54 (dd,  $J = 8.0, 4.0$  Hz, 2H), 3.47 (br, 1H), 2.81 (s, 3H).  $^{13}\text{C}$  NMR ( $\text{CDCl}_3$ , 100 MHz):  $\delta$  155.8 (d,  $^1J_{\text{C-F}} = 240.0$  Hz), 145.7, 115.6 (d,  $^2J_{\text{C-F}} = 20.0$  Hz), 113.2 (d,  $^3J_{\text{C-F}} = 10.0$  Hz), 31.3. The physical and spectral data were consistent with those previously reported.<sup>1</sup>

#### 4-Chloro-*N*-methylaniline (3i)

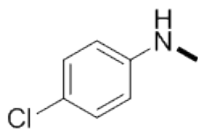

The typical procedure was applied to 4-chloroaniline (38.3 mg, 0.3 mmol). Yield: 27.8 mg, 66 %, yellow oil;  $R_f = 0.7$  (PE/EtOAc = 10/1); purified by column chromatography eluting with PE/EtOAc (30:1).  $^1\text{H}$  NMR ( $\text{CDCl}_3$ , 400 MHz):  $\delta$  7.13 (d,  $J = 8.0$  Hz, 2H), 6.53 (d,  $J = 8.0$  Hz, 2H), 3.70 (br, 1H), 2.81 (s, 3H).  $^{13}\text{C}$  NMR ( $\text{CDCl}_3$ , 100 MHz):  $\delta$  147.8, 128.9, 121.7, 113.4, 30.8. The physical and spectral data were consistent with those previously reported.<sup>1</sup>

#### 4-Bromo-*N*-methylaniline (3j)

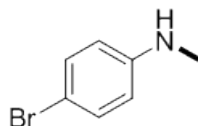

The typical procedure was applied to 4-bromoaniline (51.6 mg, 0.3 mmol). Yield: 35.0 mg, 63 %, yellow oil;  $R_f = 0.7$  (PE/EtOAc = 10/1); purified by column chromatography eluting with PE/EtOAc (30:1).  $^1\text{H}$  NMR ( $\text{CDCl}_3$ , 400 MHz):  $\delta$  7.26 (d,  $J = 8.0$  Hz, 2H), 6.48 (d,  $J = 8.0$  Hz, 2H), 3.72 (br, 1H) 2.81 (s, 3H).  $^{13}\text{C}$  NMR ( $\text{CDCl}_3$ , 100 MHz):  $\delta$  148.2, 131.8, 113.9, 108.7, 30.7. The physical and spectral data were consistent with those previously reported.<sup>1</sup>

#### 4-Iodo-*N*-methylaniline (3k)

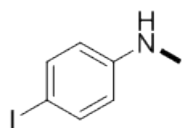

The typical procedure was applied to 4-iodoaniline (65.7 mg, 0.3 mmol). Yield: 30.7 mg, 44 %, brown oil,  $R_f = 0.7$  (PE/EtOAc = 10/1); purified by column chromatography eluting with PE/EtOAc (30:1).  $^1\text{H}$  NMR ( $\text{CDCl}_3$ , 400 MHz):  $\delta$  7.43 (d,  $J = 8.0$  Hz, 2H), 6.39 (d,  $J = 8.0$  Hz, 2H), 3.75 (br, 1H), 2.80 (s, 3H).  $^{13}\text{C}$  NMR ( $\text{CDCl}_3$ , 100 MHz):  $\delta$  148.8, 137.7, 114.6, 77.7, 30.5. The physical and spectral data were consistent with those previously reported.<sup>6</sup>

### ***N*-Methyl-4-(trifluoromethyl)aniline (3l)**

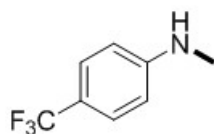

The typical procedure was applied to 4-(trifluoromethyl)aniline (48.3 mg, 0.3 mmol). Yield: 16.1 mg, 31 %, yellow solid,  $R_f = 0.4$  (PE/EtOAc = 10/1); purified by column chromatography eluting with PE/EtOAc (20:1),  $^1\text{H}$  NMR ( $\text{CDCl}_3$ , 400 MHz):  $\delta$  7.44 (d,  $J = 8.0$  Hz, 2H), 6.61 (d,  $J = 8.0$  Hz, 2H), 3.94 (br, 1H), 2.87 (s, 3H).  $^{13}\text{C}$  NMR ( $\text{CDCl}_3$ , 100 MHz):  $\delta$  151.6, 126.5 (q,  $^3J_{\text{C-F}} = 4.0$  Hz), 122.4 (d,  $^1J_{\text{C-F}} = 260.0$  Hz), 118.5 (q,  $^2J_{\text{C-F}} = 30.0$  Hz), 111.4, 30.1. The physical and spectral data were consistent with those previously reported.<sup>7</sup>

### ***N*-Methyl-[1,1'-biphenyl]-4-amine (3m)**

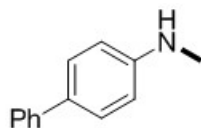

The typical procedure was applied to [1,1'-biphenyl]-4-amine (50.8 mg, 0.3 mmol). Yield: 36.0 mg, 66 %, orange oil,  $R_f = 0.7$  (PE/EtOAc = 10/1); purified by column chromatography eluting with PE/EtOAc (30:1),  $^1\text{H}$  NMR ( $\text{CDCl}_3$ , 400 MHz):  $\delta$  7.42 (d,  $J = 8.0$  Hz, 2H), 7.33 (d,  $J = 8.0$  Hz, 2H), 7.26 (t,  $J = 8.0$  Hz, 2H), 7.13 (t,  $J = 8.0$  Hz, 1H), 6.54 (d,  $J = 8.0$  Hz, 2H), 3.37 (br, 1H), 2.72 (s, 3H).  $^{13}\text{C}$  NMR ( $\text{CDCl}_3$ , 100 MHz):  $\delta$  148.7, 141.2, 130.1, 128.6, 127.8, 126.2, 126.0, 112.6, 30.7. The physical and spectral data were consistent with those previously reported.<sup>8</sup>

### ***N*-Methyl-4-(4,4,5,5-tetramethyl-1,3,2-dioxaborolan-2-yl)aniline (3n)**

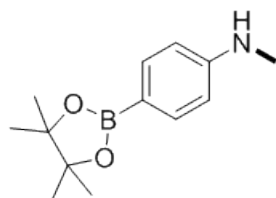

The typical procedure was applied to 4-(4,4,5,5-tetramethyl-1,3,2-dioxaborolan-2-yl)aniline (65.7 mg, 0.3 mmol). Yield:

46.2 mg, 66 %, yellow solid;  $R_f = 0.8$  (PE/EtOAc = 5/1); purified by column chromatography eluting with PE/EtOAc (10:1),  $^1\text{H}$  NMR ( $\text{CDCl}_3$ , 400 MHz):  $\delta$  7.66 (d,  $J = 8.0$  Hz, 2H), 6.58 (d,  $J = 8.0$  Hz, 2H), 3.94 (br, 1H), 2.85 (s, 3H), 1.33 (s, 12H).  $^{13}\text{C}$  NMR ( $\text{CDCl}_3$ , 100 MHz):  $\delta$  151.7, 136.3 (two carbons are overlapped), 111.4, 83.1, 30.2, 24.8. The physical and spectral data were consistent with those previously reported.<sup>9</sup>

### 3-Methoxy-*N*-methylaniline (3o)

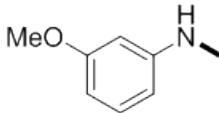 The typical procedure was applied to 3-methoxyaniline (36.9 mg, 0.3 mmol). Yield: 33.3 mg, 81 %, yellow oil;  $R_f = 0.6$  (PE/EtOAc = 5/1); purified by column chromatography eluting with PE/EtOAc (5:1),  $^1\text{H}$  NMR ( $\text{CDCl}_3$ , 400 MHz):  $\delta$  7.10 (t,  $J = 8.0$  Hz, 1H), 6.29 (d,  $J = 8.0$  Hz, 1H), 6.24 (d,  $J = 8.0$  Hz, 1H), 6.18 (d,  $J = 4.0$  Hz, 1H), 3.79 (s, 3H), 2.83 (s, 3H).  $^{13}\text{C}$  NMR ( $\text{CDCl}_3$ , 100 MHz):  $\delta$  160.8, 150.7, 129.9, 105.6, 102.3, 98.3, 55.0, 30.7. The physical and spectral data were consistent with those previously reported.<sup>1</sup>

### *N*,3,5-Trimethylaniline (3p)

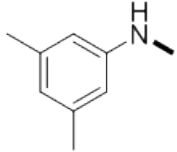 The typical procedure was applied to 3,5-dimethylaniline (36.4 mg, 0.3 mmol). Yield: 25.1 mg, 62 %, yellow oil;  $R_f = 0.7$  (PE/EtOAc = 10/1); purified by column chromatography eluting with PE/EtOAc (30:1),  $^1\text{H}$  NMR ( $\text{CDCl}_3$ , 400 MHz):  $\delta$  6.40 (s, 1H), 6.28 (s, 2H), 3.46 (br, 1H), 2.83 (s, 3H), 2.27 (s, 6H).  $^{13}\text{C}$  NMR ( $\text{CDCl}_3$ , 100 MHz):  $\delta$  149.4, 138.8, 119.3, 110.4, 30.8, 21.5. The physical and spectral data were consistent with those previously reported.<sup>10</sup>

### *N*-Methylbenzo[*d*][1,3]dioxol-5-amine (3q)

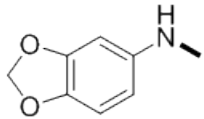 The typical procedure was applied to benzo[*d*][1,3]dioxol-5-amine (41.1 mg, 0.3 mmol). Yield: 23.2 mg, 51 %, brown oil;  $R_f = 0.7$  (PE/EtOAc = 5/1); purified by column chromatography eluting with PE/EtOAc (10:1),  $^1\text{H}$  NMR ( $\text{CDCl}_3$ , 400 MHz):  $\delta$  6.68 (d,  $J = 8.0$  Hz, 1H), 6.25 (d,  $J = 4.0$  Hz, 1H), 6.05 (dd,  $J = 8.0, 4.0$  Hz, 1H), 3.14 (br, 1H), 5.85 (s, 2H), 2.79 (s, 3H).  $^{13}\text{C}$  NMR ( $\text{CDCl}_3$ ,



100 MHz):  $\delta$  148.3, 145.2, 139.5, 108.6, 103.8, 100.5, 95.6, 31.6. The physical and spectral data were consistent with those previously reported.<sup>2</sup>

### ***N*-Methyl-4-(1*H*-pyrrol-1-yl)aniline (3r)**

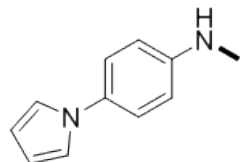

The typical procedure was applied to 4-(1*H*-pyrrol-1-yl)aniline (47.5 mg, 0.3 mmol). Yield: 35.5 mg, 69 %, yellow solid;  $R_f$  = 0.7 (PE/EtOAc = 5/1); purified by column chromatography eluting with PE/EtOAc (20:1), <sup>1</sup>H NMR (CDCl<sub>3</sub>, 400 MHz):  $\delta$  7.25 (d,  $J$  = 12.0 Hz, 2H), 7.01 (t,  $J$  = 4.0 Hz, 2H), 6.67 (d,  $J$  = 12.0 Hz, 2H), 6.34 (t,  $J$  = 4.0 Hz, 2H), 3.77 (br, 1H), 2.88 (s, 3H). <sup>13</sup>C NMR (CDCl<sub>3</sub>, 100 MHz):  $\delta$  147.5, 131.7, 122.4, 119.7, 112.7, 109.2, 30.9. The physical and spectral data were consistent with those previously reported.<sup>11</sup>

### ***N*-Methylbenzo[*b*]thiophen-5-amine (3s)**

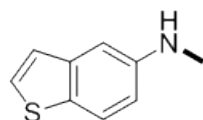

The typical procedure was applied to benzo[*b*]thiophen-5-amine (44.8 mg, 0.3 mmol). Yield: 28.9 mg, 59 %, brown oil;  $R_f$  = 0.8 (PE/EtOAc = 5/1); purified by column chromatography eluting with PE/EtOAc (20:1), <sup>1</sup>H NMR (CDCl<sub>3</sub>, 400 MHz):  $\delta$  7.64 (d,  $J$  = 8.0 Hz, 1H), 7.38 (d,  $J$  = 4.0 Hz, 1H), 7.20 (d,  $J$  = 4.0 Hz, 1H), 7.00 (d,  $J$  = 4.0 Hz, 1H), 6.74 (dd,  $J$  = 8.0, 4.0 Hz, 1H), 3.71 (br, 1H), 2.90 (s, 3H). <sup>13</sup>C NMR (CDCl<sub>3</sub>, 100 MHz):  $\delta$  146.9, 141.0, 129.2, 126.7, 123.3, 122.7, 113.8, 104.2, 31.1. The physical and spectral data were consistent with those previously reported.<sup>12</sup>

### ***N*-Methyldibenzo[*b,d*]furan-3-amine (3t)**

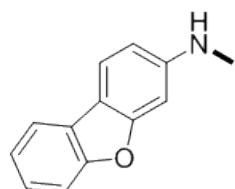

The typical procedure was applied to dibenzo[*b,d*]furan-3-amine (55.0 mg, 0.3 mmol). Yield: 37.7 mg, 64 %, yellow solid;  $R_f$  = 0.7 (PE/EtOAc = 5/1); purified by column chromatography eluting with PE/EtOAc (20:1), <sup>1</sup>H NMR (CDCl<sub>3</sub>, 400 MHz):  $\delta$  7.79 (d,  $J$  = 8.0 Hz, 1H), 7.69 (d,  $J$  = 8.0 Hz, 1H), 7.48 (d,  $J$  = 8.0 Hz, 1H), 7.40 – 7.13 (m, 2H), 6.75 (d,  $J$  = 4.0 Hz, 1H), 6.63 (dd,  $J$  = 8.0, 4.0 Hz, 1H), 4.01 (br, 1H), 2.92 (s, 3H). <sup>13</sup>C NMR (CDCl<sub>3</sub>, 100 MHz):  $\delta$  158.4, 155.7, 149.8, 125.0, 124.6, 122.5, 121.0, 119.1,

114.2, 111.0, 109.7, 93.7, 30.9. The physical and spectral data were consistent with those previously reported.<sup>13</sup>

### ***N*-Methylnaphthalen-1-amine (3u)**

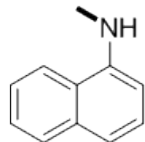

The typical procedure was applied to 1-naphthylamine (43.0 mg, 0.3 mmol). Yield: 15.3 mg, 50 %, brown oil,  $R_f = 0.7$  (PE/EtOAc =10/1); purified by column chromatography eluting with PE/EtOAc (30:1), <sup>1</sup>H NMR (CDCl<sub>3</sub>, 400 MHz):  $\delta$  7.80 (ddd,  $J = 12.0, 8.0, 4.0$  Hz, 2H), 7.50 – 7.41 (m, 2H), 7.39 (t,  $J = 8.0$  Hz, 1H), 7.29 – 7.19 (m, 1H), 6.62 (d,  $J = 8.0$  Hz, 1H), 4.45 (br, 1H), 3.03 (s, 3H). <sup>13</sup>C NMR (CDCl<sub>3</sub>, 100 MHz):  $\delta$  144.5, 134.2, 128.6, 126.6, 125.7, 124.7, 123.4, 119.7, 117.3, 103.7, 31.0. The physical and spectral data were consistent with those previously reported.<sup>14</sup>

## **2.2 General Procedure for Synthesis of *N,N*-Dimethylaniline.**

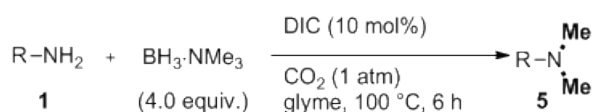

In a Schlenk tube was placed aniline (0.3 mmol), BH<sub>3</sub>·NMe<sub>3</sub> (87.54 mg, 1.2 mmol), *N,N'*-diisopropylcarbodiimide (3.7 mg, 0.03 mmol), glyme (0.2 mL). The resulting mixture was stirred with a CO<sub>2</sub> balloon at 100 °C for 6 h, and then allowed to room temperature. The reaction was quenched by saturated aqueous NaCl (1 mL). The aqueous layer was extracted with EtOAc (2 mL x 3). The combined organic layers were dried over MgSO<sub>4</sub> and concentrated under reduced pressure. The crude product was purified by column chromatography (silica gel, EtOAc/PE).

### ***N,N*,4-Trimethylaniline (5b)**

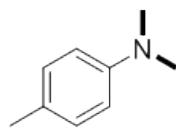

The typical procedure was applied to *N*,4-dimethylaniline (32.1 mg, 0.3 mmol). Yield: 30.8 mg, 76 %, yellow oil;  $R_f = 0.8$  (PE/EtOAc = 10/1);

purified by column chromatography eluting with PE/EtOAc (30:1),  $^1\text{H}$  NMR ( $\text{CDCl}_3$ , 400 MHz):  $\delta$  7.06 (d,  $J = 8.0$  Hz, 2H), 6.70 (d,  $J = 8.0$  Hz, 2H), 2.90 (s, 6H), 2.26 (s, 3H).  $^{13}\text{C}$  NMR ( $\text{CDCl}_3$ , 100 MHz):  $\delta$  148.8, 129.6, 126.1, 113.2, 41.1, 20.3. The physical and spectral data were consistent with those previously reported.<sup>15</sup>

#### 4-(*tert*-Butyl)-*N,N*-dimethylaniline (5d)

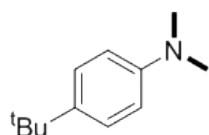

The typical procedure was applied to 4-(*tert*-butyl)aniline (44.8 mg, 0.3 mmol). Yield: 46.0 mg, 87 %, white solid;  $R_f = 0.8$  (PE/EtOAc = 10/1); purified by column chromatography eluting with PE/EtOAc (30:1);  $^1\text{H}$  NMR ( $\text{CDCl}_3$ , 400 MHz):  $\delta$  7.32 (d,  $J = 8.0$  Hz, 2H), 6.76 (d,  $J = 8.0$  Hz, 2H), 2.95 (s, 6H), 1.33 (s, 9H).  $^{13}\text{C}$  NMR ( $\text{CDCl}_3$ , 100 MHz):  $\delta$  148.4, 139.5, 125.8, 112.7, 40.9, 33.7, 31.5. The physical and spectral data were consistent with those previously reported.<sup>16</sup>

#### 4-Methoxy-*N,N*-dimethylaniline (5e)

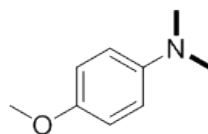

The typical procedure was applied to 4-methoxyaniline (37.0 mg, 0.3 mmol). Yield: 35.9 mg, 79 %, yellow oil;  $R_f = 0.8$  (PE/EtOAc = 10/1); purified by column chromatography eluting with PE/EtOAc (30:1);  $^1\text{H}$  NMR ( $\text{CDCl}_3$ , 400 MHz):  $\delta$  6.85 (d,  $J = 8.0$  Hz, 2H), 6.76 (d,  $J = 8.0$  Hz, 2H), 3.77 (s, 3H), 2.87 (s, 6H).  $^{13}\text{C}$  NMR ( $\text{CDCl}_3$ , 100 MHz):  $\delta$  152.0, 145.8, 114.9, 114.6, 55.7, 41.8. The physical and spectral data were consistent with those previously reported.<sup>15</sup>

#### *N,N*-Dimethyl-4-(methylthio)aniline (5f)

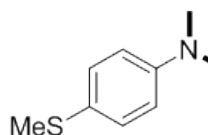

The typical procedure was applied to 4-(methylthio)aniline (41.8 mg, 0.3 mmol). Yield: 38.9 mg, 78 %, yellow oil;  $R_f = 0.8$  (PE/EtOAc = 10/1); purified by column chromatography eluting with PE/EtOAc (30:1);  $^1\text{H}$  NMR ( $\text{CDCl}_3$ , 400 MHz):  $\delta$  7.29 (d,  $J = 8.0$  Hz, 2H), 6.69 (d,  $J = 8.0$  Hz, 2H), 2.95 (s, 6H), 2.43 (s, 3H).  $^{13}\text{C}$  NMR ( $\text{CDCl}_3$ , 100 MHz):  $\delta$  149.4, 131.3, 123.3, 113.1, 40.5, 19.2. The physical and spectral data were consistent with those previously reported.<sup>17</sup>

#### 4-Fluoro-*N,N*-dimethylaniline (5h)

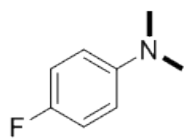

The typical procedure was applied to 4-fluoroaniline (33.3 mg, 0.3 mmol). Yield: 27.0 mg, 65 %, yellow oil,  $R_f = 0.8$  (PE/EtOAc = 10/1); purified by column chromatography eluting with PE/EtOAc (30:1);  $^1\text{H NMR}$  ( $\text{CDCl}_3$ , 400 MHz):  $\delta$  6.95 (t,  $J = 8.0$  Hz, 2H), 6.77 – 6.49 (m, 2H), 2.90 (s, 6H).  $^{13}\text{C NMR}$  ( $\text{CDCl}_3$ , 100 MHz):  $\delta$  155.6 (d,  $^1J_{\text{C-F}} = 240.0$  Hz), 147.5, 115.4 (d,  $^2J_{\text{C-F}} = 20.0$  Hz), 114.0 (d,  $^3J_{\text{C-F}} = 10.0$  Hz), 41.4. The physical and spectral data were consistent with those previously reported.<sup>15</sup>

#### 4-Chloro-*N,N*-dimethylaniline (5i)

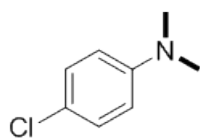

The typical procedure was applied to 4-chloroaniline (38.3 mg, 0.3 mmol). Yield: 37.8 mg, 81 %, yellow oil,  $R_f = 0.8$  (PE/EtOAc = 10/1); purified by column chromatography eluting with PE/EtOAc (30:1);  $^1\text{H NMR}$  ( $\text{CDCl}_3$ , 400 MHz):  $\delta$  7.18 (d,  $J = 8.0$  Hz, 2H), 6.64 (d,  $J = 8.0$  Hz, 2H), 2.93 (s, 6H).  $^{13}\text{C NMR}$  ( $\text{CDCl}_3$ , 100 MHz):  $\delta$  149.1, 128.8, 121.4, 113.6, 40.6. The physical and spectral data were consistent with those previously reported.<sup>15</sup>

#### 4-Bromo-*N,N*-dimethylaniline (5j)

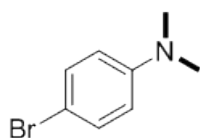

The typical procedure was applied to 4-bromoaniline (51.6 mg, 0.3 mmol). Yield: 53.0 mg, 89 %, light yellow solid;  $R_f = 0.8$  (PE/EtOAc = 10/1); purified by column chromatography eluting with PE/EtOAc (30:1);  $^1\text{H NMR}$  ( $\text{CDCl}_3$ , 400 MHz):  $\delta$  7.31 (d,  $J = 8.0$  Hz, 2H), 6.59 (d,  $J = 8.0$  Hz, 1H), 2.93 (s, 6H).  $^{13}\text{C NMR}$  ( $\text{CDCl}_3$ , 100 MHz):  $\delta$  149.4, 131.6, 114.0, 108.4, 40.5. The physical and spectral data were consistent with those previously reported.<sup>15</sup>

#### 4-Iodo-*N,N*-dimethylaniline (5k)

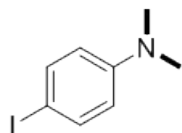

The typical procedure was applied to 4-iodoaniline (65.7 mg, 0.3 mmol). Yield: 59.3 mg, 80 %, yellow solid;  $R_f = 0.8$  (PE/EtOAc = 10/1); purified by column chromatography eluting with PE/EtOAc (30:1),  $^1\text{H NMR}$  ( $\text{CDCl}_3$ , 400 MHz):  $\delta$  7.48 (d,  $J = 8.0$  Hz, 2H), 6.50 (d,  $J = 8.0$  Hz, 2H), 2.93 (s, 6H).  $^{13}\text{C NMR}$  ( $\text{CDCl}_3$ , 100 MHz):  $\delta$  149.9, 137.5, 114.6, 76.7, 40.3. The physical and spectral data were consistent with those previously reported.<sup>15</sup>

#### ***N,N*-Dimethyl-4-(trifluoromethyl)aniline (5l)**

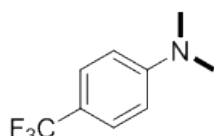

The typical procedure was applied to 4-(trifluoromethyl)aniline (48.3 mg, 0.3 mmol). Yield: 38.3 mg, 68 %, yellow solid;  $R_f = 0.8$  (PE/EtOAc = 10/1); purified by column chromatography eluting with PE/EtOAc (30:1);  $^1\text{H NMR}$  ( $\text{CDCl}_3$ , 400 MHz):  $\delta$  7.47 (d,  $J = 8.0$  Hz, 2H), 6.72 (d,  $J = 8.0$  Hz, 2H), 3.03 (s, 6H).  $^{13}\text{C NMR}$  (100 MHz,  $\text{CDCl}_3$ ):  $\delta$  152.3, 126.3, (q,  $^3J_{\text{C-F}}=4.0$  Hz), 125.2 (d,  $^1J_{\text{C-F}}=270.0$  Hz), 117.5 (d,  $^2J_{\text{C-F}}=30.0$  Hz), 111.1, 40.1. The physical and spectral data were consistent with those previously reported.<sup>15</sup>

#### ***N,N*-Dimethyl-4-nitroaniline (5v)**

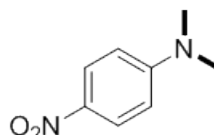

The typical procedure was applied to *N*-methyl-4-nitroaniline (41.4 mg, 0.3 mmol). Yield: 40.4 mg, 81 %, yellow solid;  $R_f = 0.7$  (PE/EtOAc = 2/1); purified by column chromatography eluting with PE/EtOAc (5:1);  $^1\text{H NMR}$  ( $\text{CDCl}_3$ , 400 MHz):  $\delta$  8.11 (d,  $J = 8.0$  Hz, 2H), 6.59 (d,  $J = 8.0$  Hz, 2H), 3.12 (s, 6H).  $^{13}\text{C NMR}$  ( $\text{CDCl}_3$ , 100MHz):  $\delta$  154.2, 136.9, 126.1, 110.2, 40.2. The physical and spectral data were consistent with those previously reported.<sup>15</sup>

#### **4-(Dimethylamino)benzotrile (5w)**

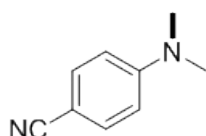

The typical procedure was applied to 4-aminobenzotrile (35.4 mg, 0.3 mmol). Yield: 23.7 mg, 54 %, white solid;  $R_f = 0.6$  (PE/EtOAc = 5/1); purified by column chromatography eluting with PE/EtOAc (10:1);  $^1\text{H NMR}$

(CDCl<sub>3</sub>, 400 MHz):  $\delta$  7.45 (d,  $J$  = 8.0 Hz, 2H), 6.63 (d,  $J$  = 8.0 Hz, 2H), 3.03 (s, 6H).  
<sup>13</sup>C NMR (CDCl<sub>3</sub>, 100 MHz):  $\delta$  152.4, 133.3, 120.7, 111.3, 97.1, 39.9. The physical and spectral data were consistent with those previously reported.<sup>15</sup>

#### Methyl 4-(dimethylamino)benzoate (5x)

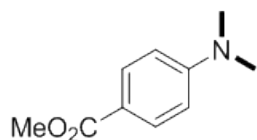

The typical procedure was applied to methyl 4-aminobenzoate (45.3 mg, 0.3 mmol). Yield: 38.5 mg, 72 %, yellow oil;  $R_f$  = 0.8 (PE/EtOAc = 5/1); purified by column chromatography eluting with PE/EtOAc (10:1); <sup>1</sup>H NMR (CDCl<sub>3</sub>, 400 MHz):  $\delta$  7.90 (d,  $J$  = 8.0 Hz, 2H), 6.63 (d,  $J$  = 8.0 Hz, 2H), 3.85 (s, 3H), 3.02 (s, 6H). <sup>13</sup>C NMR (CDCl<sub>3</sub>, 100 MHz):  $\delta$  167.4, 153.2, 131.2, 116.8, 110.6, 51.4, 39.9. The physical and spectral data were consistent with those previously reported.<sup>18</sup>

#### 4-(Dimethylamino)phenol (5y)

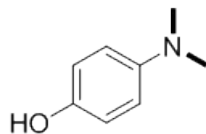

The typical procedure was applied to 4-aminophenol (32.7 mg, 0.3 mmol). Yield: 25.2 mg, 61 %, black solid;  $R_f$  = 0.7 (PE/EtOAc = 2/1); purified by column chromatography eluting with PE/EtOAc (5:1); <sup>1</sup>H NMR (DMSO-*d*<sub>6</sub>, 400 MHz):  $\delta$  8.61 (s, 1H), 6.62 (s, 4H), 2.73 (s, 6H). <sup>13</sup>C NMR (DMSO-*d*<sub>6</sub>, 100 MHz)  $\delta$  149.3, 144.4, 115.6, 115.0, 41.6. The physical and spectral data were consistent with those previously reported.<sup>19</sup>

#### *N,N*-Dimethyl-[1,1'-biphenyl]-4-amine (5m)

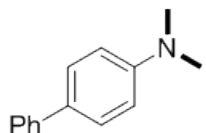

The typical procedure was applied to [1,1'-biphenyl]-4-amine (50.8 mg, 0.3 mmol). Yield: 48.6 mg, 82 %, white solid;  $R_f$  = 0.8 (PE/EtOAc = 10/1); purified by column chromatography eluting with PE/EtOAc (30:1); <sup>1</sup>H NMR (CDCl<sub>3</sub>, 400 MHz):  $\delta$  7.63 (d,  $J$  = 8.0 Hz, 2H), 7.58 (d,  $J$  = 8.0 Hz, 2H), 7.46 (t,  $J$  = 8.0 Hz, 2H), 7.32 (s, 1H), 6.87 (d,  $J$  = 8.0 Hz, 2H), 3.04 (s, 6H). <sup>13</sup>C NMR

(CDCl<sub>3</sub>, 100 MHz):  $\delta$  149.9, 141.1, 129.1, 128.6, 127.6, 126.2, 125.9, 112.7, 40.5. The physical and spectral data were consistent with those previously reported.<sup>15</sup>

### ***N,N*-Dimethyl-4-(4,4,5,5-tetramethyl-1,3,2-dioxaborolan-2-yl)aniline (5n)**

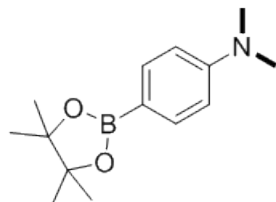

The typical procedure was applied to 4-(4,4,5,5-tetramethyl-1,3,2-dioxaborolan-2-yl)aniline (65.7 mg, 0.3 mmol). Yield: 55.9 mg, 75 %, yellow solid;  $R_f$  = 0.7 (PE/EtOAc = 5/1); purified by column chromatography eluting with PE/EtOAc (20:1), <sup>1</sup>H NMR (CDCl<sub>3</sub>, 400 MHz):  $\delta$  7.71 (d,  $J$  = 8.0 Hz, 2H), 6.70 (d,  $J$  = 8.0 Hz, 2H), 2.99 (s, 6H), 1.34 (s, 12H). <sup>13</sup>C NMR (CDCl<sub>3</sub>, 100 MHz):  $\delta$  152.5, 136.1 (two carbons are overlapped), 111.2, 83.1, 40.1, 24.8. The physical and spectral data were consistent with those previously reported.<sup>20</sup>

### **3-Bromo-*N,N*-dimethylaniline (5z)**

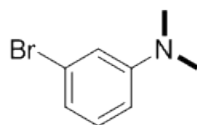

The typical procedure was applied to 3-bromoaniline (51.6 mg, 0.3 mmol). Yield: 47.9 mg, 80 %, light yellow solid;  $R_f$  = 0.8 (PE/EtOAc = 5/1); purified by column chromatography eluting with PE/EtOAc (10:1); <sup>1</sup>H NMR (CDCl<sub>3</sub>, 400 MHz):  $\delta$  7.10 (d,  $J$  = 8.0 Hz, 1H), 6.85 (d,  $J$  = 4.0 Hz, 2H), 6.64 (d,  $J$  = 8.0 Hz, 1H), 2.96 (d,  $J$  = 8.0 Hz, 6H). <sup>13</sup>C NMR (CDCl<sub>3</sub>, 100 MHz):  $\delta$  130.2, 123.3, 119.0, 115.0, 110.8, 40.3. The physical and spectral data were consistent with those previously reported.<sup>21</sup>

### **2-Bromo-*N,N*-dimethylaniline (5aa)**

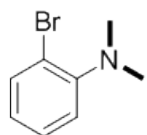

The typical procedure was applied to 2-bromoaniline (51.6 mg, 0.3 mmol). Yield: 48.3 mg, 81 %, light yellow solid;  $R_f$  = 0.8 (PE/EtOAc = 10/1); purified by column chromatography eluting with PE/EtOAc (30:1); <sup>1</sup>H NMR (CDCl<sub>3</sub>, 400 MHz):  $\delta$  7.56 (d,  $J$  = 8.0 Hz, 1H), 7.27 (t,  $J$  = 8.0 Hz, 1H), 7.10 (d,  $J$  = 8.0 Hz, 1H), 6.89 (t,  $J$  = 8.0 Hz, 1H), 2.81 (s, 6H). <sup>13</sup>C NMR (CDCl<sub>3</sub>, 100 MHz):  $\delta$  151.8,

133.8, 128.0, 123.9, 120.4, 119.1, 44.2. The physical and spectral data were consistent with those previously reported.<sup>22</sup>

#### ***N,N*-Dimethylnaphthalen-1-amine (5u)**

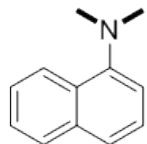

The typical procedure was applied to naphthalen-1-amine (43.0 mg, 0.3 mmol). Yield: 40.6 mg, 79 %, white solid;  $R_f = 0.8$  (PE/EtOAc = 5/1); purified by column chromatography eluting with PE/EtOAc (10:1);  $^1\text{H}$  NMR ( $\text{CDCl}_3$ , 400 MHz):  $\delta$  8.25 (d,  $J = 8.0$  Hz, 1H), 7.84 (d,  $J = 8.0$  Hz, 1H), 7.51 (m, 3H), 7.44 – 7.33 (m, 1H), 7.09 (d,  $J = 4.0$  Hz, 1H), 2.92 (s, 6H).  $^{13}\text{C}$  NMR (100 MHz,  $\text{CDCl}_3$ ):  $\delta$  150.8, 134.7, 128.7, 128.3, 125.7, 125.7, 125.1, 124.1, 122.8, 113.9, 45.2. The physical and spectral data were consistent with those previously reported.<sup>15</sup>

#### **6-Chloro-*N,N*-dimethylpyridin-2-amine (5ab)**

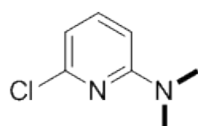

The typical procedure was applied to 6-chloropyridin-2-amine (38.6 mg, 0.3 mmol). Yield: 37.6 mg, 80 %, colorless oil;  $R_f = 0.8$  (PE/EtOAc = 5/1); purified by column chromatography eluting with PE/EtOAc (10:1);  $^1\text{H}$  NMR ( $\text{CDCl}_3$ , 400 MHz):  $\delta$  7.35 (t,  $J = 8.0$  Hz, 1H), 6.51 (d,  $J = 8.0$  Hz, 1H), 6.34 (d,  $J = 8.0$  Hz, 1H), 3.06 (s, 6H).  $^{13}\text{C}$  NMR ( $\text{CDCl}_3$ , 100 MHz):  $\delta$  159.1, 149.2, 139.2, 110.2, 103.5, 37.9. The physical and spectral data were consistent with those previously reported.<sup>23</sup>

#### **6-Bromo-*N,N*-dimethylpyridin-2-amine (5ac)**

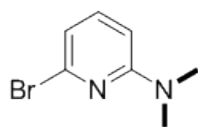

The typical procedure was applied to 6-bromopyridin-2-amine (51.9 mg, 0.3 mmol). Yield: 45.5 mg, 76 %, colorless oil;  $R_f = 0.8$  (PE/EtOAc = 5/1); purified by column chromatography eluting with PE/EtOAc (10:1);  $^1\text{H}$  NMR ( $\text{CDCl}_3$ , 400 MHz):  $\delta$  7.24 (t,  $J = 8.0$  Hz, 1H), 6.66 (d,  $J = 8.0$  Hz, 1H), 6.37 (d,  $J = 8.0$  Hz, 1H), 3.06 (s, 6H).  $^{13}\text{C}$  NMR ( $\text{CDCl}_3$ , 100 MHz):  $\delta$  159.1, 140.1, 139.0,



114.1, 103.8, 37.9. The physical and spectral data were consistent with those previously reported.<sup>24</sup>

#### ***N,N*-Dimethyl-4-(1*H*-pyrrol-1-yl)aniline (5r)**

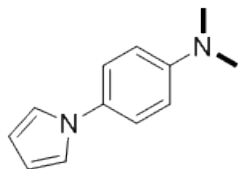

The typical procedure was applied to 4-(1*H*-pyrrol-1-yl)aniline (47.5 mg, 0.3 mmol). Yield: 43.3 mg, 78 %, yellow solid;  $R_f$  = 0.8 (PE/EtOAc = 5/1); purified by column chromatography eluting with PE/EtOAc (20:1), <sup>1</sup>H NMR (CDCl<sub>3</sub>, 400 MHz): δ 7.29 (d,  $J$  = 8.0 Hz, 2H), 7.01 (t,  $J$  = 4.0 Hz, 2H), 6.79 (d,  $J$  = 8.0 Hz, 2H), 6.33 (t,  $J$  = 4.0 Hz, 2H), 3.00 (s, 6H). <sup>13</sup>C NMR (CDCl<sub>3</sub>, 100 MHz): δ 148.9, 131.2, 122.1, 119.7, 113.0, 109.3, 40.8. The physical and spectral data were consistent with those previously reported.<sup>25</sup>

#### ***N,N*-Dimethylbenzo[*b*]thiophen-5-amine (5s)**

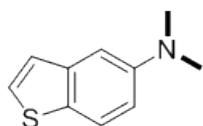

The typical procedure was applied to benzo[*b*]thiophen-5-amine (44.8 mg, 0.3 mmol). Yield: 47.0 mg, 88 %, yellow solid;  $R_f$  = 0.9 (PE/EtOAc = 5/1); purified by column chromatography eluting with PE/EtOAc (20:1), <sup>1</sup>H NMR (CDCl<sub>3</sub>, 400 MHz): δ 7.74 (d,  $J$  = 8.0 Hz, 1H), 7.41 (d,  $J$  = 8.0 Hz, 1H), 7.25 (d,  $J$  = 8.0 Hz, 1H), 7.16 (d,  $J$  = 4.0 Hz, 1H), 6.99 (dd,  $J$  = 8.0, 4.0 Hz, 1H), 3.02 (s, 6H). <sup>13</sup>C NMR (CDCl<sub>3</sub>, 100 MHz): δ 148.7, 140.9, 129.0, 126.7, 123.5, 122.5, 113.3, 106.3, 41.4. The physical and spectral data were consistent with those previously reported.<sup>26</sup>

#### ***N,N*-Dimethyldibenzo[*b,d*]furan-2-amine (5t)**

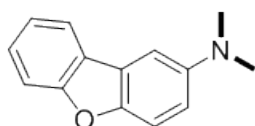

The typical procedure was applied to dibenzo[*b,d*]furan-2-amine (54.9 mg, 0.3 mmol). Yield: 55.4 mg, 87 %, yellow solid;  $R_f$  = 0.9 (PE/EtOAc = 5/1); purified by column chromatography eluting with PE/EtOAc (20:1), <sup>1</sup>H NMR (CDCl<sub>3</sub>, 400 MHz): δ 7.83 (d,  $J$  = 8.0 Hz, 1H), 7.78 (d,  $J$  = 8.0 Hz, 1H), 7.53 (d,  $J$  = 8.0 Hz, 1H), 7.42 – 7.27 (m, 2H), 6.89 (d,  $J$  = 4.0 Hz, 1H), 6.79 (dd,  $J$  = 8.0, 4.0 Hz, 1H), 3.06 (s, 6H). <sup>13</sup>C NMR (CDCl<sub>3</sub>, 100 MHz): δ

158.5, 155.9, 151.0, 125.1, 124.8, 122.5, 120.9, 119.2, 113.6, 111.1, 108.9, 94.7, 41.0. The physical and spectral data were consistent with those previously reported.<sup>27</sup>

#### 1-*iso*-Butyl-*N,N*-dimethyl-1*H*-imidazo[4,5-*c*]quinolin-4-amine (5ad)

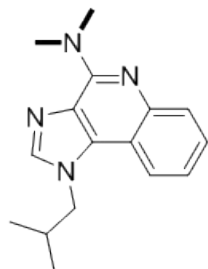

The typical procedure was applied to 1-isobutyl-1*H*-imidazo[4,5-*c*]quinolin-4-amine (48.1 mg, 0.2 mmol). Yield: 33.7 mg, 63 %, white solid;  $R_f = 0.6$  (PE/EtOAc = 2/1); purified by column chromatography eluting with PE/EtOAc (3:1), <sup>1</sup>H NMR (CDCl<sub>3</sub>, 400 MHz):  $\delta$  7.89 (t,  $J = 8.0$  Hz, 2H), 7.76 (s, 1H), 7.52 (t,  $J = 8.0$  Hz, 1H), 7.30 (s, 1H), 4.30 (d,  $J = 8.0$  Hz, 2H), 3.63 (s, 6H), 2.64 – 2.24 (m, 1H), 1.05 (d,  $J = 8.0$  Hz, 6H). <sup>13</sup>C NMR (CDCl<sub>3</sub>, 100 MHz):  $\delta$  152.1, 145.1, 140.7, 133.8, 129.9, 127.4, 127.2, 121.3, 119.6, 114.7, 55.0, 39.5, 28.5, 19.7. The physical and spectral data were consistent with those previously reported. HRMS(ESI)  $m/z$ : [M + H]<sup>+</sup> Calcd for C<sub>16</sub>H<sub>21</sub>N<sub>4</sub> 269.1761; Found 269.1759.

#### 7-(Dimethylamino)-4-methyl-2*H*-chromen-2-one (5ae)

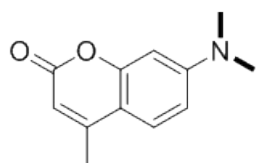

The typical procedure was applied to 7-amino-4-methyl-2*H*-chromen-2-one (52.6 mg, 0.3 mmol). Yield: 26.6 mg, 44 %, light yellow solid;  $R_f = 0.5$  (PE/EtOAc = 2/1); purified by column chromatography eluting with PE/EtOAc (3:1); <sup>1</sup>H NMR (CDCl<sub>3</sub>, 400 MHz):  $\delta$  7.39 (d,  $J = 8.0$  Hz, 1H), 6.61 (dd,  $J = 8.0, 4.0$  Hz, 1H), 6.50 (s, 1H), 5.96 (q,  $J = 4.0$  Hz, 1H), 3.04 (s, 6H), 2.34 (s, 3H). <sup>13</sup>C NMR (CDCl<sub>3</sub>, 100 MHz):  $\delta$  162.1, 155.6, 152.9, 152.8, 125.2, 109.6, 109.2, 108.7, 98.2, 40.1, 18.5. The physical and spectral data were consistent with those previously reported.<sup>28</sup>

#### Borane-*N,N*-dimethyl-2-phenylethan-1-amine complex(5af)

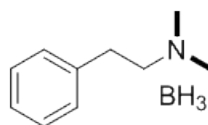

The typical procedure was applied to 2-phenylethan-1-amine (36.4 mg, 0.3 mmol). Yield: 26.6 mg, 54 %, white solid;  $R_f = 0.8$  (PE/EtOAc = 5/1); purified by column chromatography eluting with PE/EtOAc (30:1);

$^1\text{H}$  NMR ( $\text{CDCl}_3$ , 400 MHz):  $\delta$  7.31 (t,  $J = 8.0$  Hz, 2H), 7.28 – 7.14 (m, 3H), 3.09 – 3.03 (m, 2H), 3.00 – 2.95 (m, 2H), 2.66 (s, 6H), 2.21 – 1.52 (m, 3H).  $^{13}\text{C}$  NMR ( $\text{CDCl}_3$ , 100 MHz):  $\delta$  137.9, 128.7 (two carbons are overlapped), 126.7, 66.1, 51.7, 30.8.  $^{11}\text{B}$  NMR ( $\text{CDCl}_3$ , 128 MHz):  $\delta$  -10.0 (q,  $J = 102.4$  Hz). The physical and spectral data were consistent with those previously reported.<sup>29</sup>

**Borane-2-(4-chlorophenyl)-*N,N*-dimethylethan-1-amine complex (5ag)**

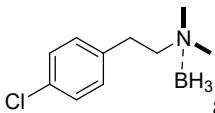 The typical procedure was applied to 2-(4-chlorophenyl)ethan-1-amine (46.7 mg, 0.3 mmol). Yield: 36.7 mg, 62 %, white solid,  $R_f = 0.4$  (PE/EtOAc = 5/1); purified by column chromatography eluting with PE/EtOAc (30:1).  $^1\text{H}$  NMR ( $\text{CDCl}_3$ , 400 MHz):  $\delta$  7.21 (d,  $J = 8.0$  Hz, 2H), 7.07 (d,  $J = 8.0$  Hz, 2H), 3.03 – 2.93 (m, 2H), 2.85 (m, 2H), 2.58 (s, 6H), 1.98 – 1.54 (m, 3H).  $^{13}\text{C}$  NMR ( $\text{CDCl}_3$ , 100 MHz):  $\delta$  136.4, 132.5, 130.1, 128.8, 65.9, 51.8, 30.2.  $^{11}\text{B}$  NMR ( $\text{CDCl}_3$ , 128 MHz):  $\delta$  -10.0 (q,  $J = 98.6$  Hz). HRMS(ESI)  $m/z$ :  $[\text{M} + \text{H}]^+$  Calcd for  $\text{C}_{10}\text{H}_{15}\text{ClN}$  184.0887; Found 184.0890 (Only amine was observed. The  $\text{BH}_3$  was removed under ESI mode).

**Borane-2-(4-methoxyphenyl)-*N,N*-dimethylethan-1-amine complex (5ah)**

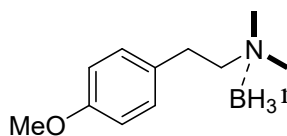 The typical procedure was applied to 2-(4-methoxyphenyl)ethan-1-amine (45.4 mg, 0.3 mmol). Yield: 37.7 mg, 65 %, white solid,  $R_f = 0.4$  (PE/EtOAc = 5/1); purified by column chromatography eluting with PE/EtOAc (30:1).  $^1\text{H}$  NMR ( $\text{CDCl}_3$ , 400 MHz):  $\delta$  7.12 (d,  $J = 8.0$  Hz, 2H), 6.85 (d,  $J = 8.0$  Hz, 2H), 3.79 (s, 3H), 3.05 – 2.96 (m, 2H), 2.93 (m, 2H), 2.65 (s, 6H), 2.06 – 1.59 (m, 3H).  $^{13}\text{C}$  NMR ( $\text{CDCl}_3$ , 100 MHz):  $\delta$  158.3, 129.9, 129.7, 114.1, 66.3, 55.3, 51.7, 29.9.  $^{11}\text{B}$  NMR ( $\text{CDCl}_3$ , 128 MHz):  $\delta$  -10.1 (q,  $J = 98.6$  Hz). HRMS(ESI)  $m/z$ :  $[\text{M} + \text{H}]^+$  Calcd for  $\text{C}_{11}\text{H}_{18}\text{ON}$  180.1382; Found 180.1377 (Only amine was observed. The  $\text{BH}_3$  was removed under ESI mode).

**Borane-*N,N*-dimethyl-3-phenylpropan-1-amine complex (5ai)**

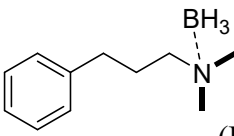
 The typical procedure was applied to 3-phenylpropan-1-amine (40.6 mg, 0.3 mmol). Yield: 29.2 mg, 55 %, white solid,  $R_f = 0.4$  (PE/EtOAc = 5/1); purified by column chromatography eluting with PE/EtOAc (30:1).  $^1\text{H}$  NMR ( $\text{CDCl}_3$ , 400 MHz):  $\delta$  7.31 (t,  $J = 8.0$  Hz, 2H), 7.25 – 7.13 (m, 3H), 2.84 – 2.73 (m, 2H), 2.62 (t,  $J = 8.0$  Hz, 2H), 2.56 (s, 6H), 2.19 – 1.96 (m, 2H), 1.79 – 1.26 (m, 3H).  $^{13}\text{C}$  NMR ( $\text{CDCl}_3$ , 100 MHz):  $\delta$  140.6, 128.5, 128.2, 126.2, 64.1, 51.3, 33.3, 25.5.  $^{11}\text{B}$  NMR ( $\text{CDCl}_3$ , 128 MHz):  $\delta$  -10.0 (q,  $J = 89.6$  Hz). The physical and spectral data were consistent with those previously reported.<sup>29</sup>

#### 4. Gram-Scale Reaction

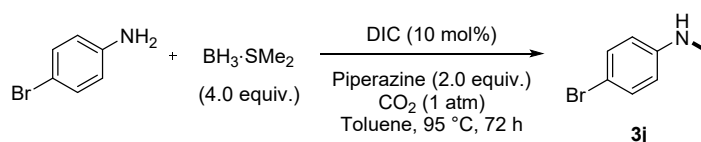

In a 100 mL Schlenk tube was placed 4-bromoaniline (860.3 mg, 5.0 mmol), piperazine (861.4 mg, 10.0 mmol),  $\text{BH}_3 \cdot \text{SMe}_2$  (2.0 mL, 10 mol/L, 20.0 mmol),  $N,N'$ -diisopropylcarbodiimide (63.1 mg, 0.5 mmol), toluene (6.0 mL). The resulting mixture was stirred with a  $\text{CO}_2$  balloon at  $95^\circ\text{C}$  for 72 h, and then allowed to room temperature. The reaction was quenched by saturated brine (10 mL). The aqueous layer was extracted with EtOAc (30 mL x 3). The combined organic layers were dried over  $\text{MgSO}_4$  and concentrated under reduced pressure. The crude product was purified by column chromatography (silica gel, EtOAc/PE). Yield: 407.5 mg, 44 %, yellow oil.

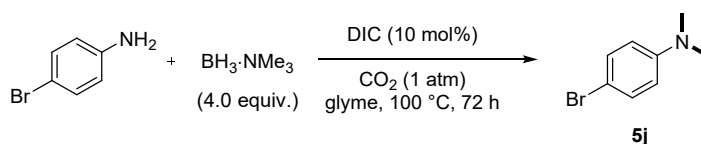

In a 100 mL Schlenk tube was placed 4-bromoaniline (860.3 mg, 5.0 mmol),  $\text{BH}_3 \cdot \text{NMe}_3$  (1459.0 mg, 20.0 mmol),  $N,N'$ -diisopropylcarbodiimide (63.1 mg, 0.5 mmol), glyme (3.0 mL). The resulting mixture was stirred with a  $\text{CO}_2$  balloon at  $100^\circ\text{C}$  for 72 h, and

then allowed to room temperature. The reaction was quenched by saturated brine (10 mL). The aqueous layer was extracted with EtOAc (30 mL x 3). The combined organic layers were dried over  $\text{MgSO}_4$  and concentrated under reduced pressure. The crude product was purified by column chromatography (silica gel, EtOAc/PE). Yield: 633.5 mg, 64 %, light yellow solid.

## 5. Mechanistic Studies:

### Scheme S1. HRMS experiments.

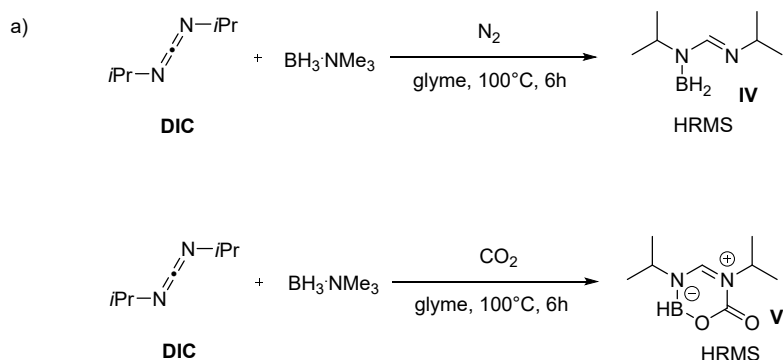

a) In a Schlenk tube was placed  $\text{BH}_3\cdot\text{NMe}_3$  (14.6 mg, 0.2 mmol), DIC (25.2 mg, 0.2 mmol), glyme (0.1 mL). The resulting mixture was stirred under  $\text{N}_2$  atmosphere at 100 °C (heating block) for 6 h, and then allowed to room temperature. The resulting mixture **IV** was added MeCN in glovebox for HRMS analysis. HRMS(ESI)  $m/z$ :  $[\text{M}+\text{H}]^+$  Calcd for  $\text{C}_7\text{H}_{18}\text{BN}_2$  141.1558; Found 141.1553.

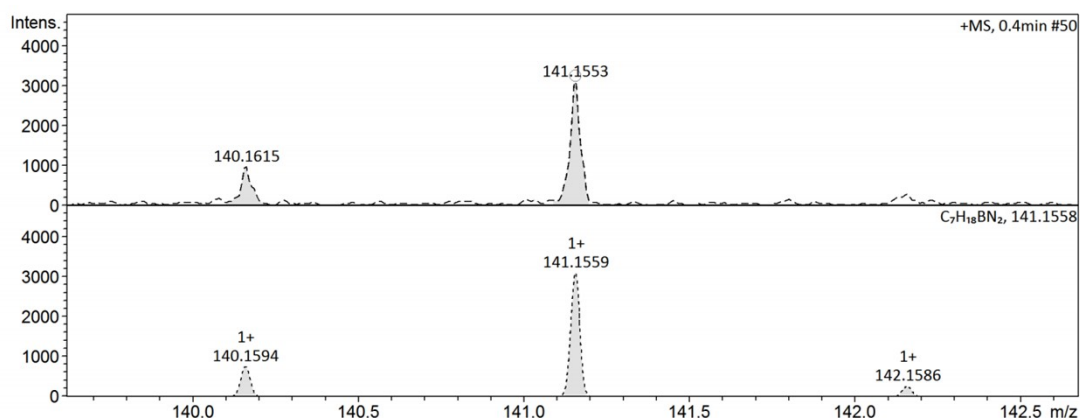

In a Schlenk tube was placed  $\text{BH}_3\cdot\text{NMe}_3$  (14.6 mg, 0.2 mmol), DIC (25.2 mg, 0.2 mmol), glyme (0.1 mL). The resulting mixture was stirred under  $\text{CO}_2$  atmosphere at 100 °C (heating block) for 6 h, and then allowed to room temperature. The resulting mixture **V** was added MeCN in glovebox for HRMS analysis. HRMS(ESI)  $m/z$ :  $[\text{M}+\text{H}]^+$  Calcd for  $\text{C}_8\text{H}_{18}\text{BN}_2\text{O}_2$  185.1456; Found 185.1463.

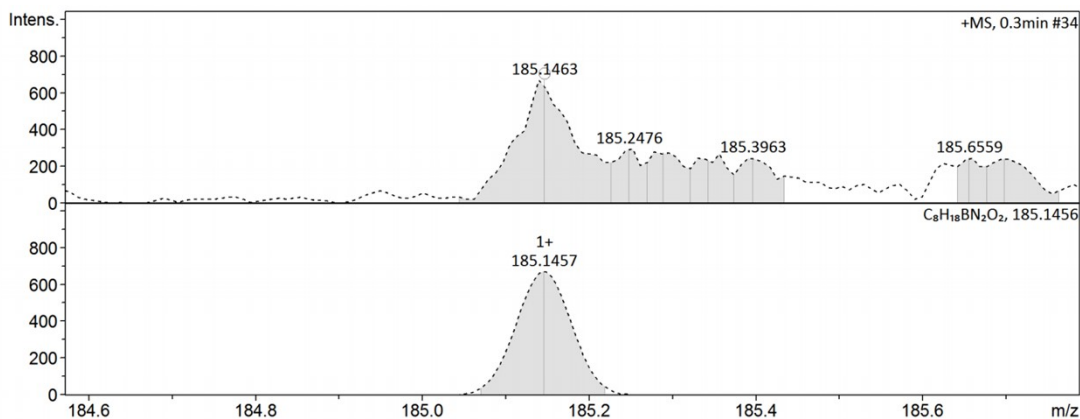

**Scheme S2.** Control experiments.

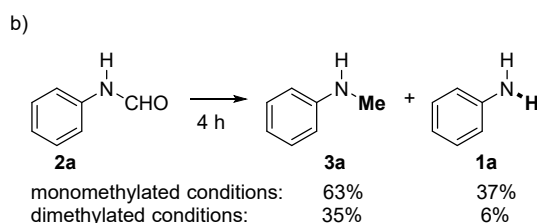

b) In a Schlenk tube was placed **2a** (36.3 mg, 0.3 mmol), piperazine (51.7 mg, 0.6 mmol),  $\text{BH}_3 \cdot \text{SMe}_2$  (120.0  $\mu\text{L}$ , 10 mol/L, 1.2 mmol), DIC (3.7 mg, 0.03 mmol), toluene (0.4 mL). The resulting mixture was stirred with a  $\text{N}_2$  atmosphere at 95  $^\circ\text{C}$  for 4 h, and then allowed to room temperature. The reaction was quenched by saturated aqueous NaCl (1 mL). The yield was determined by GC with tridecane as the internal standard.

In a Schlenk tube was placed **2a** (36.3 mg, 0.3 mmol),  $\text{BH}_3 \cdot \text{NMe}_3$  (87.5 mg, 1.2 mmol), DIC (3.7 mg, 0.03 mmol), glyme (0.2 mL). The resulting mixture was stirred with a  $\text{N}_2$  atmosphere at 100  $^\circ\text{C}$  for 4 h, and then allowed to room temperature. The reaction was quenched by saturated aqueous NaCl (1 mL). The yield was determined by GC with tridecane as the internal standard.

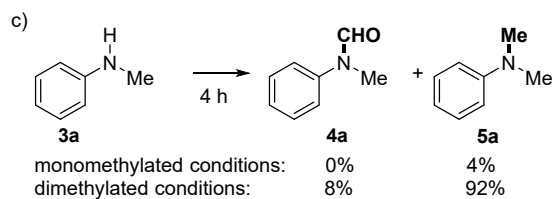

c) In a Schlenk tube was placed **3a** (32.1 mg, 0.3 mmol), piperazine (51.7 mg, 0.6 mmol),  $\text{BH}_3\cdot\text{SMe}_2$  (120.0  $\mu\text{L}$ , 10 mol/L, 1.2 mmol), DIC (3.7 mg, 0.03 mmol), toluene (0.4 mL). The resulting mixture was stirred with a  $\text{CO}_2$  balloon at 95 °C for 4 h, and then allowed to room temperature. The reaction was quenched by saturated aqueous NaCl (1 mL). The yield was determined by GC with tridecane as the internal standard.

In a Schlenk tube was placed **3a** (32.1 mg, 0.3 mmol),  $\text{BH}_3\cdot\text{NMe}_3$  (87.5 mg, 1.2 mmol), DIC (3.7 mg, 0.03 mmol), glyme (0.2 mL). The resulting mixture was stirred with a  $\text{CO}_2$  balloon at 100 °C for 4 h, and then allowed to room temperature. The reaction was quenched by saturated aqueous NaCl (1 mL). The yield was determined by GC with tridecane as the internal standard.

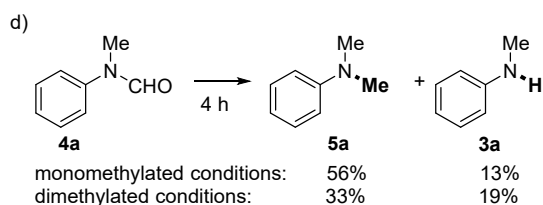

d) In a Schlenk tube was placed **4a** (40.5 mg, 0.3 mmol), piperazine (51.7 mg, 0.6 mmol),  $\text{BH}_3\cdot\text{SMe}_2$  (120.0  $\mu\text{L}$ , 10mol/L, 1.2 mmol), DIC (3.7 mg, 0.03 mmol), toluene (0.4 mL). The resulting mixture was stirred with a  $\text{CO}_2$  balloon at 95 °C for 4 h, and then allowed to room temperature. The reaction was quenched by saturated aqueous NaCl (1 mL). The yield was determined by GC with tridecane as the internal standard.

In a Schlenk tube was placed **4a** (40.5 mg, 0.3 mmol),  $\text{BH}_3\cdot\text{NMe}_3$  (87.5 mg, 1.2 mmol), DIC (3.7 mg  $\mu\text{L}$ , 0.03 mmol), glyme (0.2 mL). The resulting mixture was



stirred with a CO<sub>2</sub> balloon at 100 °C for 4 h, and then allowed to room temperature. The reaction was quenched by saturated aqueous NaCl (1 mL). The yield was determined by GC with tridecane as the internal standard.

## 6. References

1. R. Liang, S. Li, R. Wang, L. Lu, F. Li, *Org. Lett.* **2017**, *19*, 5790–5793.
2. M. Huang, Y. Li, Y. Li, J. Liu, S. Shu, Y. Liu, Z. Ke, *Chem. Commun.* **2019**, *55*, 6213.
3. A. Teichert, K. Jantos, K. Harms, A. Studer, *Org. Lett.* **2004**, *6*, 3477–3480.
4. J. Neumann, S. Elangovan, A. Spannenberg, K. Junge, M. Beller, *Chem. Eur. J.* **2017**, *23*, 5410.
5. H. Wang, H. Yuan, B. Yang, X. Dai, S. Xu, F. Shi, *ACS Catal.* **2018**, *8*, 3943–3949.
6. F. Li, J. Xie, H. Shan, C. Sun, L. Chen, *RSC Adv.* **2012**, *2*, 8645–8652.
7. Z. Liu, Z. Yang, X. Yu, H. Zhang, B. Yu, Y. Zhao, Z. Liu, *Adv. Synth. Catal.* **2017**, *359*, 4278–4283.
8. D. Wang, D. Kuang, F. Zhang, C. Yang, X. Zhu, *Adv. Synth. Catal.* **2015**, *357*, 714–718.
9. X. Zhao, M. Wu, Y. Liu, S. Cao, *Org. Lett.* **2018**, *20*, 5564–5568.
10. L. Wang, H. Neumann, M. Beller, *Angew. Chem. Int. Ed.* **2019**, *58*, 5417.
11. Z. Wu, H. Xu, *Angew. Chem. Int. Ed.* **2017**, *56*, 4734.
12. IDEAYA Biosciences, INC, USA Patent WO2020160134A1, **2020**.
13. T. Wang, M. Hoffmann, A. Dreuw, E. Hasagić, C. Hu, P. M. Stein, S. Witzel, H. Shi, Y. Yang, M. Rudolph, F. Stuck, F. Rominger, M. Kerscher, P. Comba, A. S. K. Hashmi, *Adv. Synth. Catal.* **2021**, *363*, 2783.
14. G. Choi, S. H. Hong, *Angew. Chem. Int. Ed.* **2018**, *57*, 6166–6170.
15. Y. Zhang, H. Zhang, K. Gao, *Org. Lett.* **2021**, *23*, 8282–8286.
16. M. Chandrasekharam, B. Chiranjeevi, K. S. V. Gupta, B. Sridhar, *J. Org. Chem.* **2011**, *76*, 10229–10235.
17. Y. Wu, H. Ding, M. Zhao, Z. Ni, J. Cao, *Green Chem.* **2020**, *22*, 4906–4911.
18. T. Murata, M. Hiyoshi, S. Maekawa, Y. Saiki, M. Ratanasak, J. Hasegawa, T. Ema, *Green Chem.* **2022**, *24*, 2385–2390.
19. K. L. Seim, A. C. Obermeyer, M. B. Francis, *J. Am. Chem. Soc.* **2011**, *133*, 16970–16976.
20. Y. Qiao, Q. Yang, E. J. Schelter, *Angew. Chem. Int. Ed.* **2018**, *57*, 10999.
21. M. Pengshung, P. Neal, T. L. Atallah, J. Kwon, J. R. Caram, S. A. Lopez, E. M. Sletten, *Chem. Commun.* **2020**, *56*, 6110.
22. S. Maji, A. Das, S. K. Mandal, *Chem. Sci.* **2021**, *12*, 12174–12180.
23. C. Yang, F. Zhang, G. Deng, H. Gong, *J. Org. Chem.* **2019**, *84*, 181–190.
24. P. Ni, L. Yang, Y. Shen, L. Zhang, Y. Ma, M. Sun, R. Cheng, J. Ye, *J. Org. Chem.* **2022**, *87*, 12677–12687.
25. J. C. Antilla, J. M. Baskin, T. E. Barder, S. L. Buchwald, *J. Org. Chem.* **2004**, *69*, 5578–5587.
26. K. L. Shepard, S. L. Graham, USA Patent US4668697A, **1987**.
27. Y. Ma, J. Hong, X. Yao, C. Liu, L. Zhang, Y. Fu, M. Sun, R. Cheng, Z. Li, J. Ye, *Org. Lett.* **2021**, *23*, 9387–9392.
28. C. A. Hoelzel, H. Hu, C. H. Wolstenholme, B. A. Karim, K. T. Munson, K. H.

- Jung, H. Zhang, Y. Liu, H. P. Yennawar, J. B. Asbury, X. Li, X. Zhang, *Angew. Chem. Int. Ed.* **2020**, *59*, 4785.
29. T. S. D. Vries, A. Prokofjevs, J. N. Harvey, E. Vedejs, *J. Am. Chem. Soc.* **2009**, *131*, 14679–14687.

## 7. $^1\text{H}$ and $^{13}\text{C}$ NMR Spectra

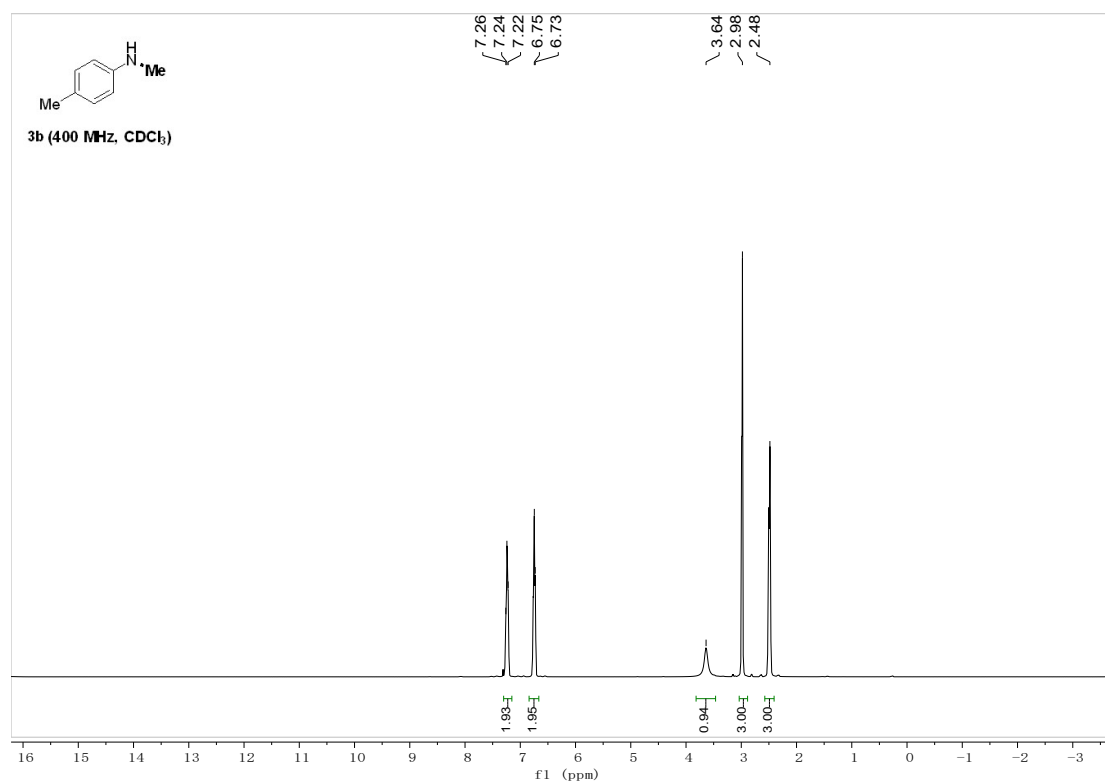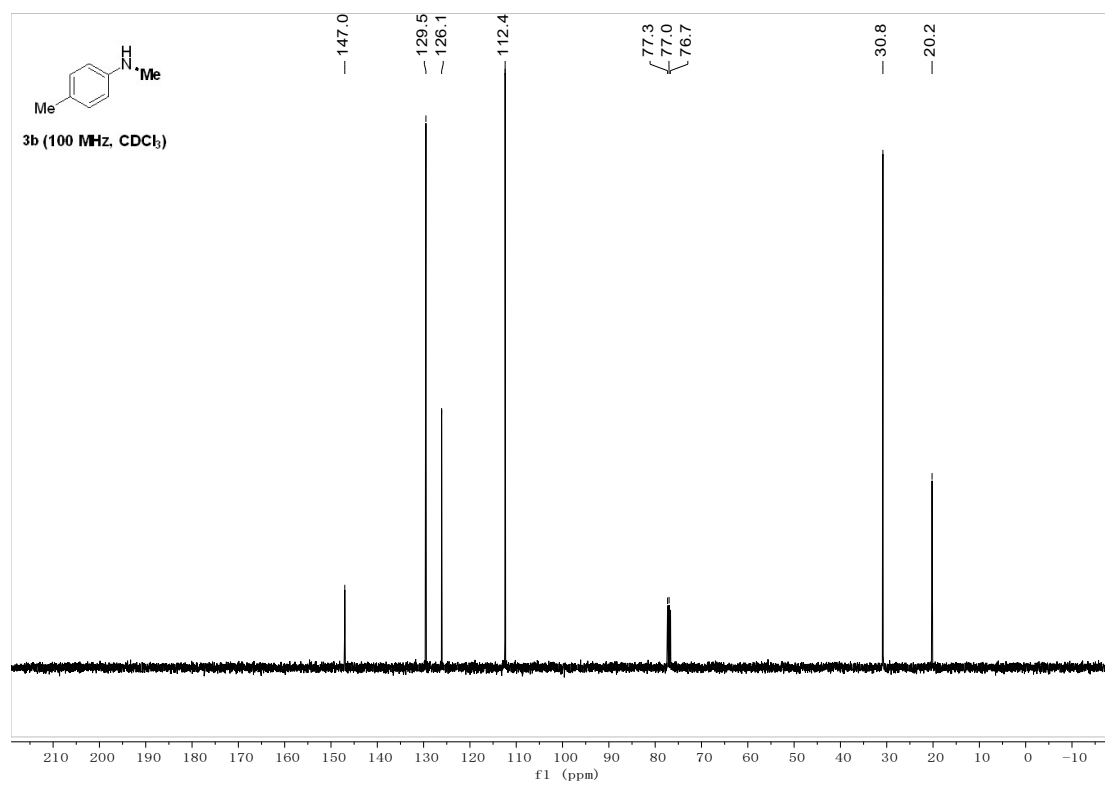

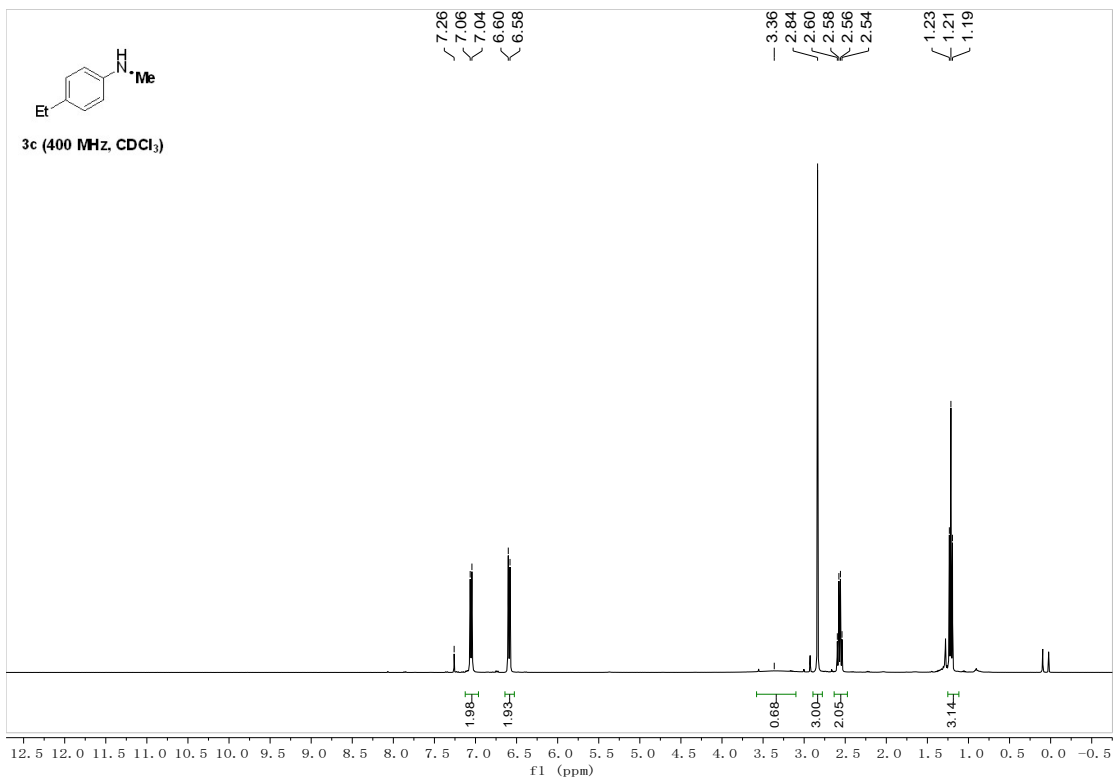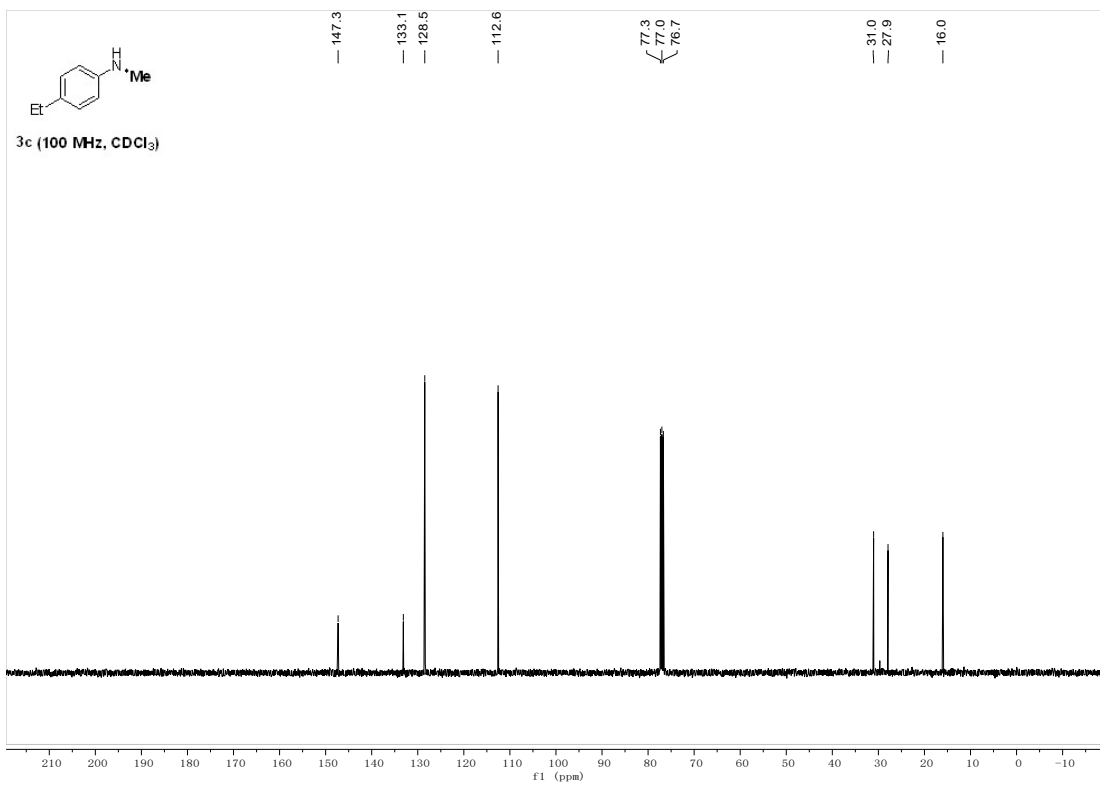

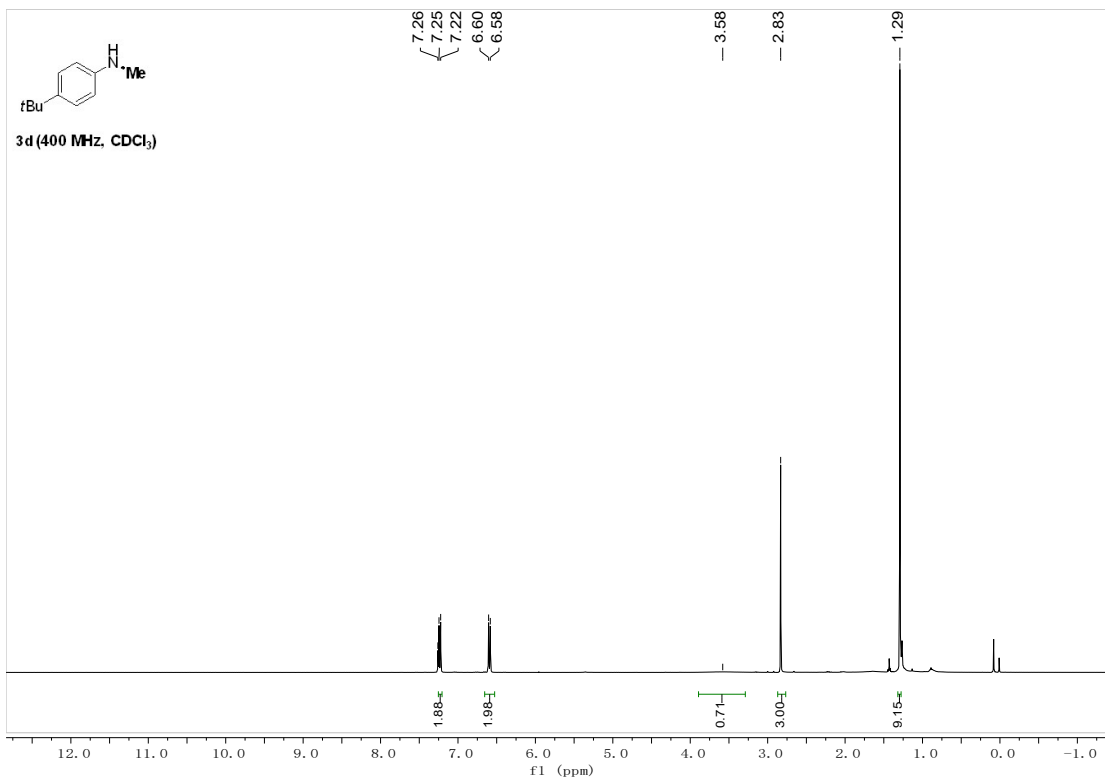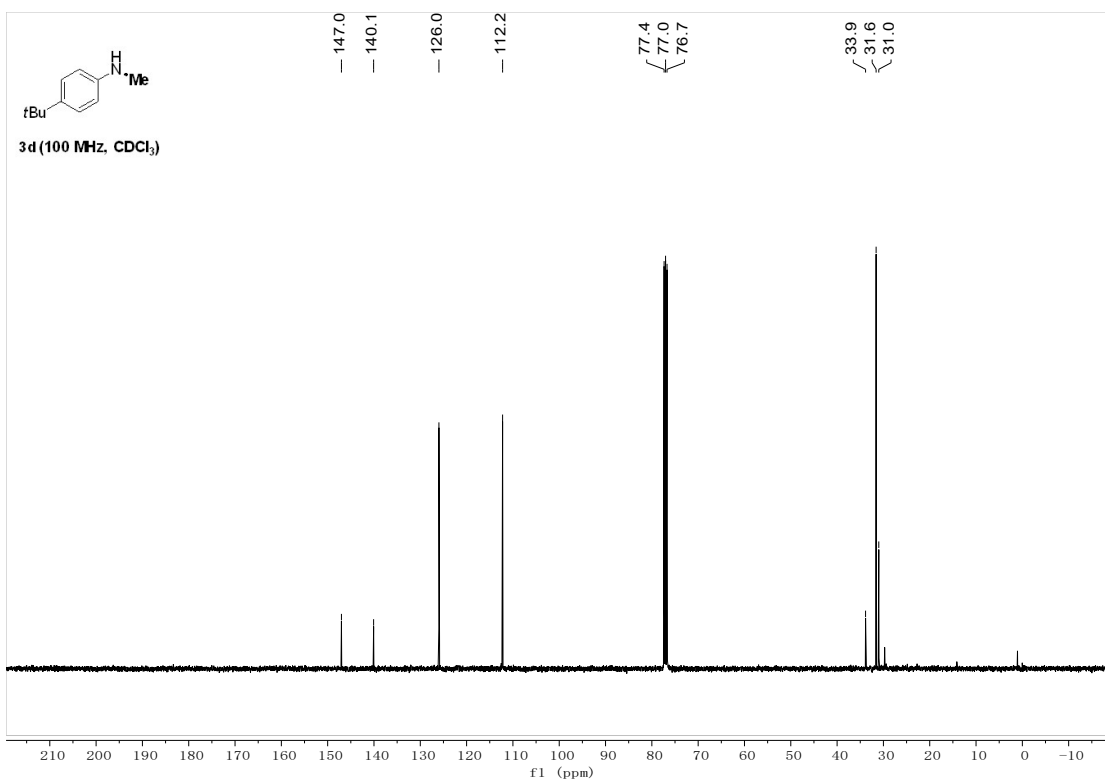

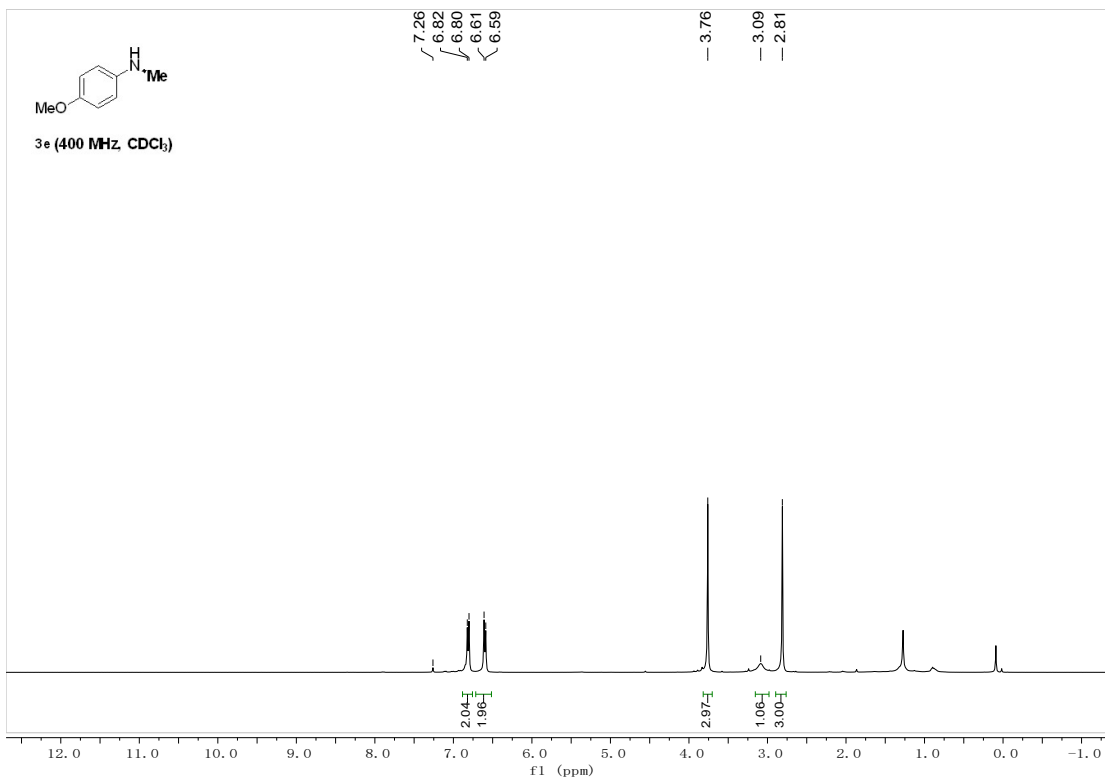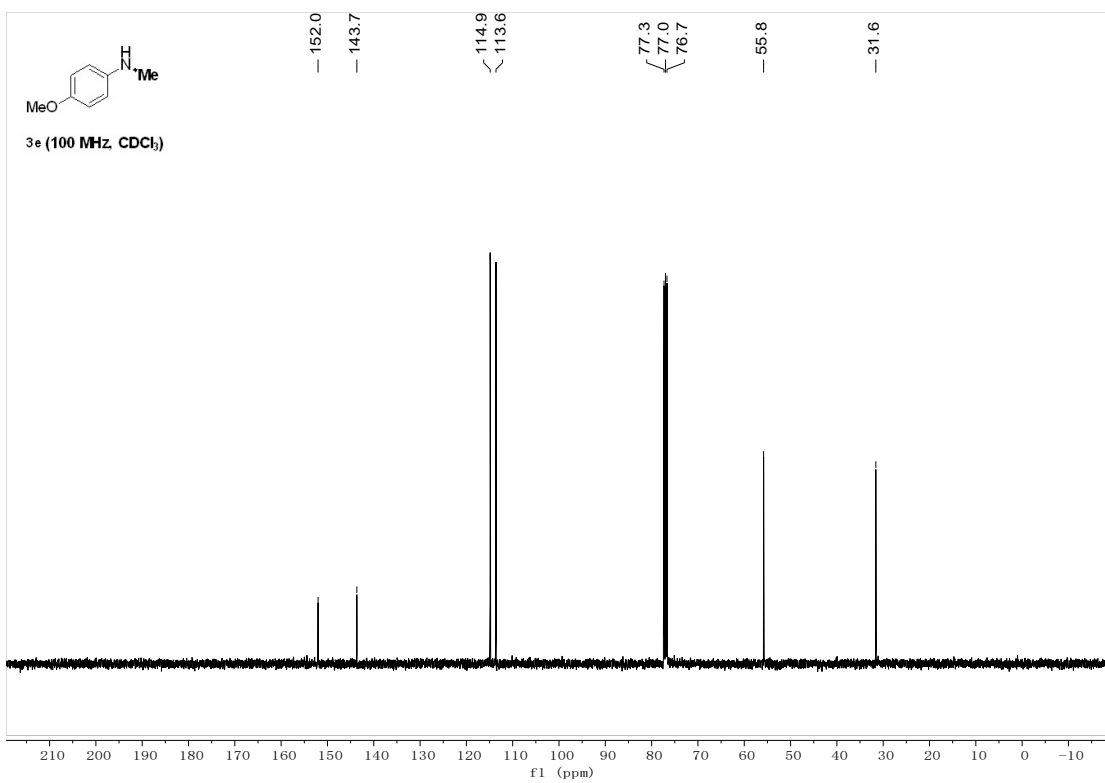

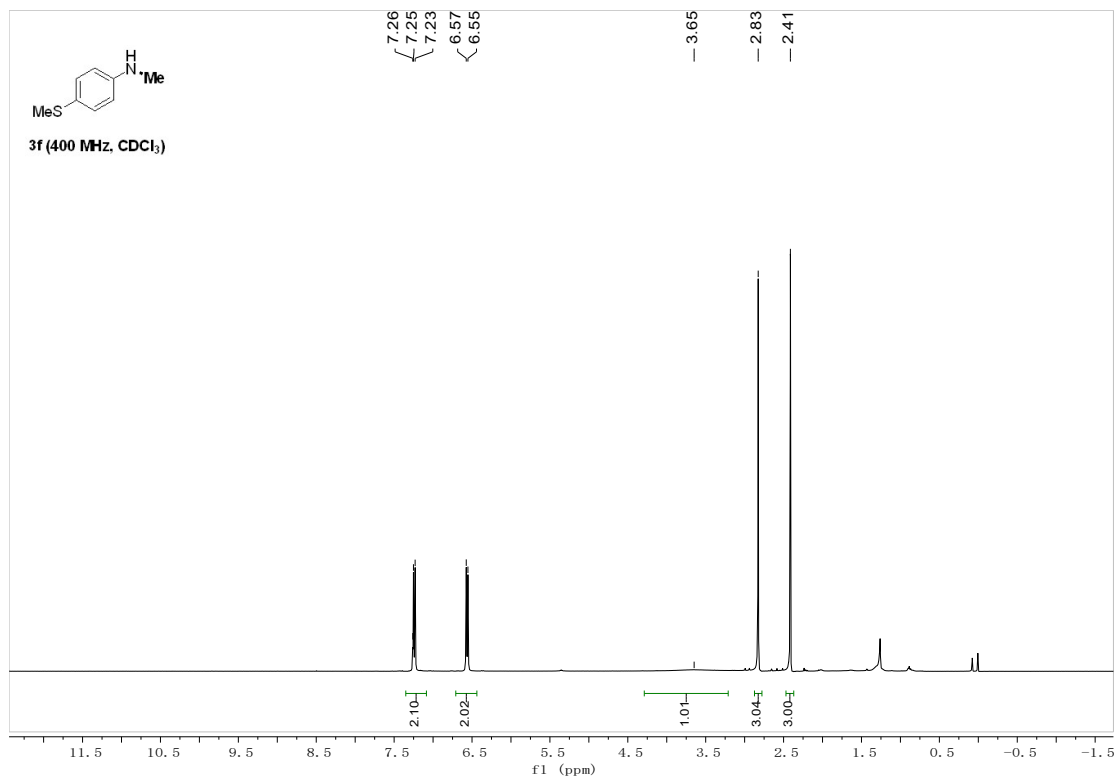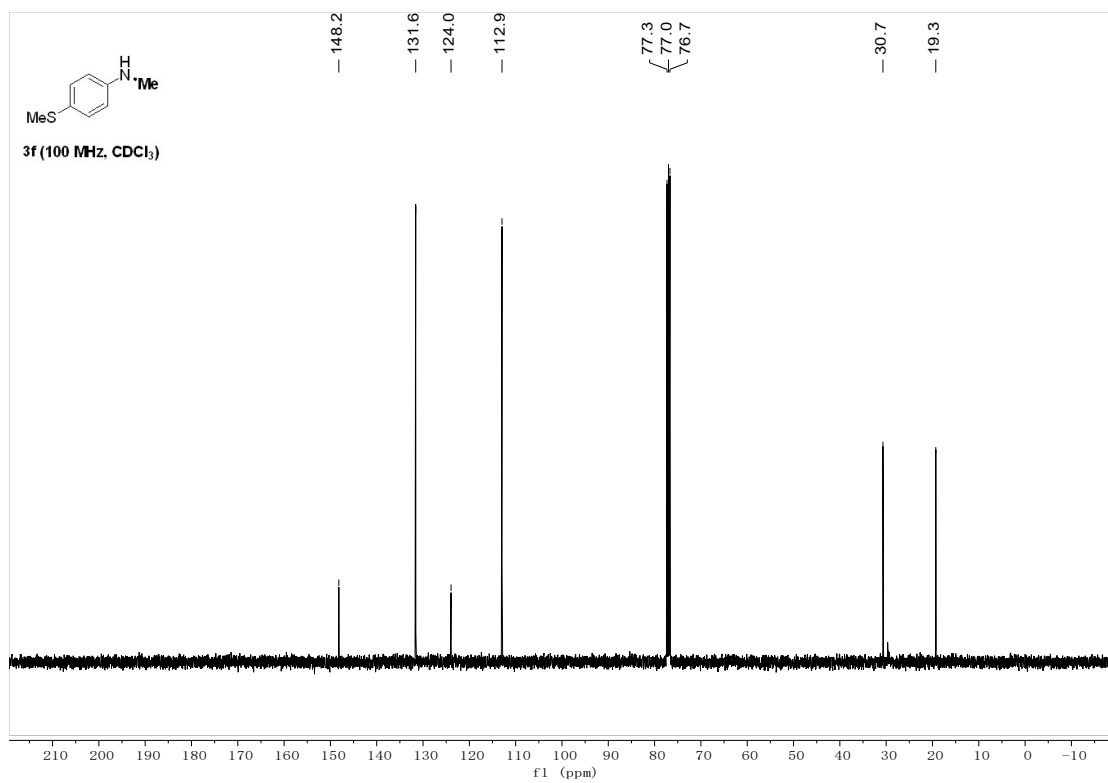



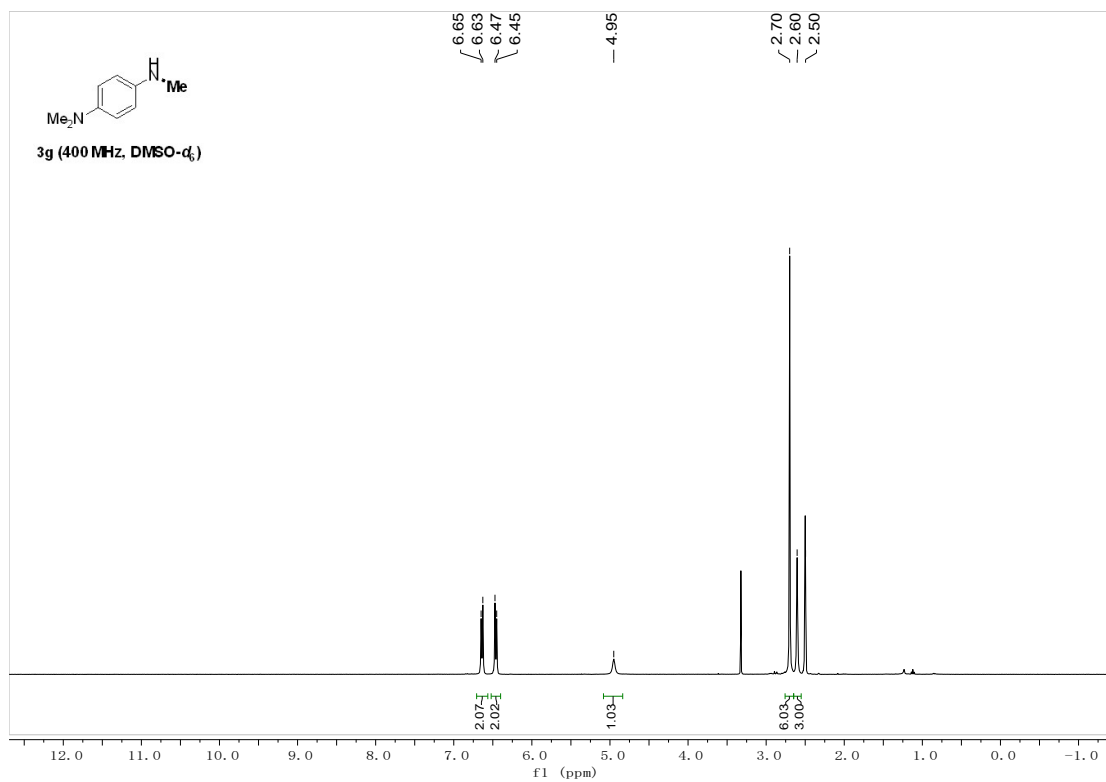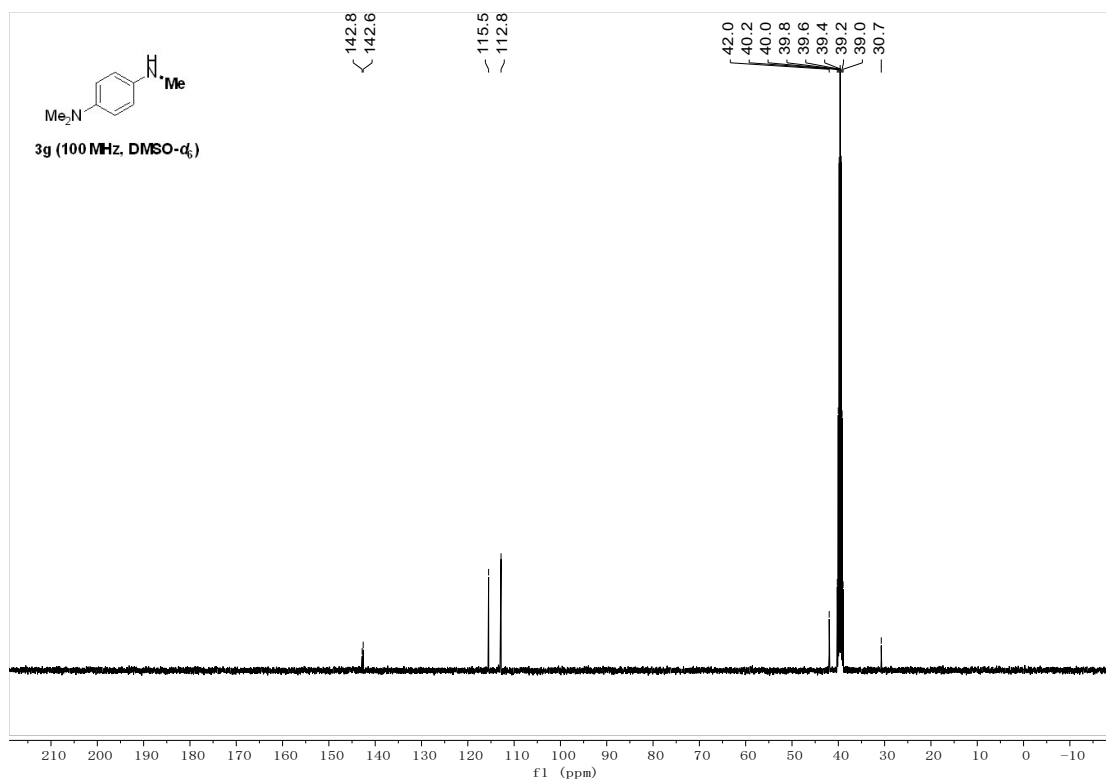

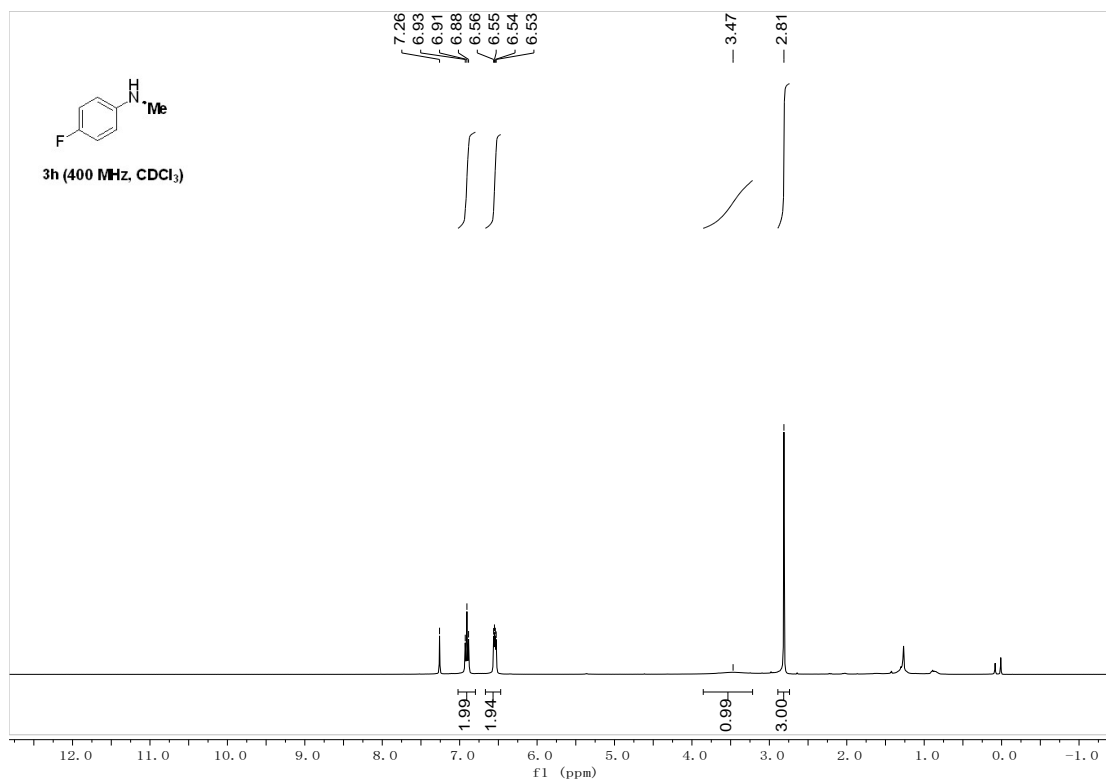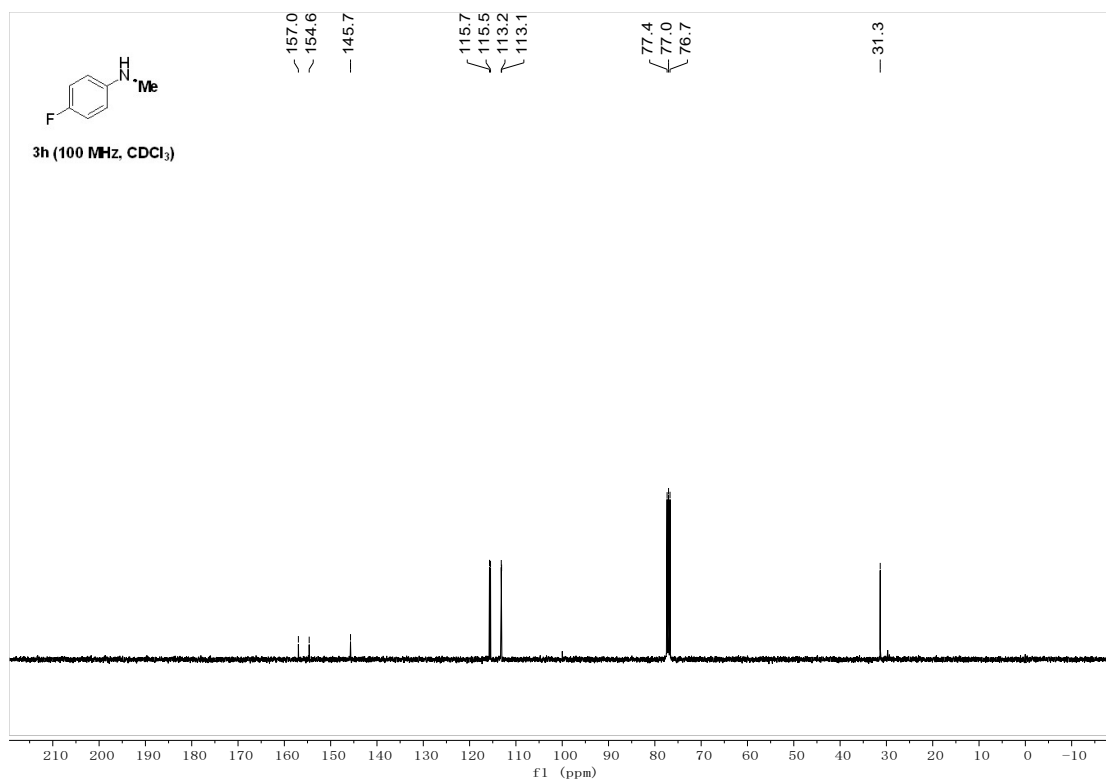

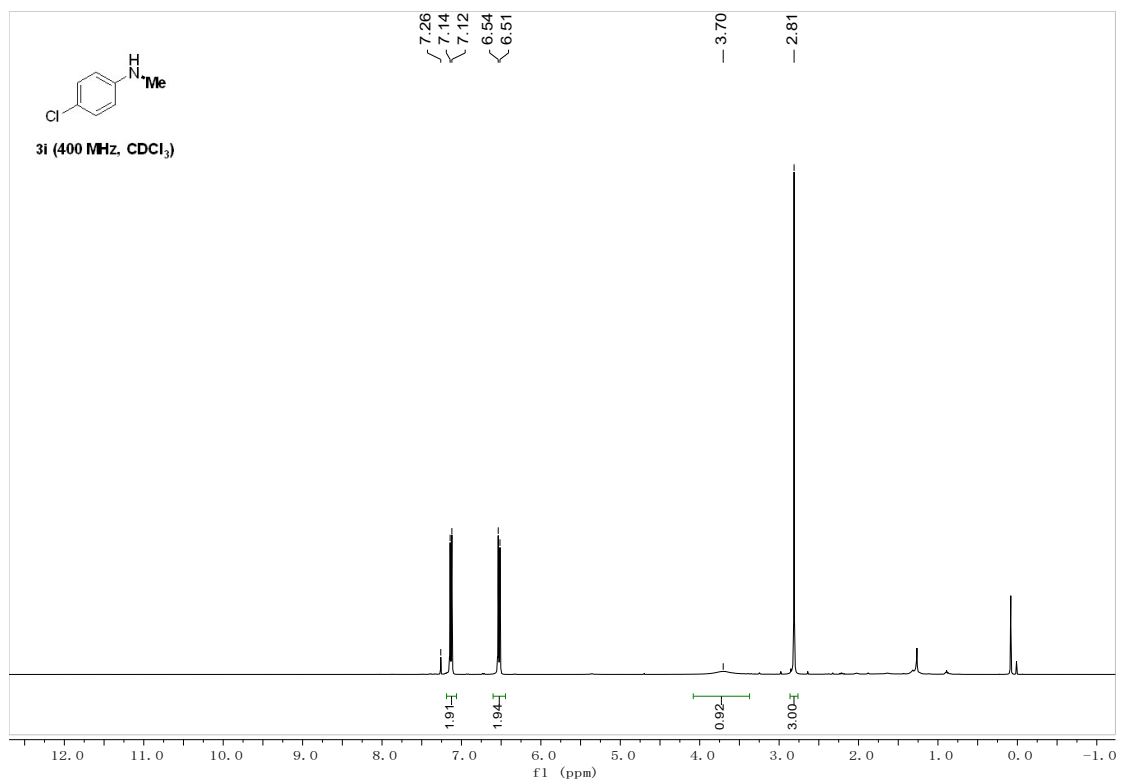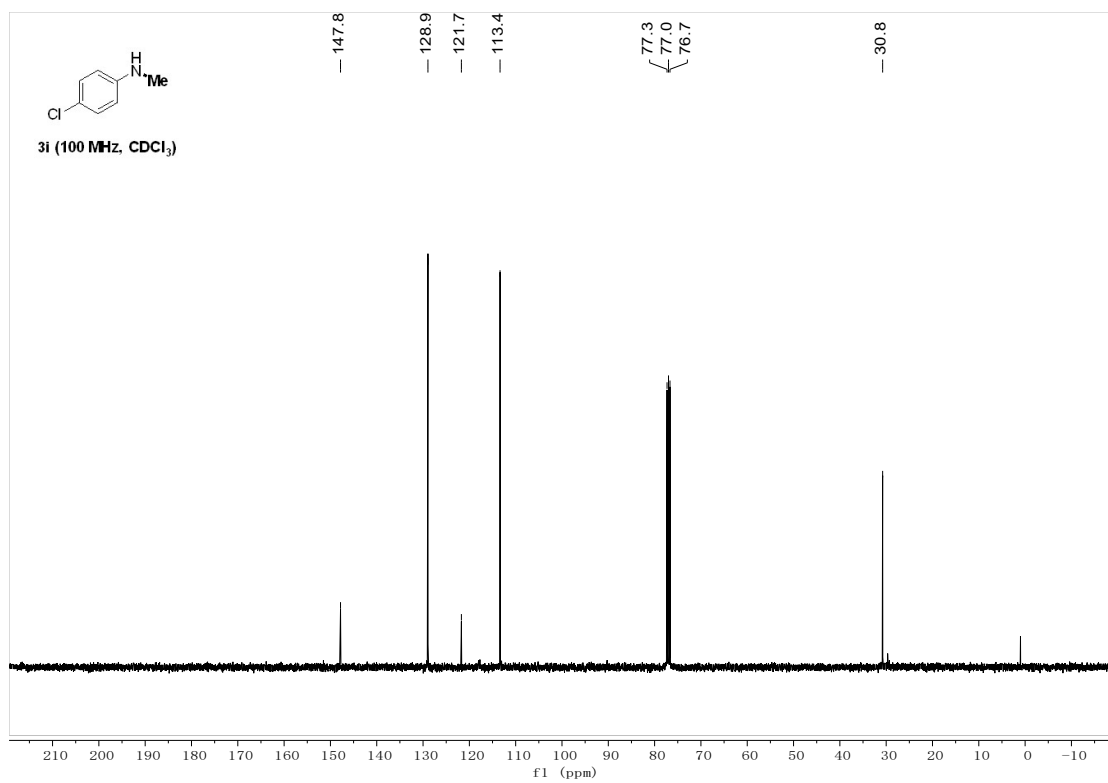

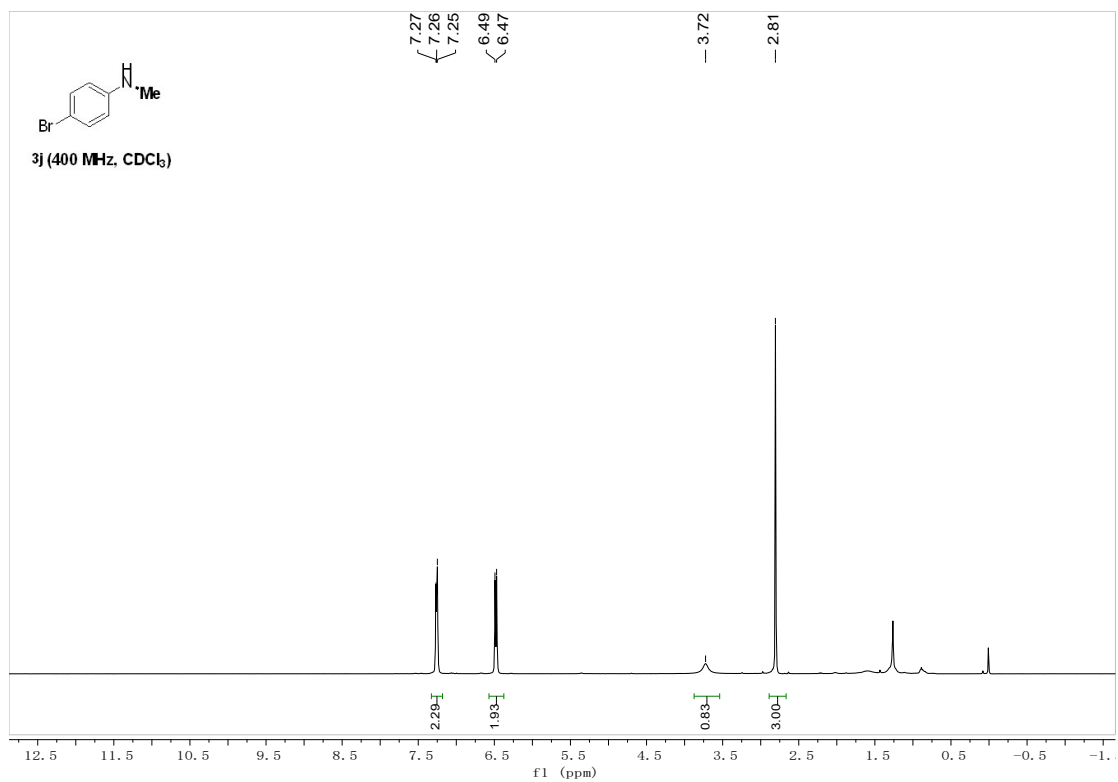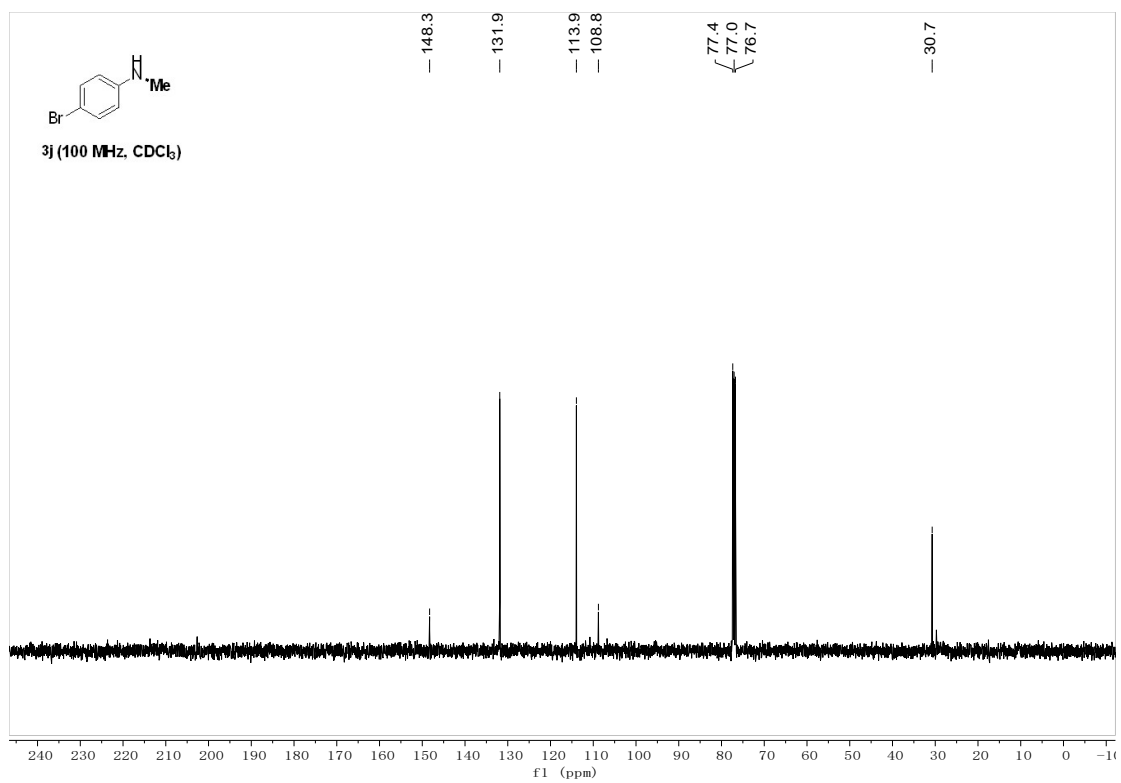

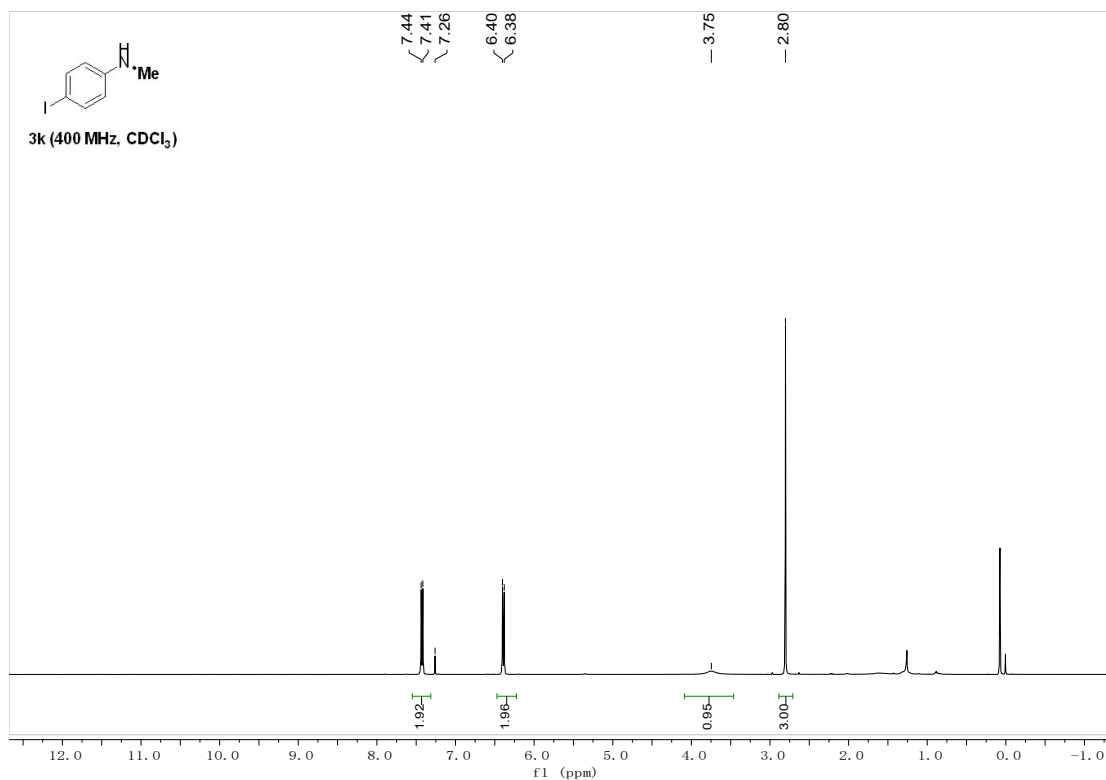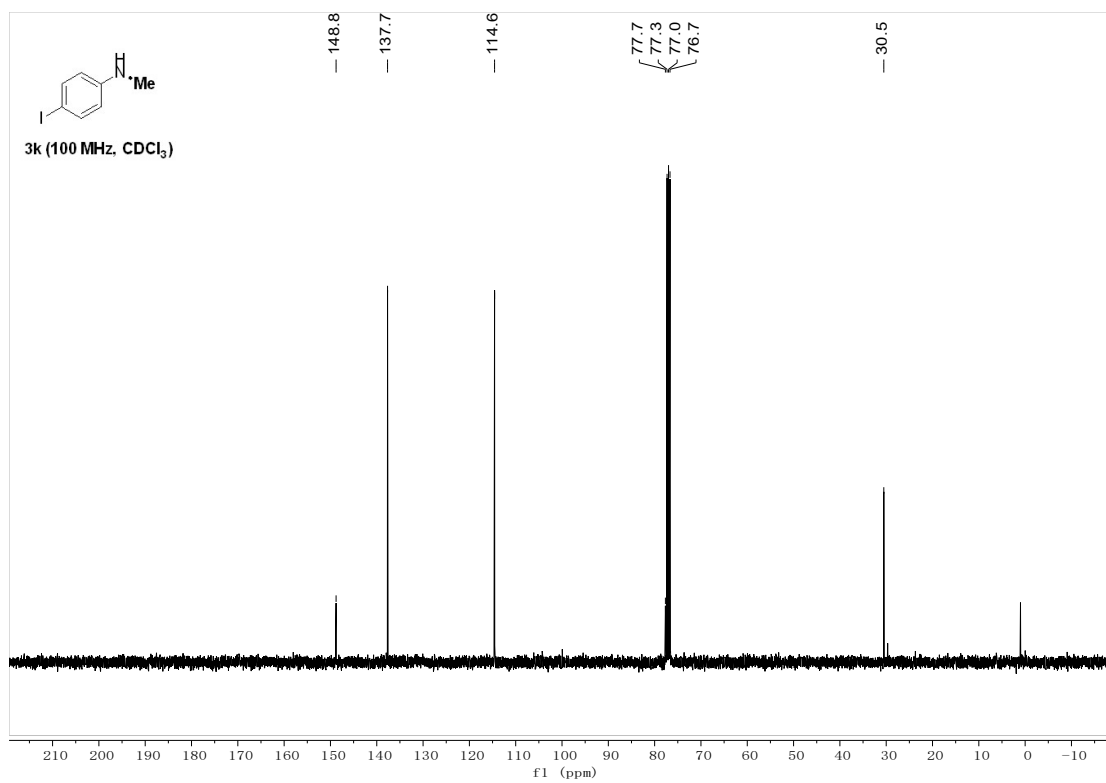

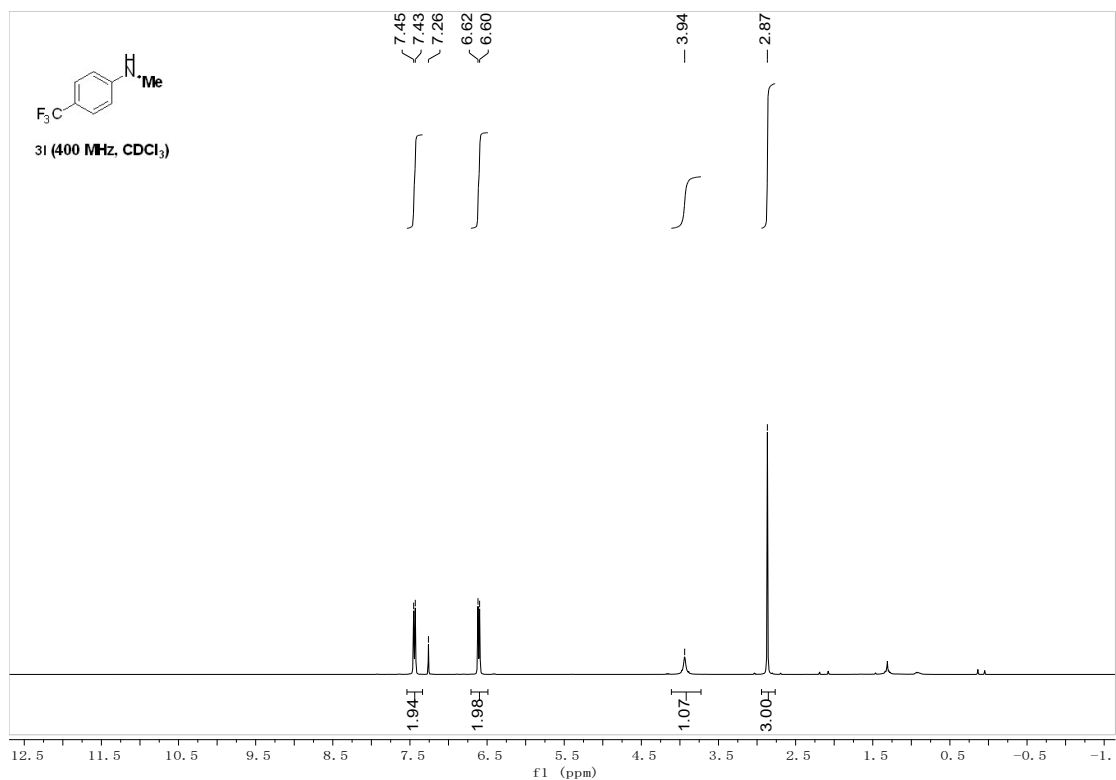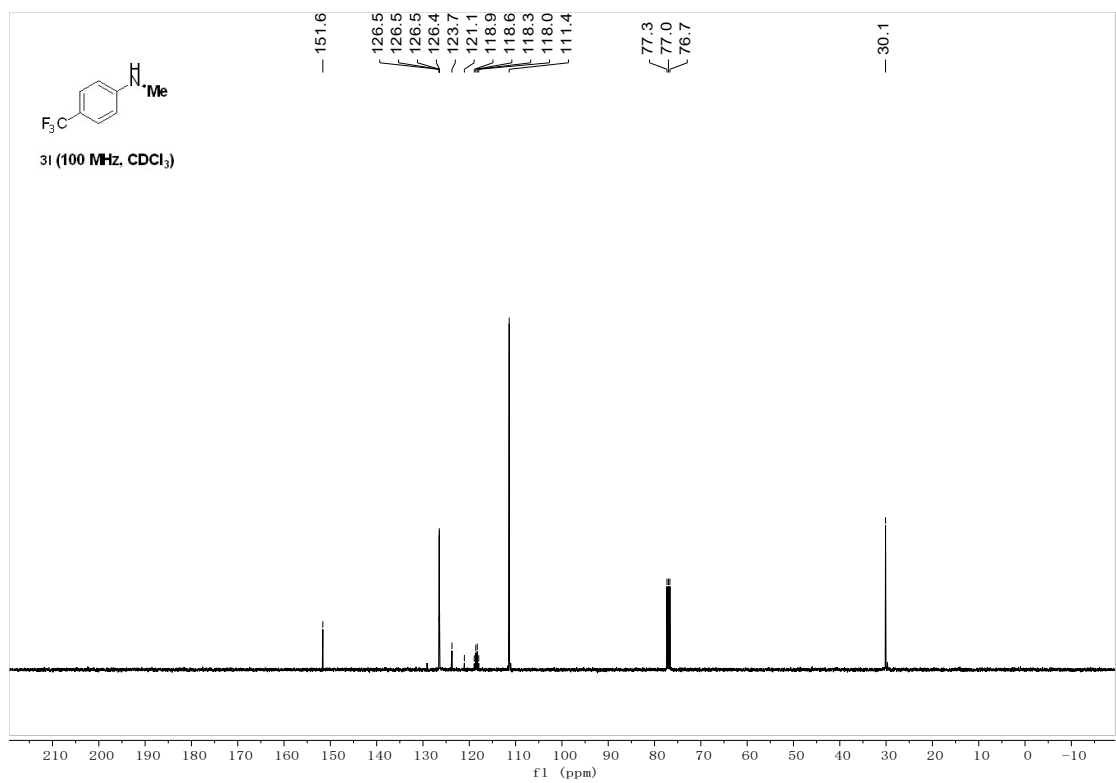

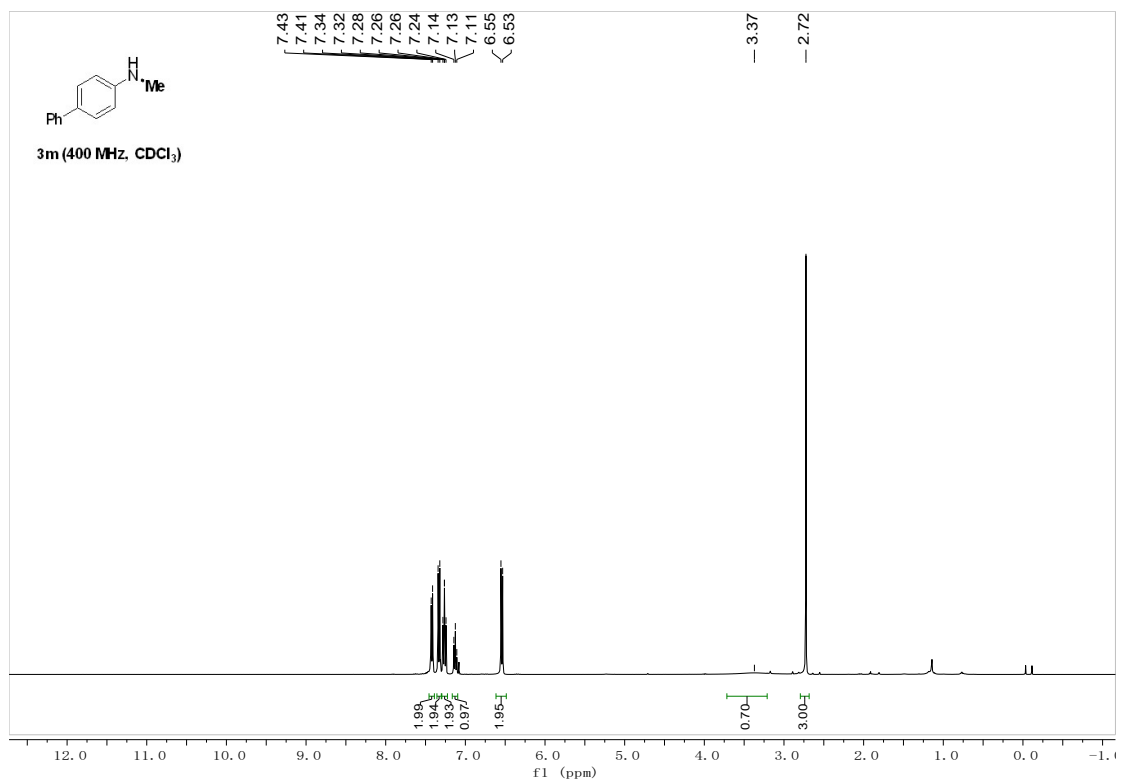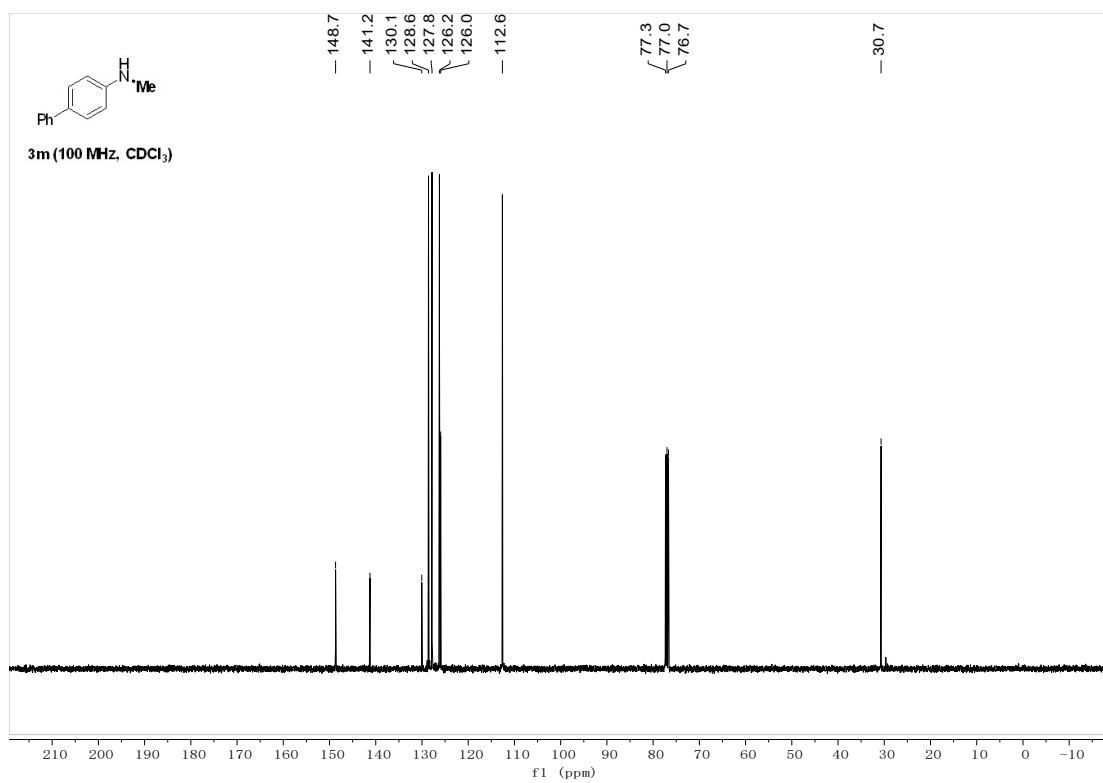

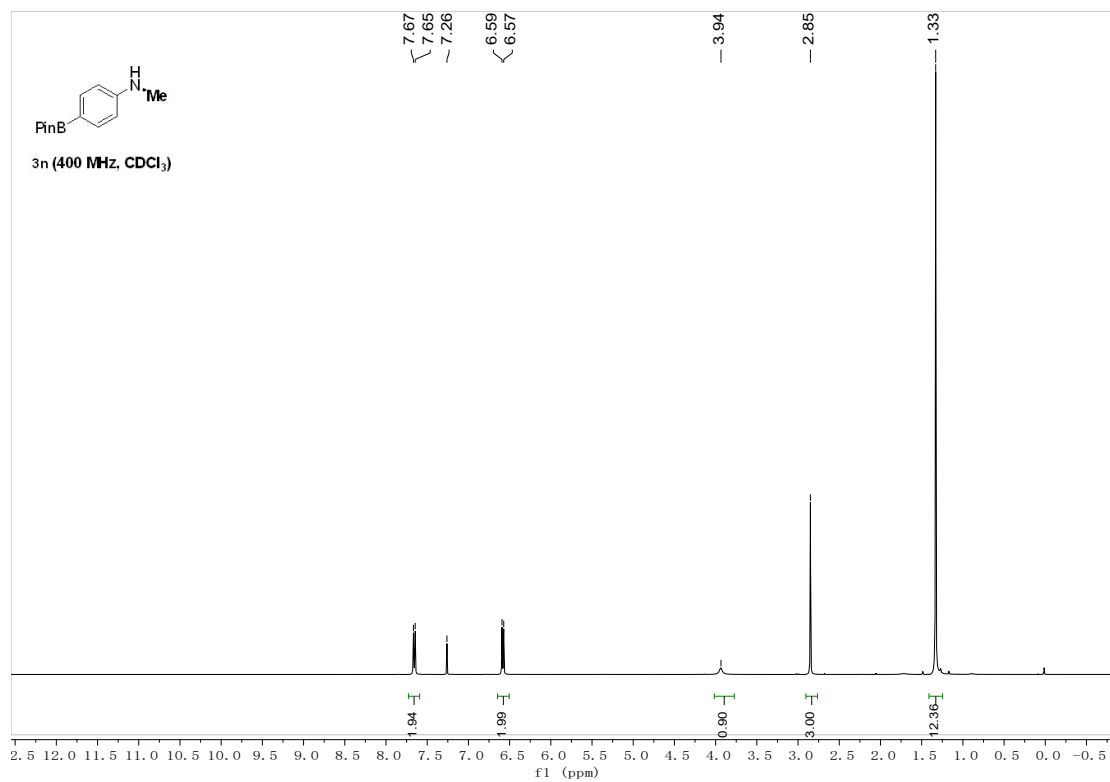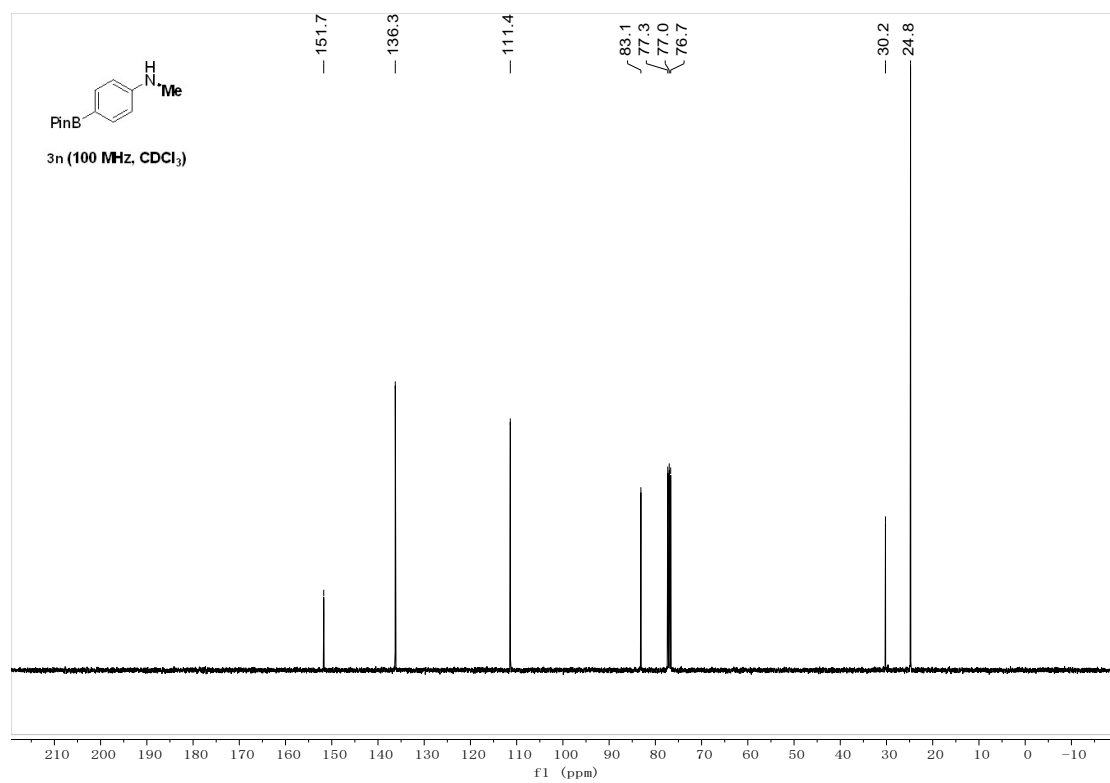



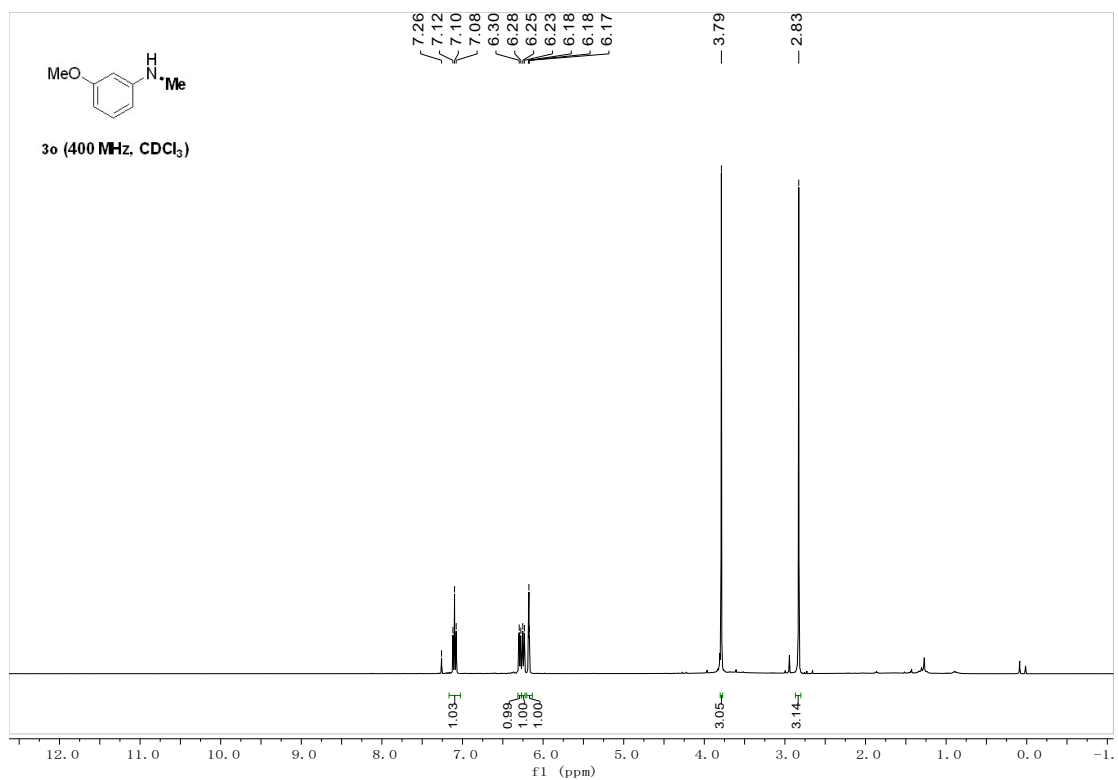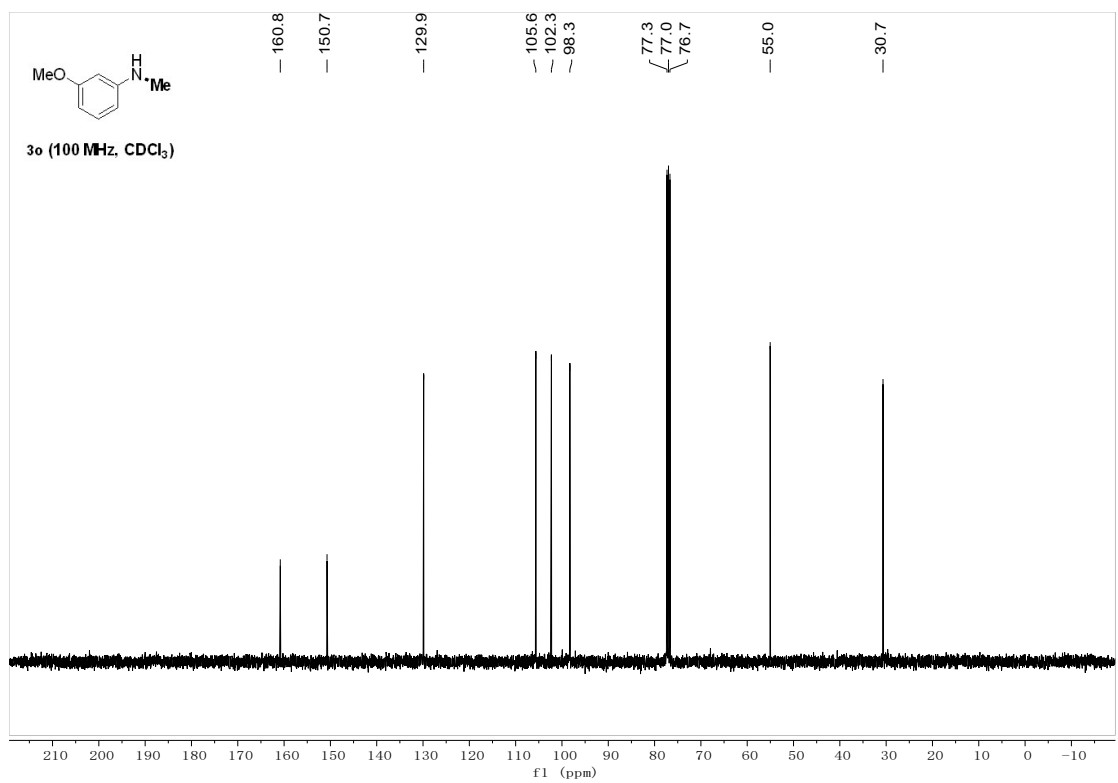

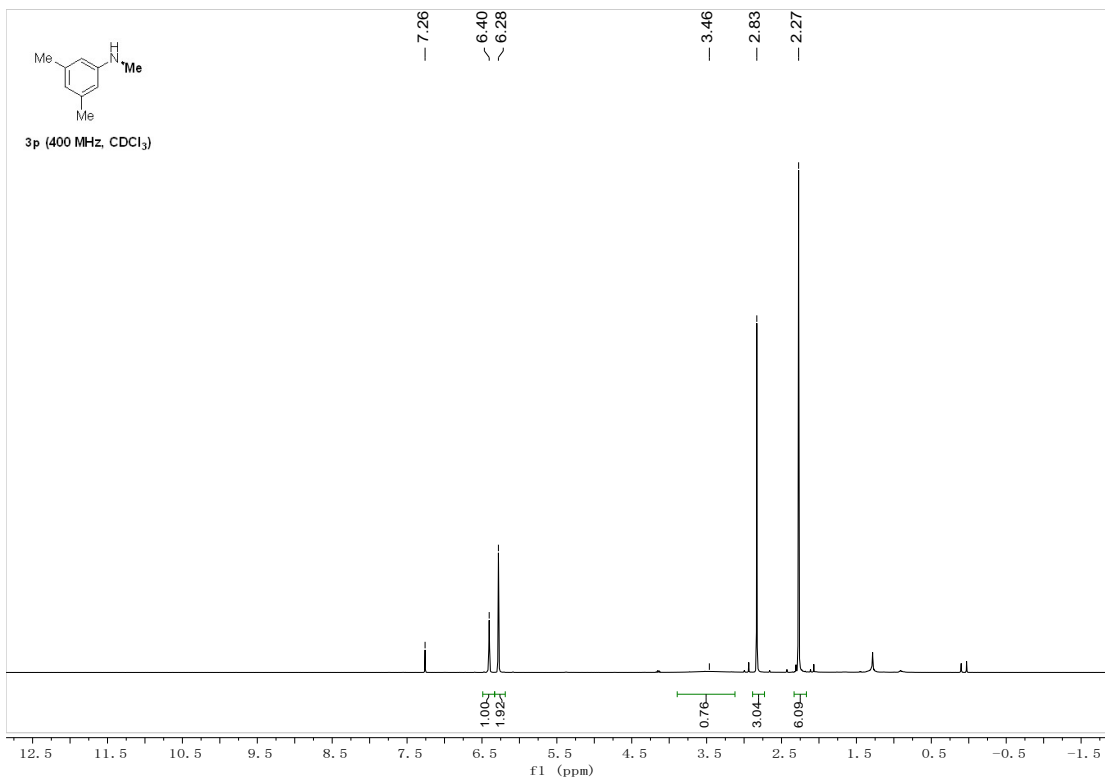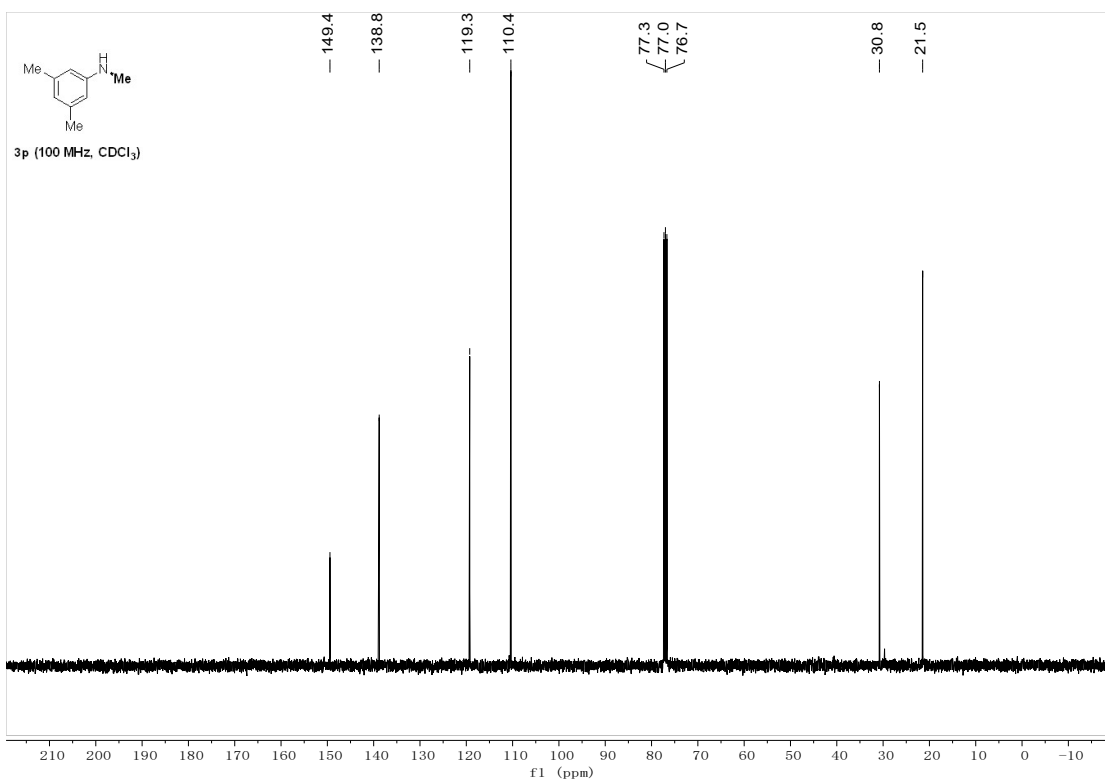

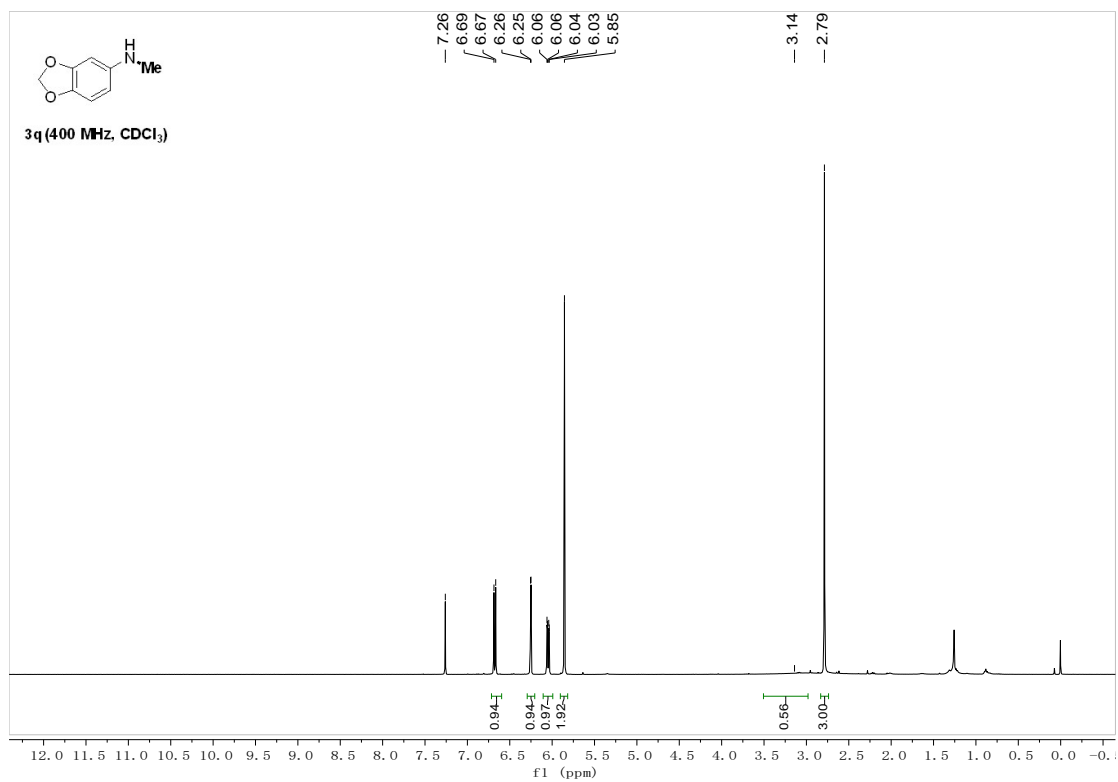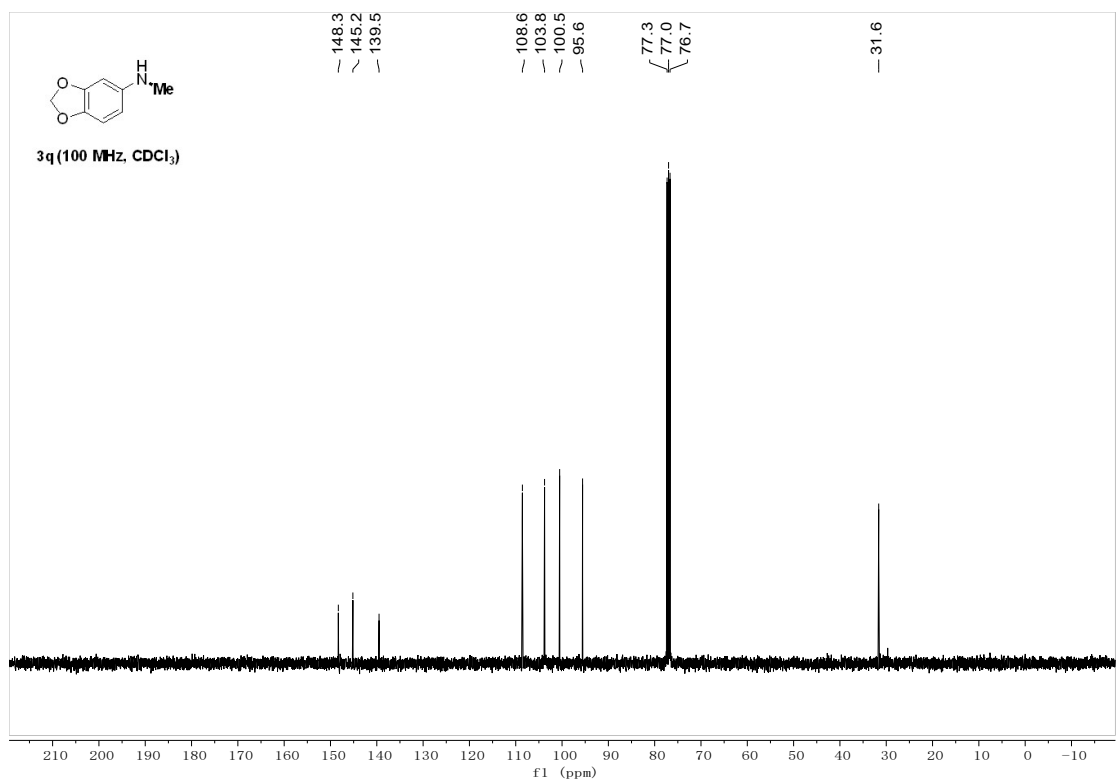

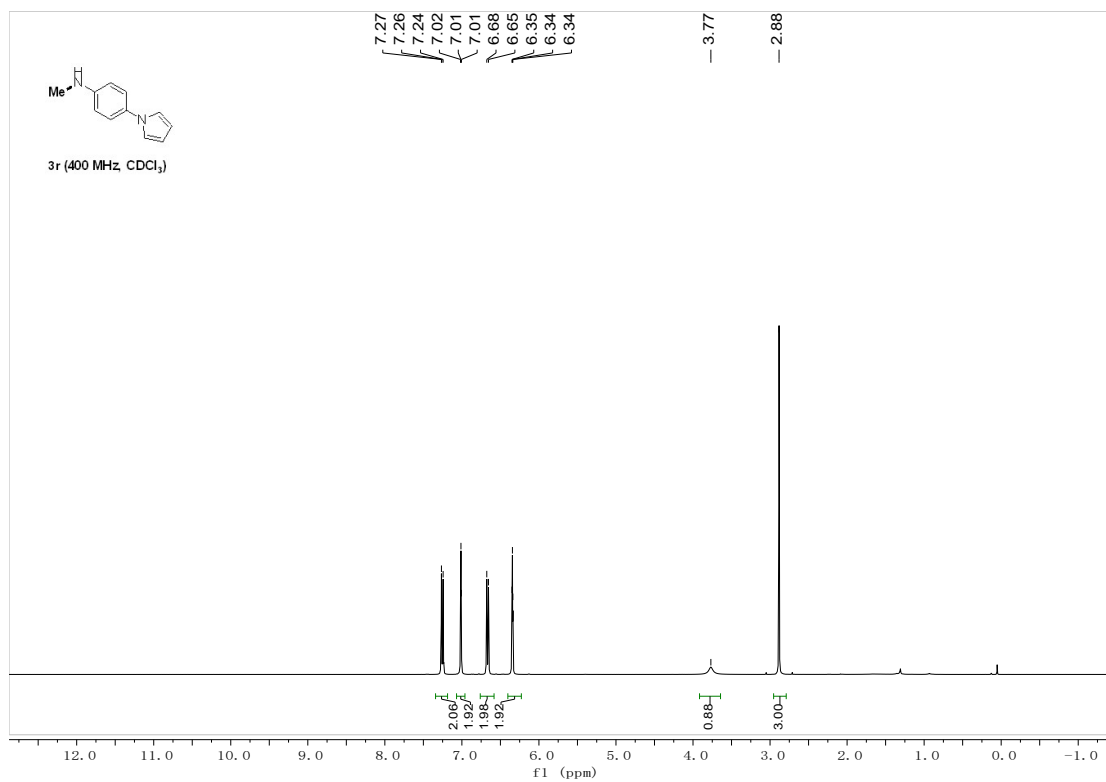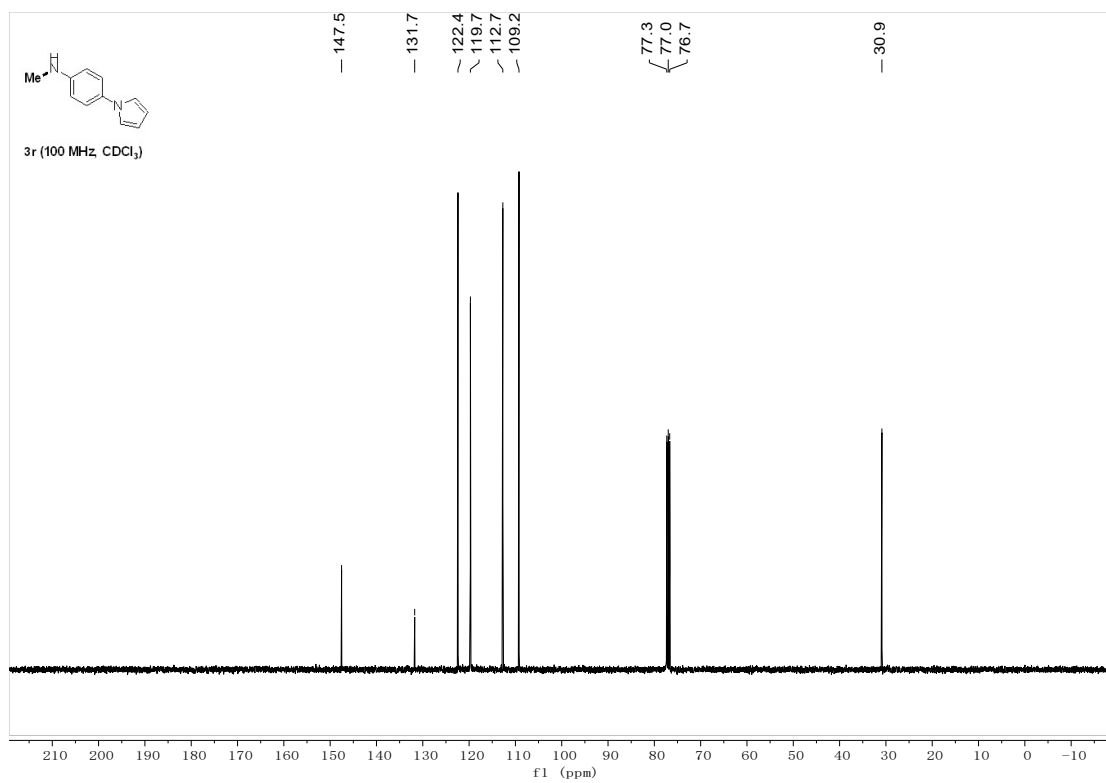

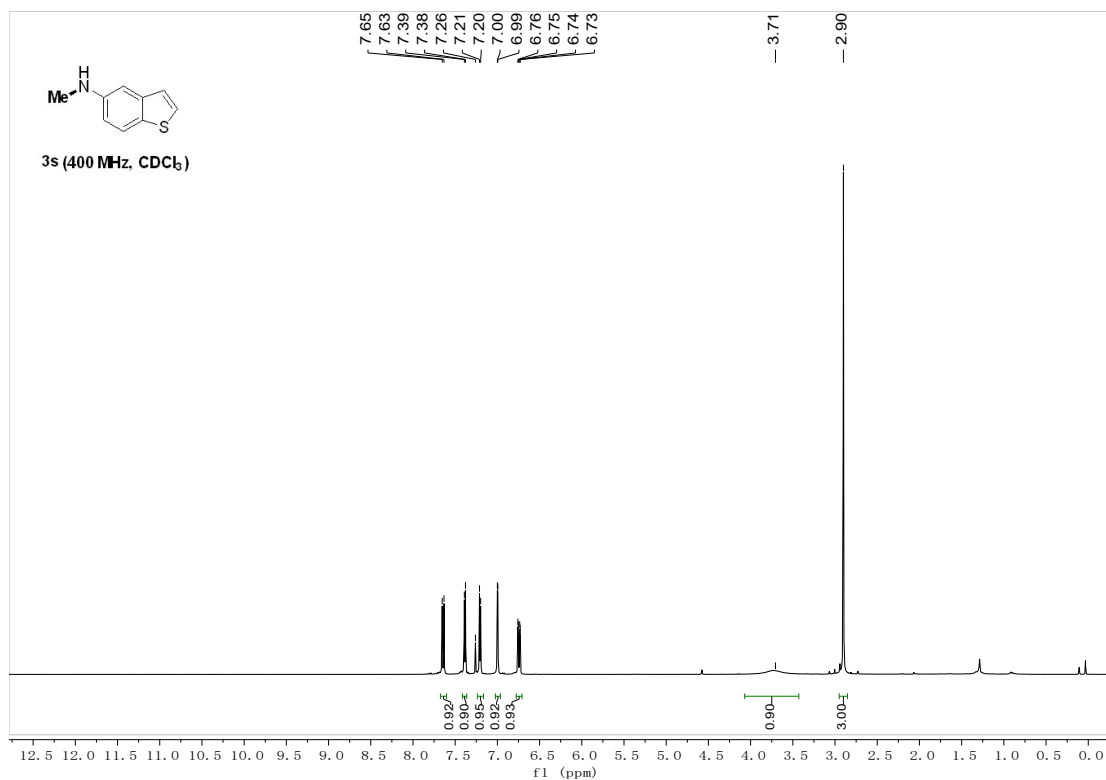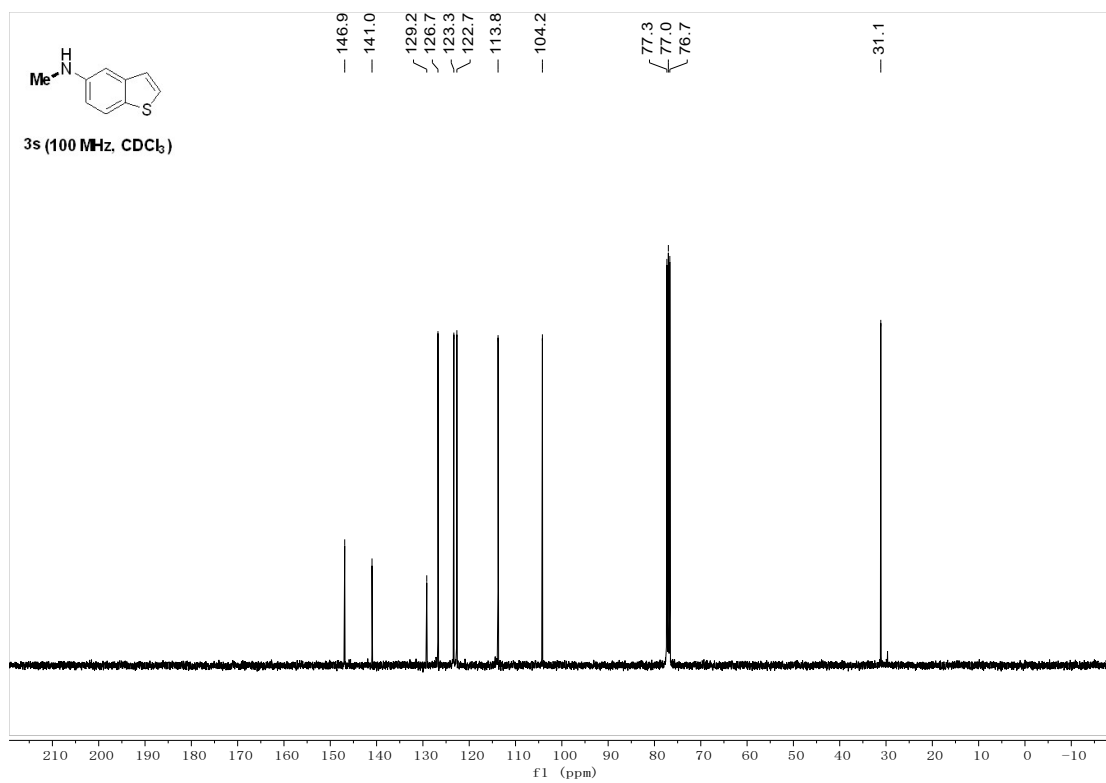

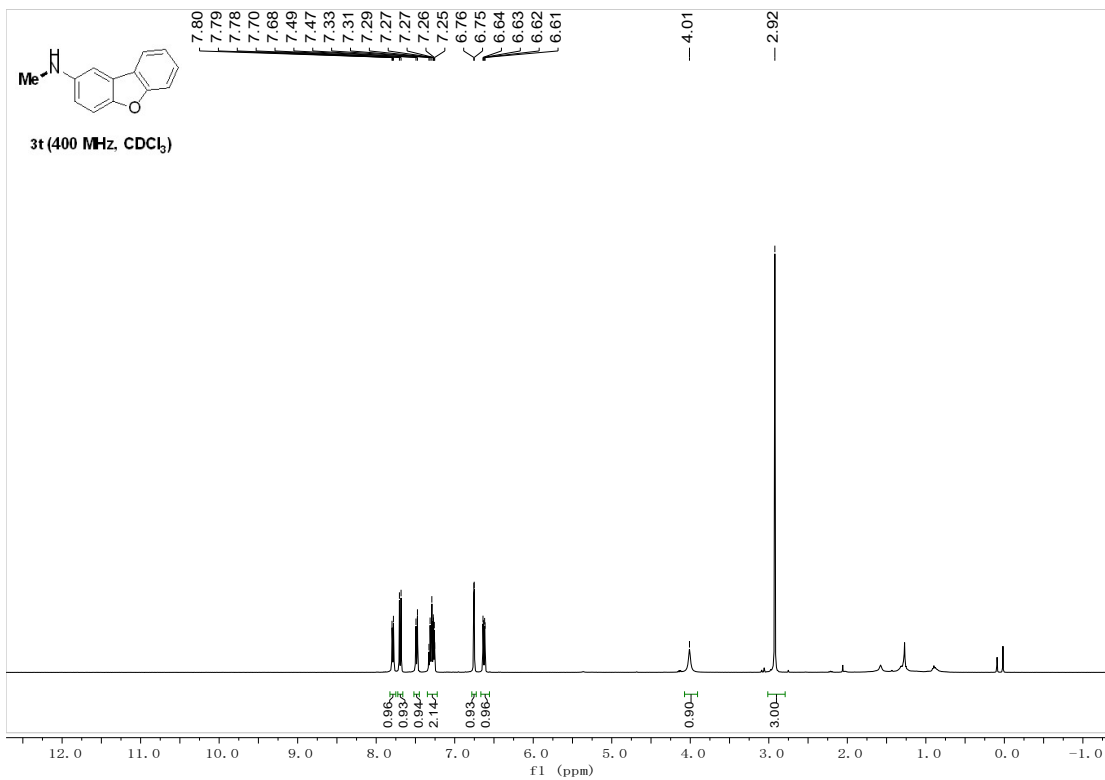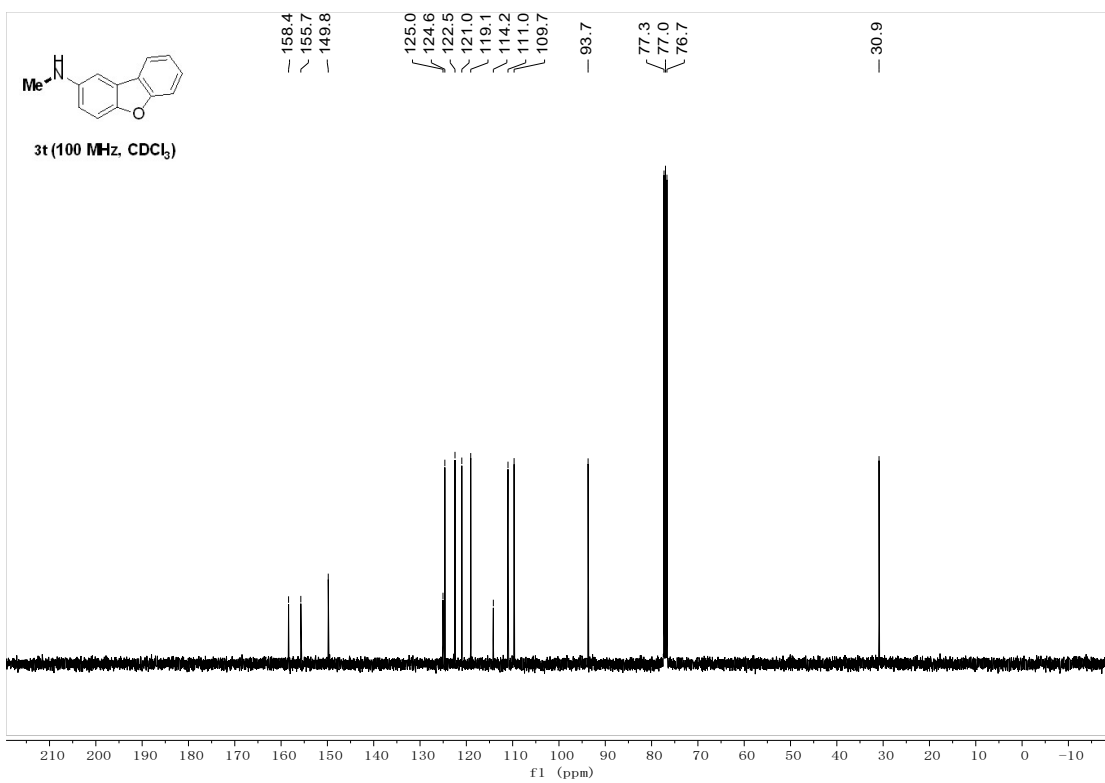

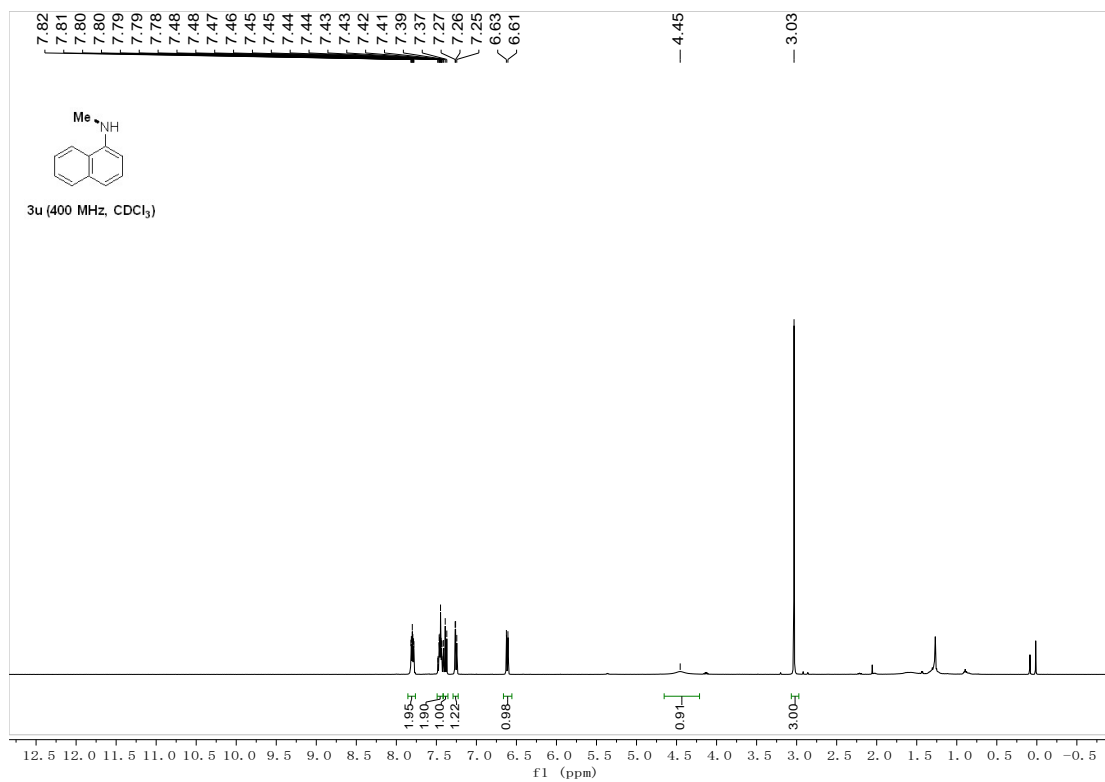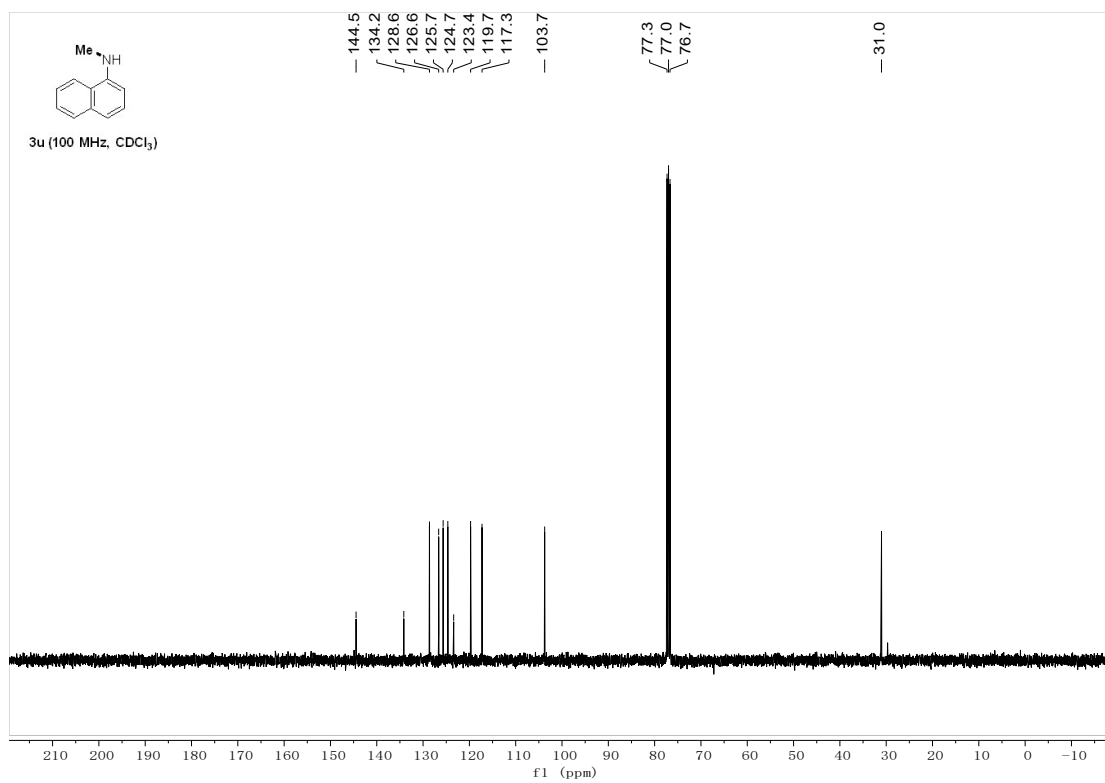

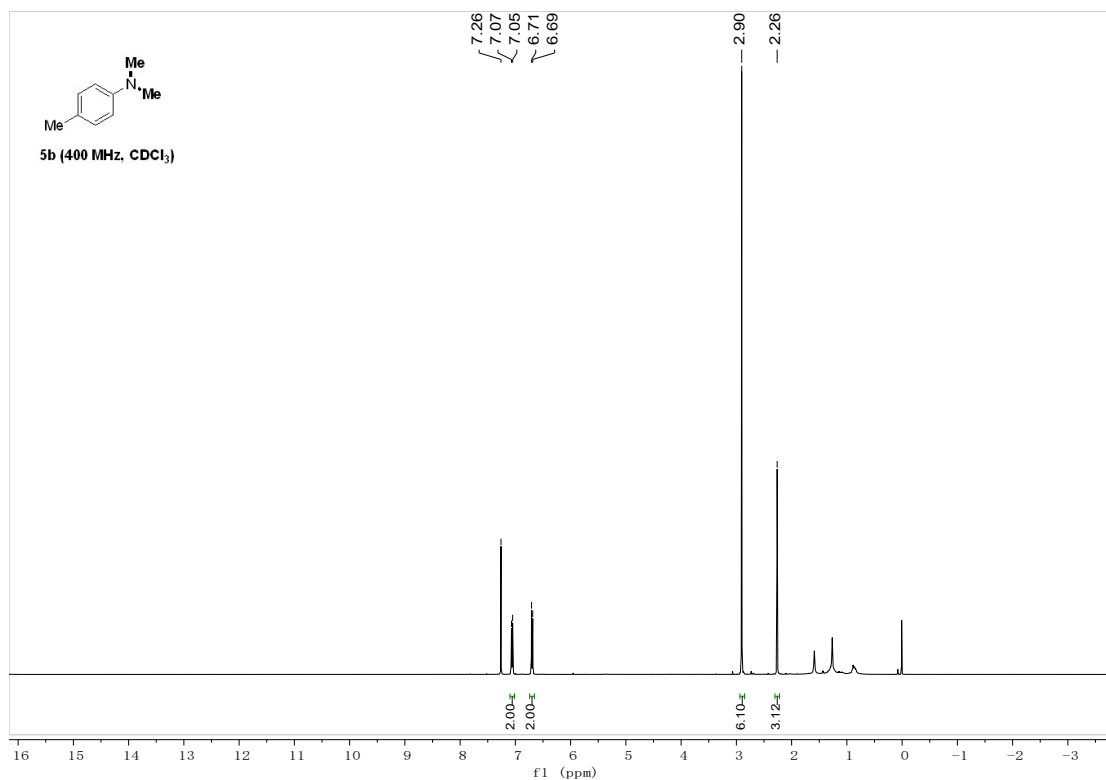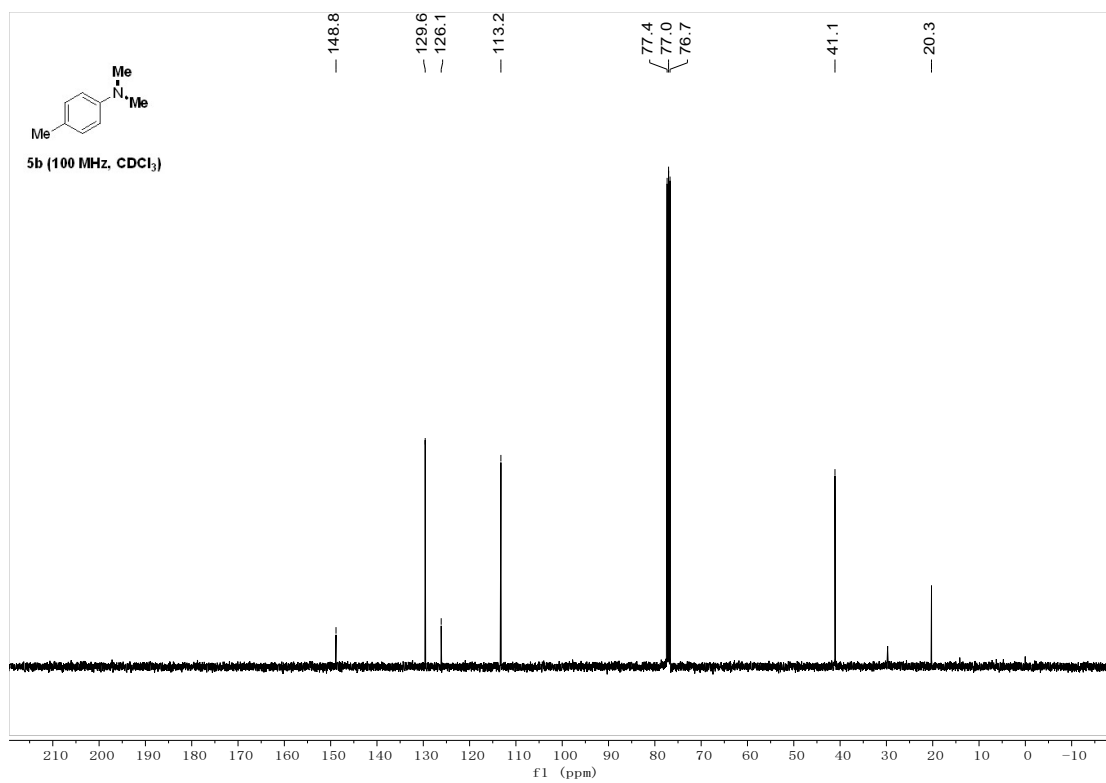



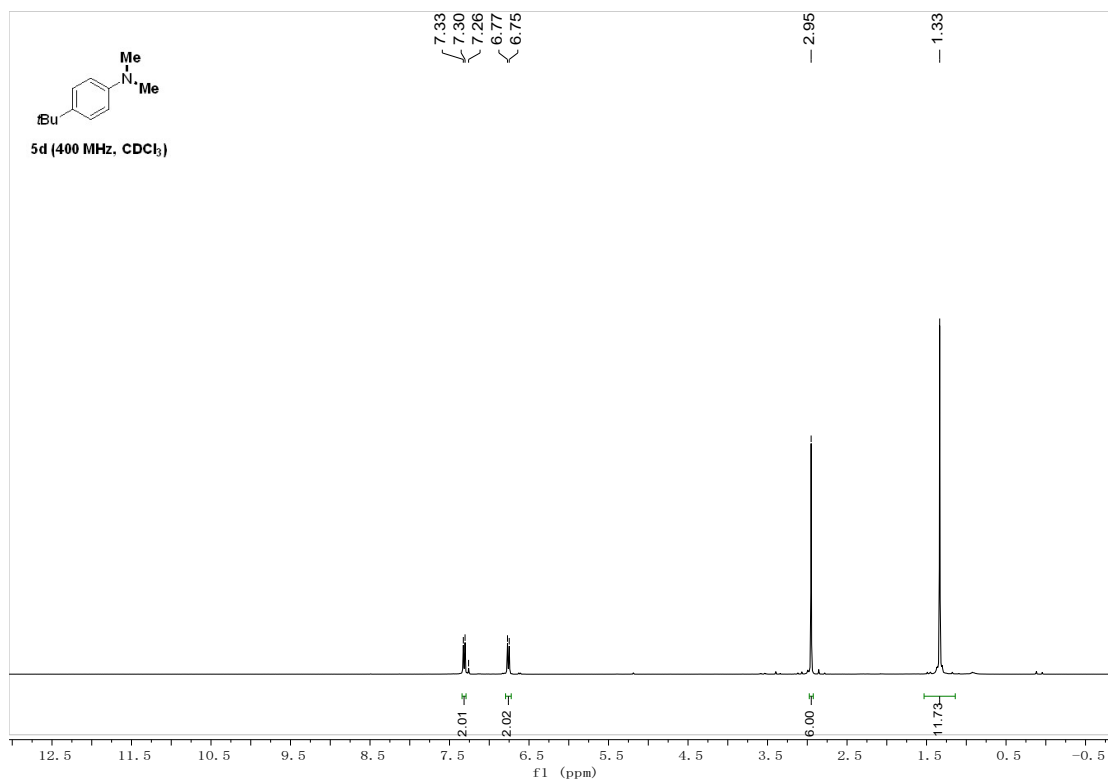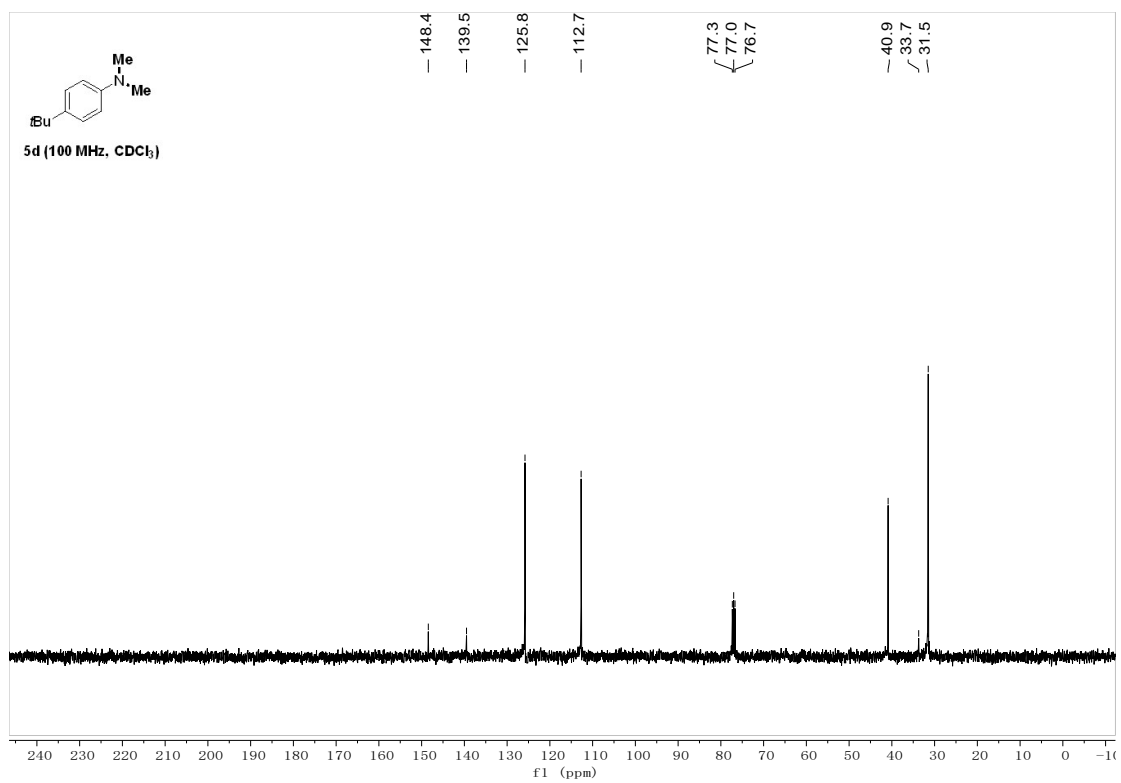

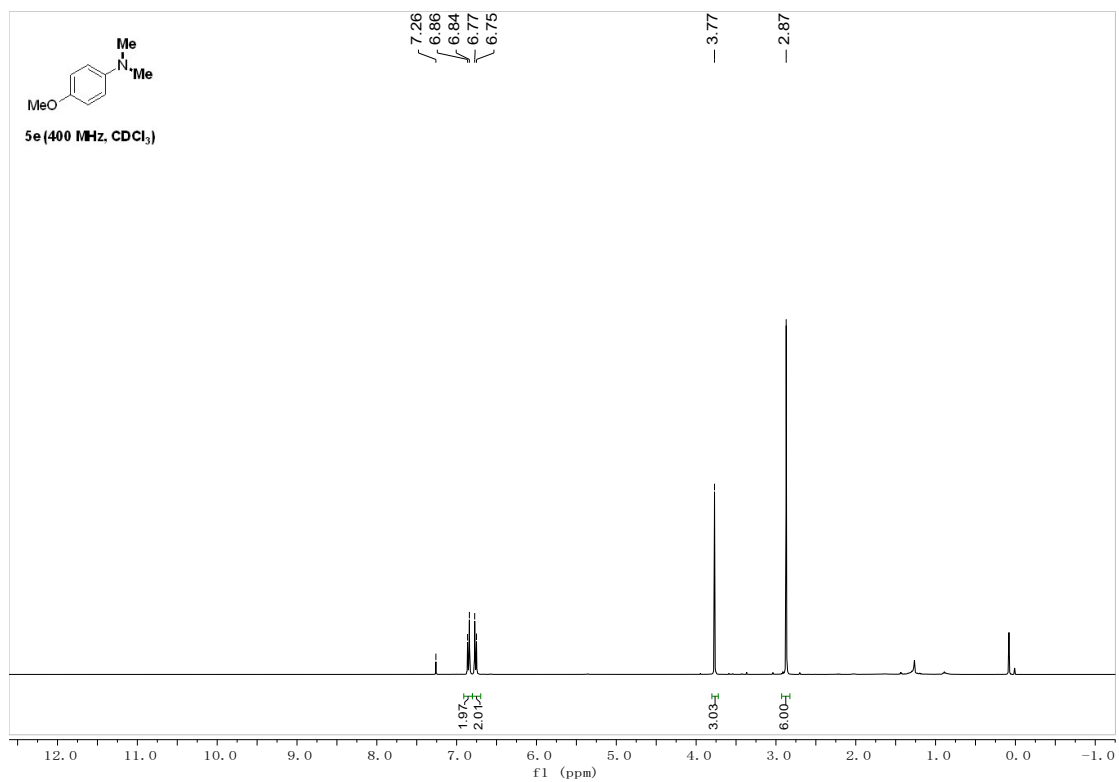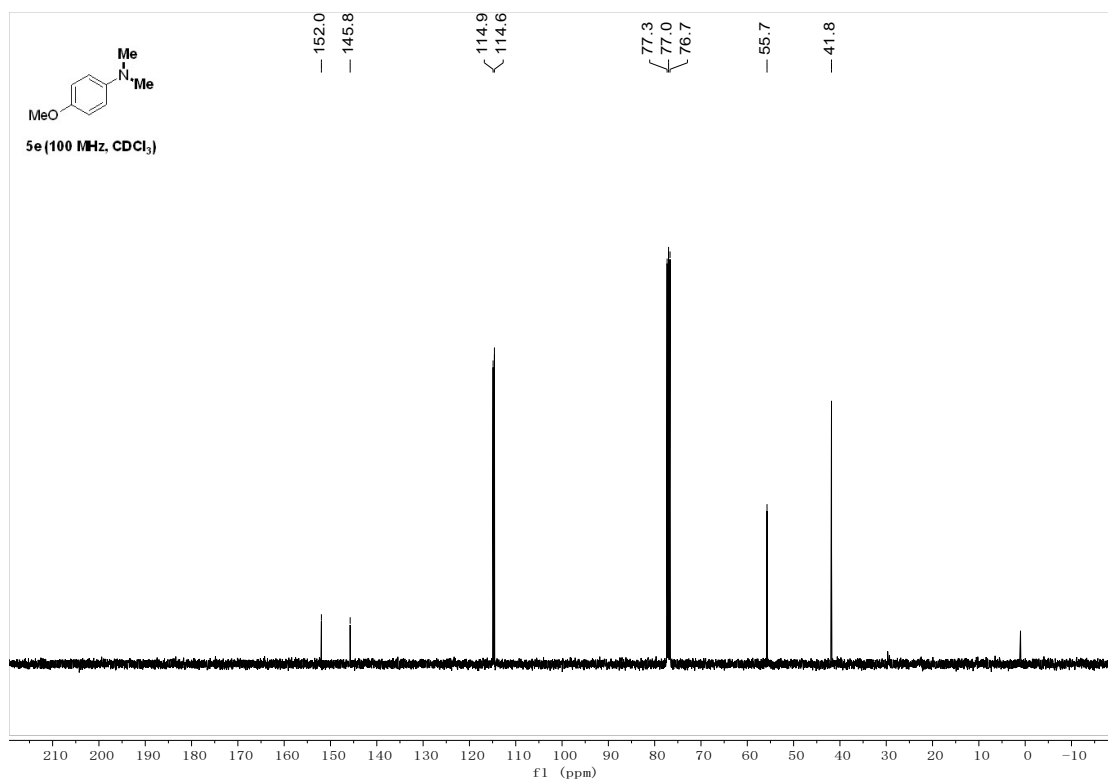

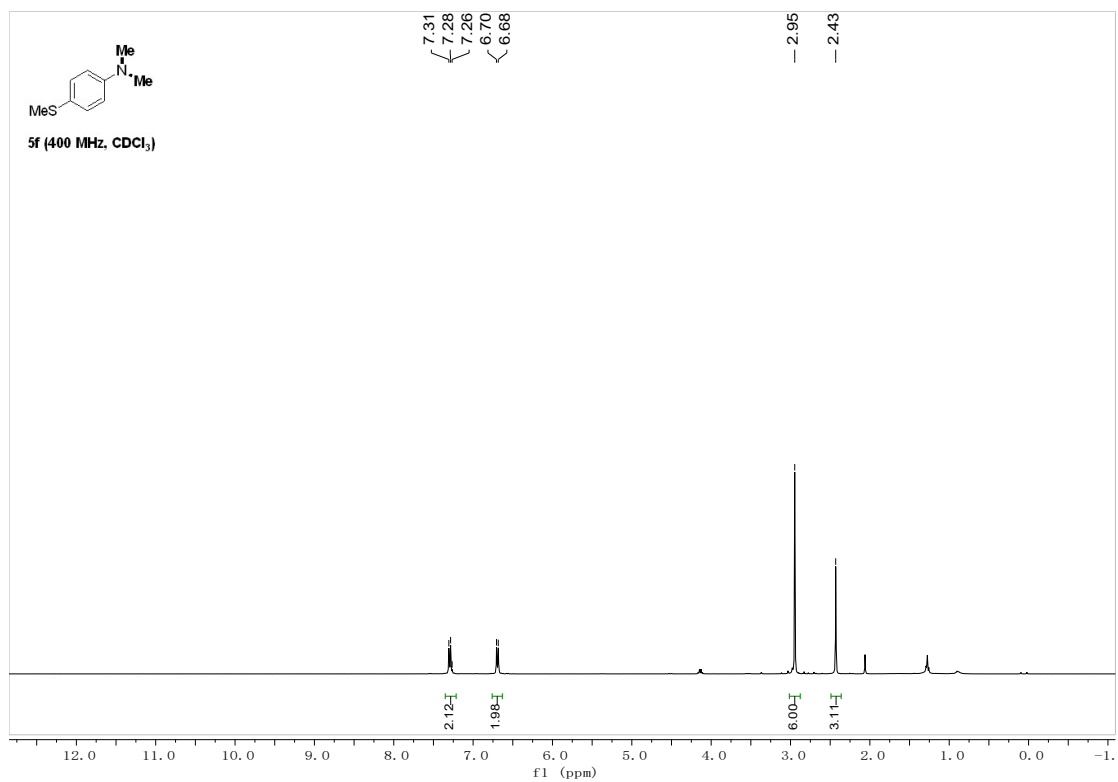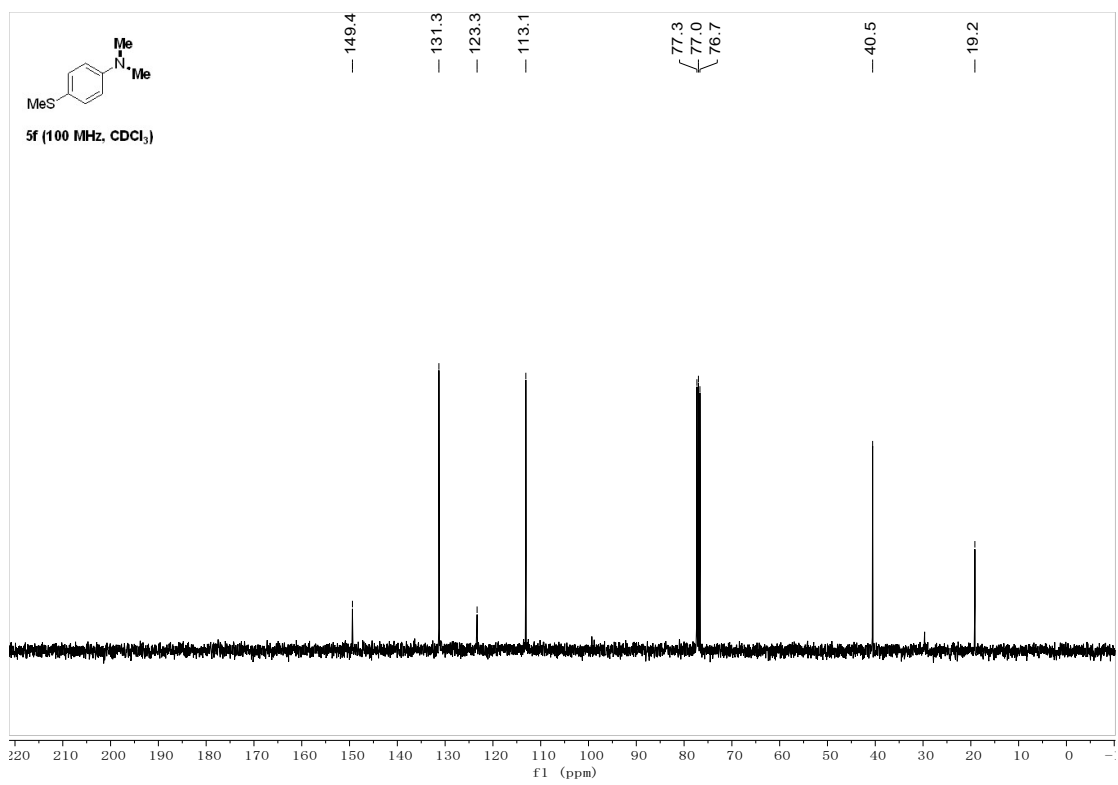

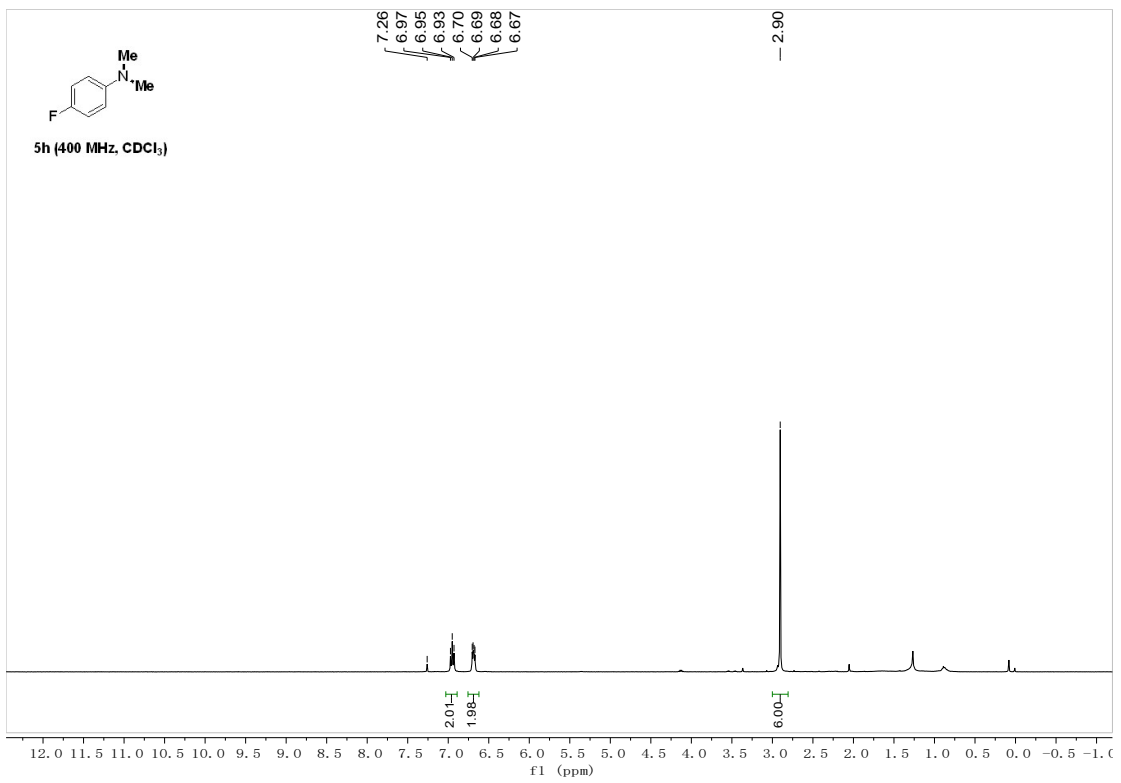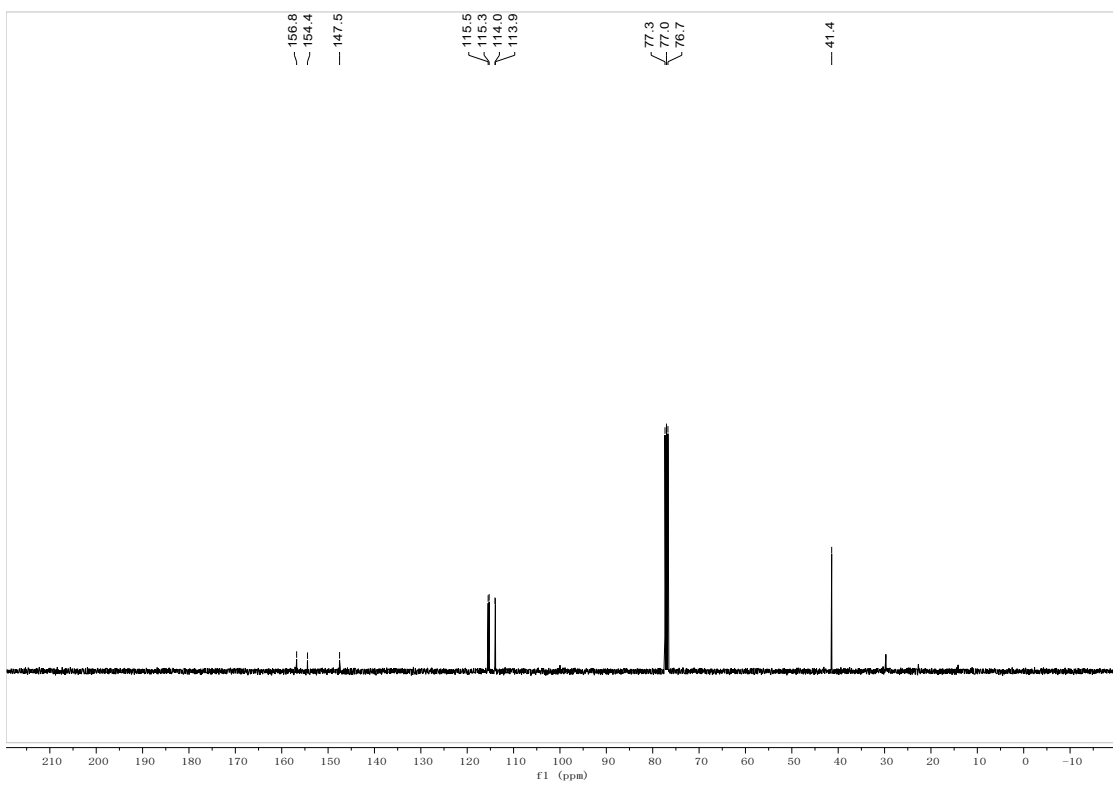

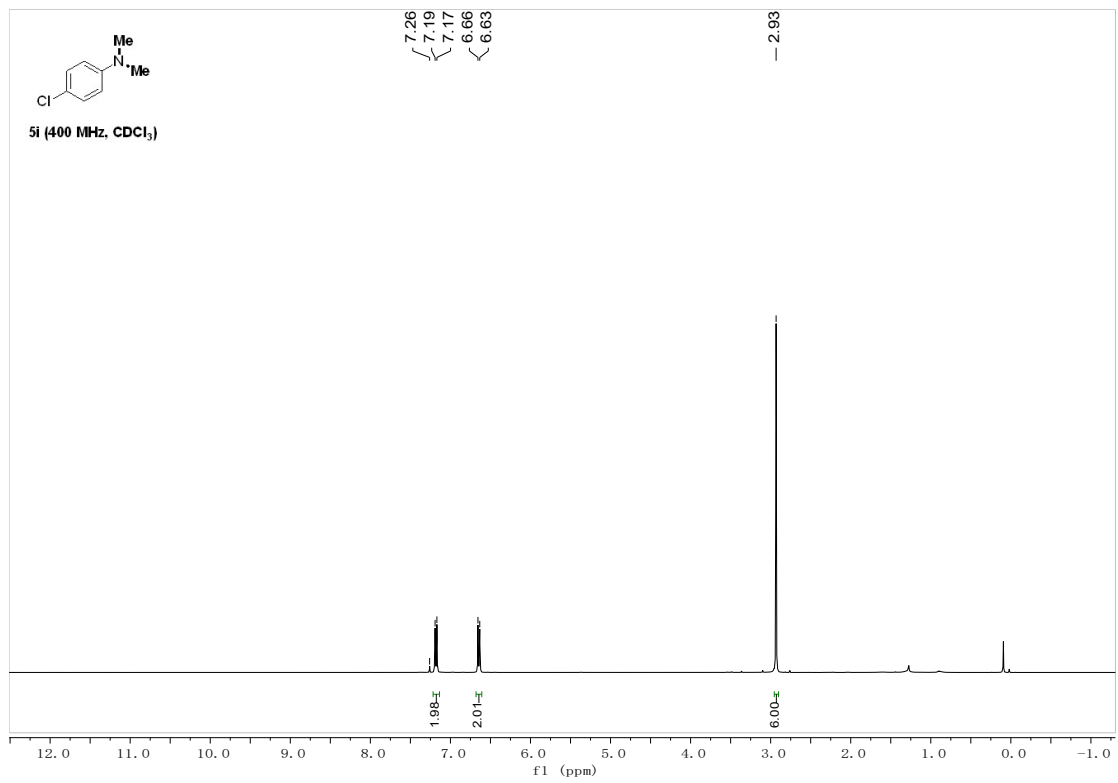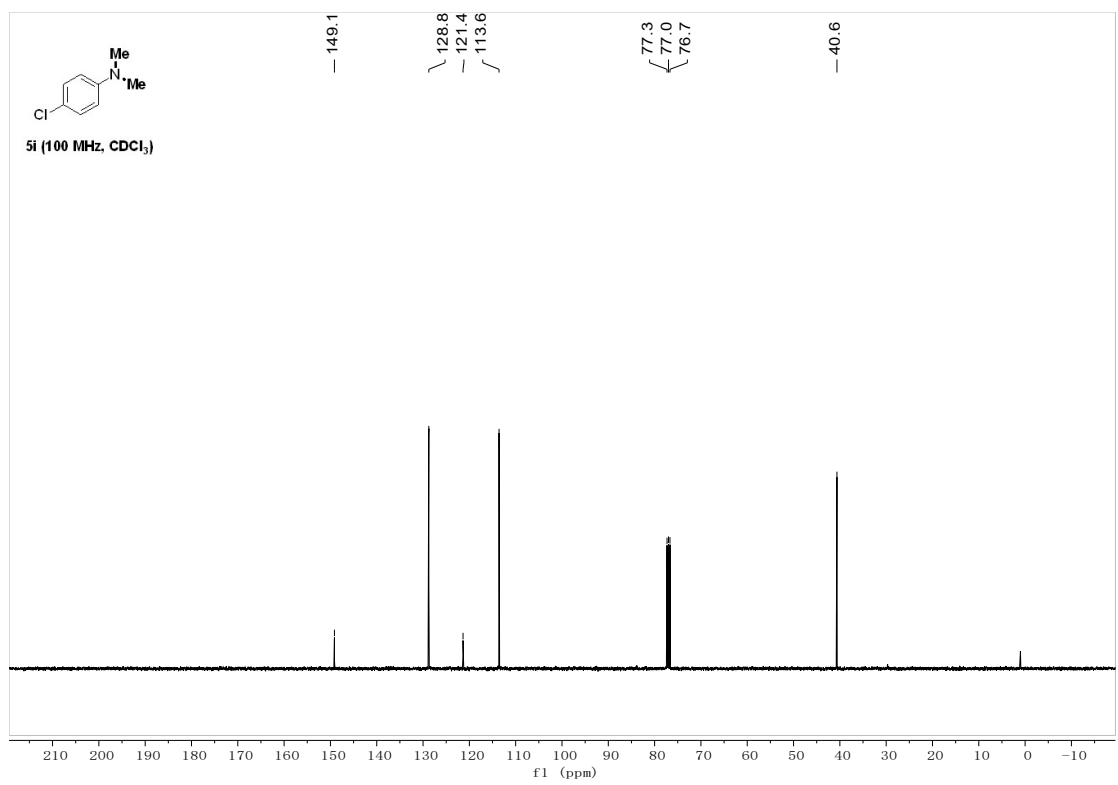

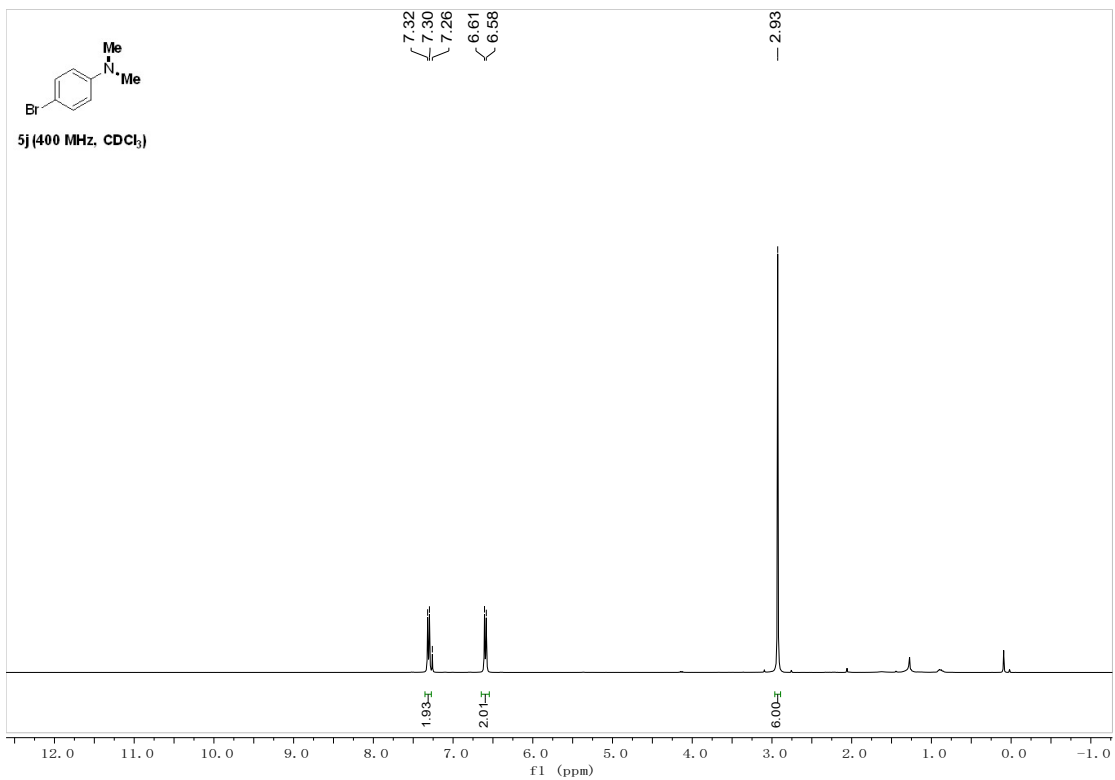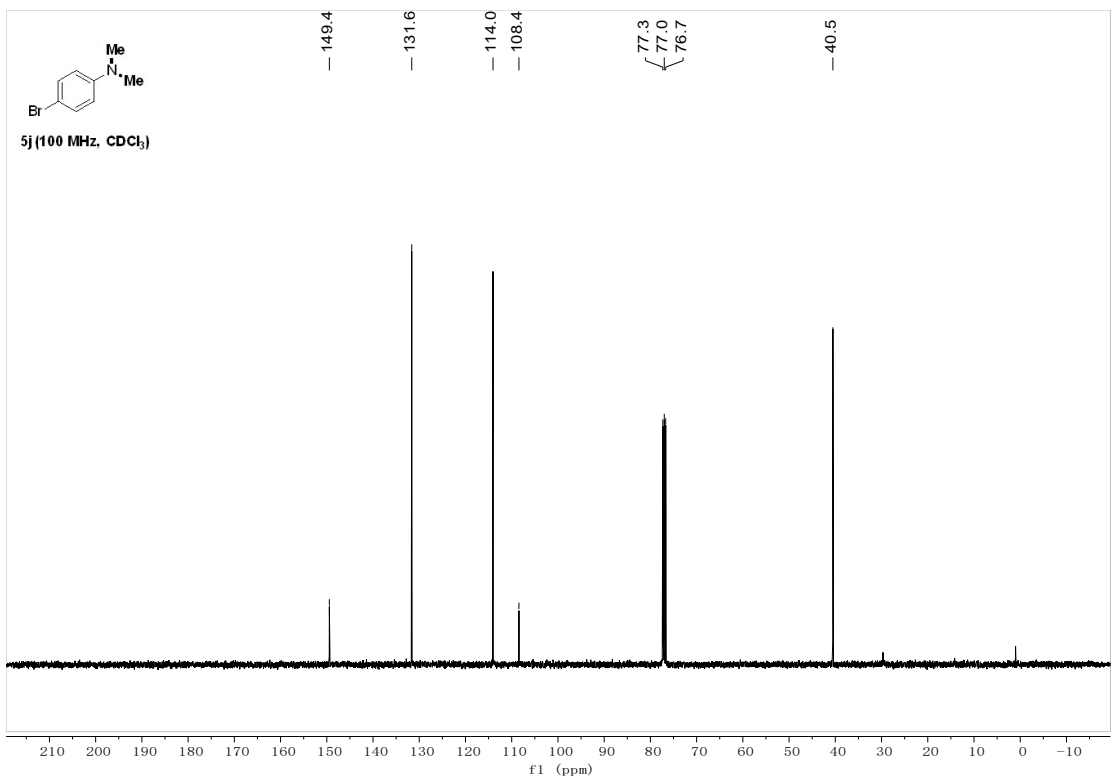

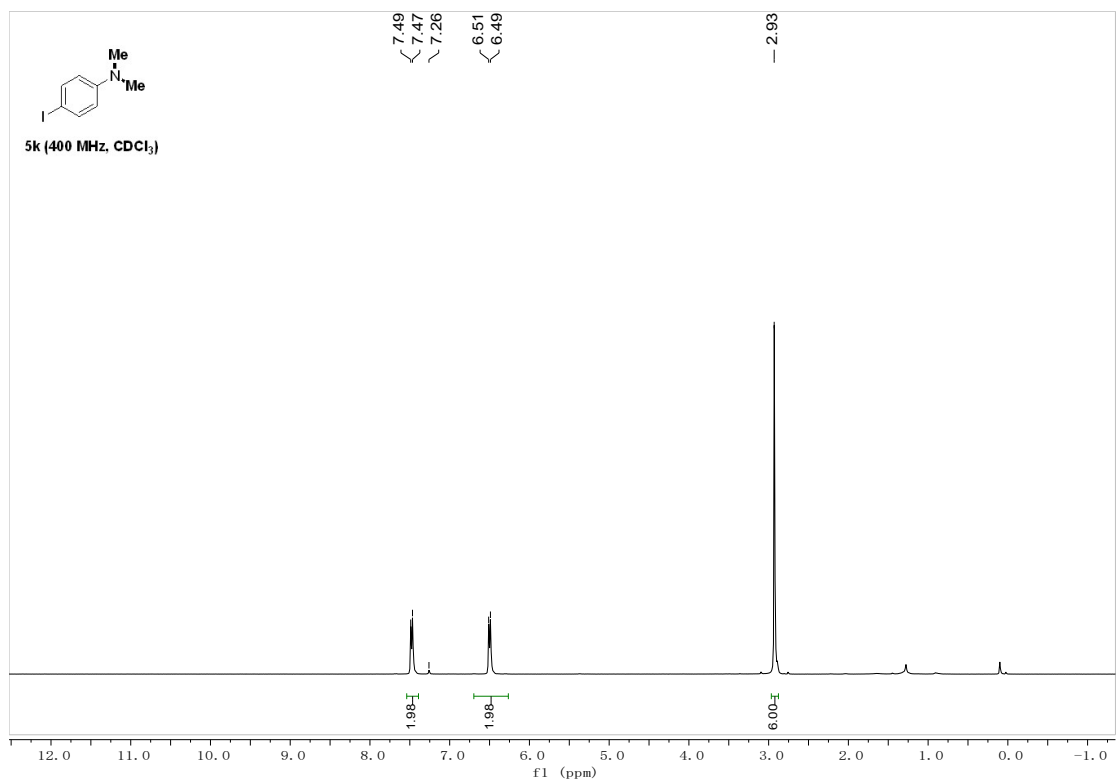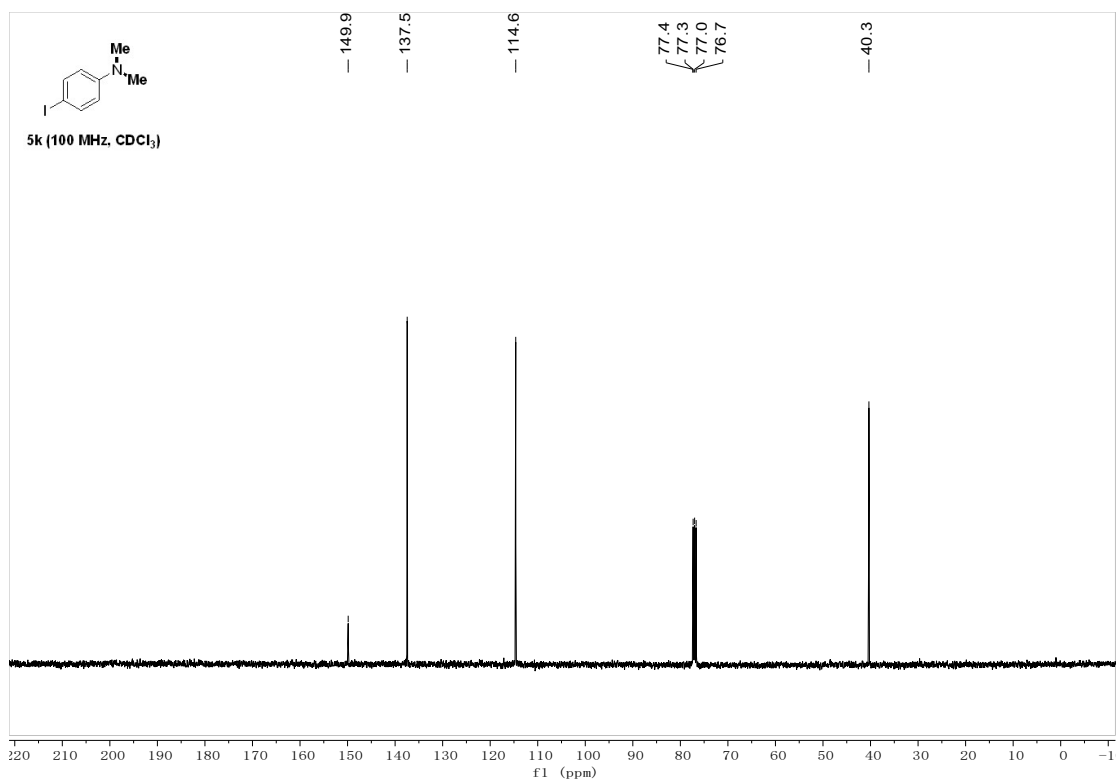

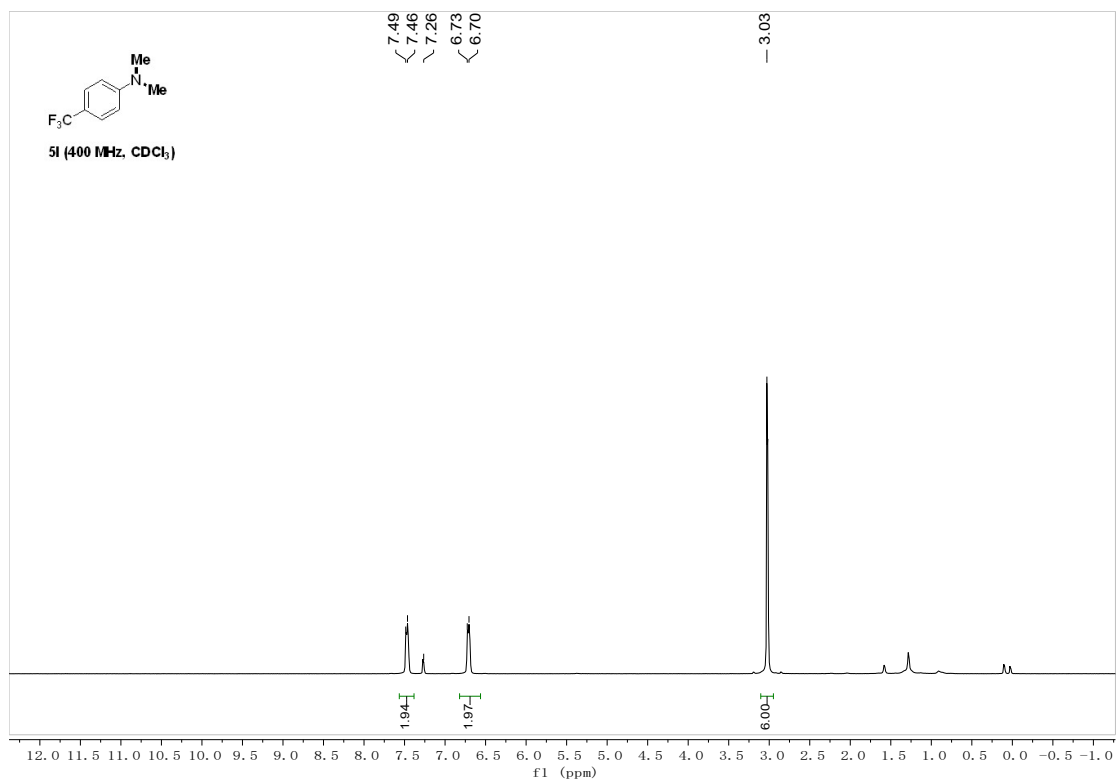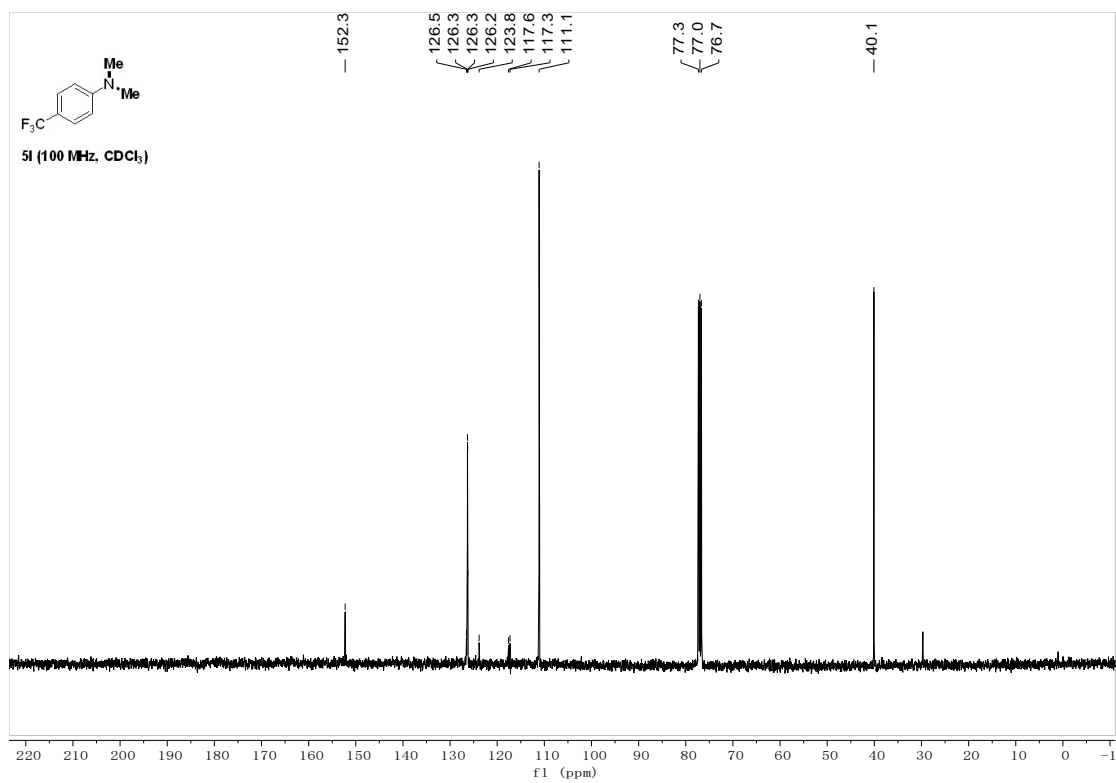



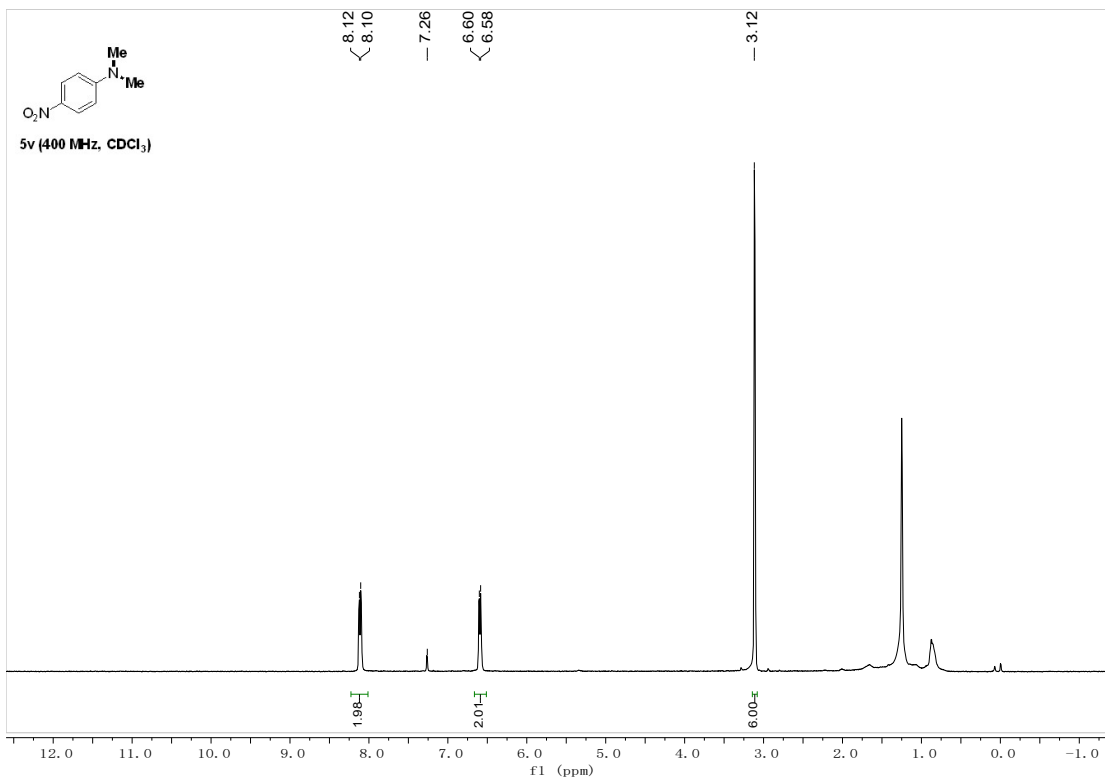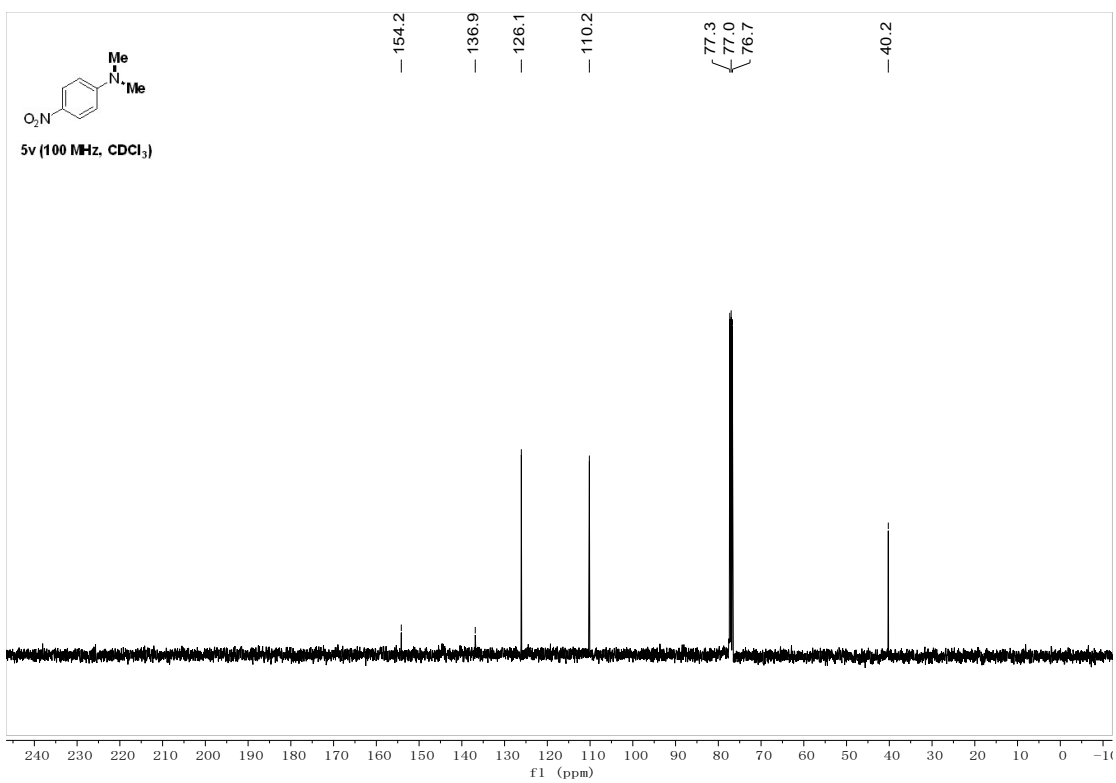

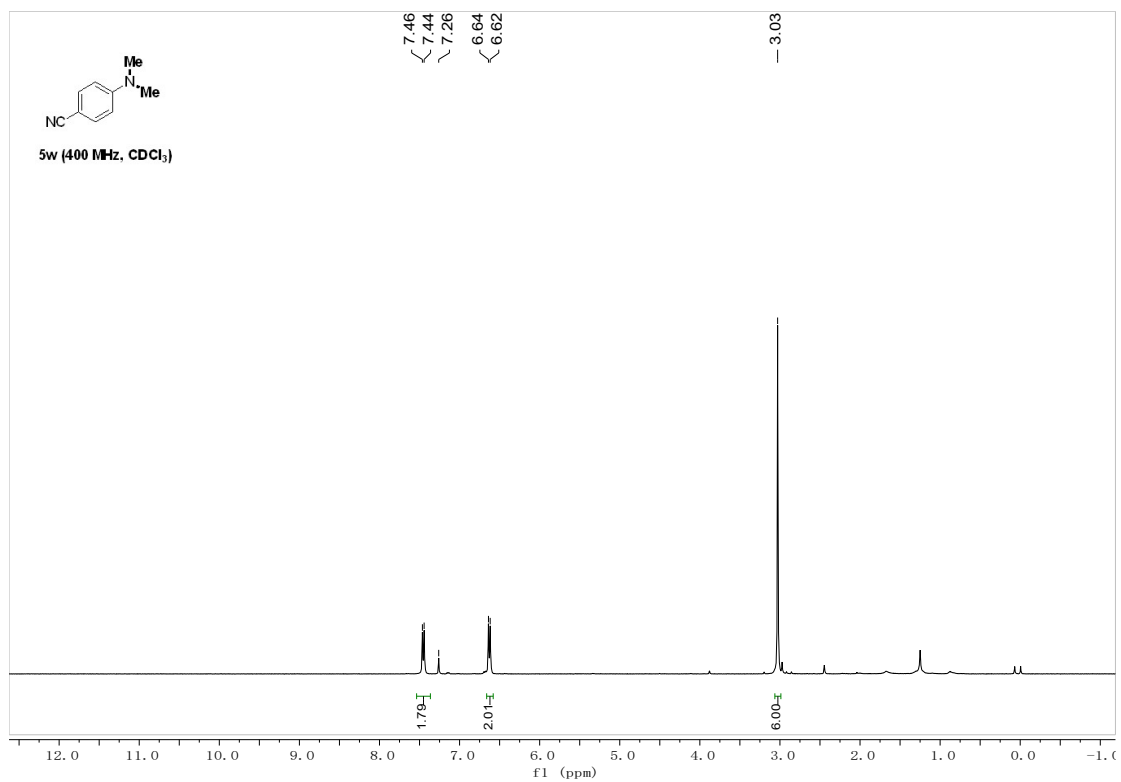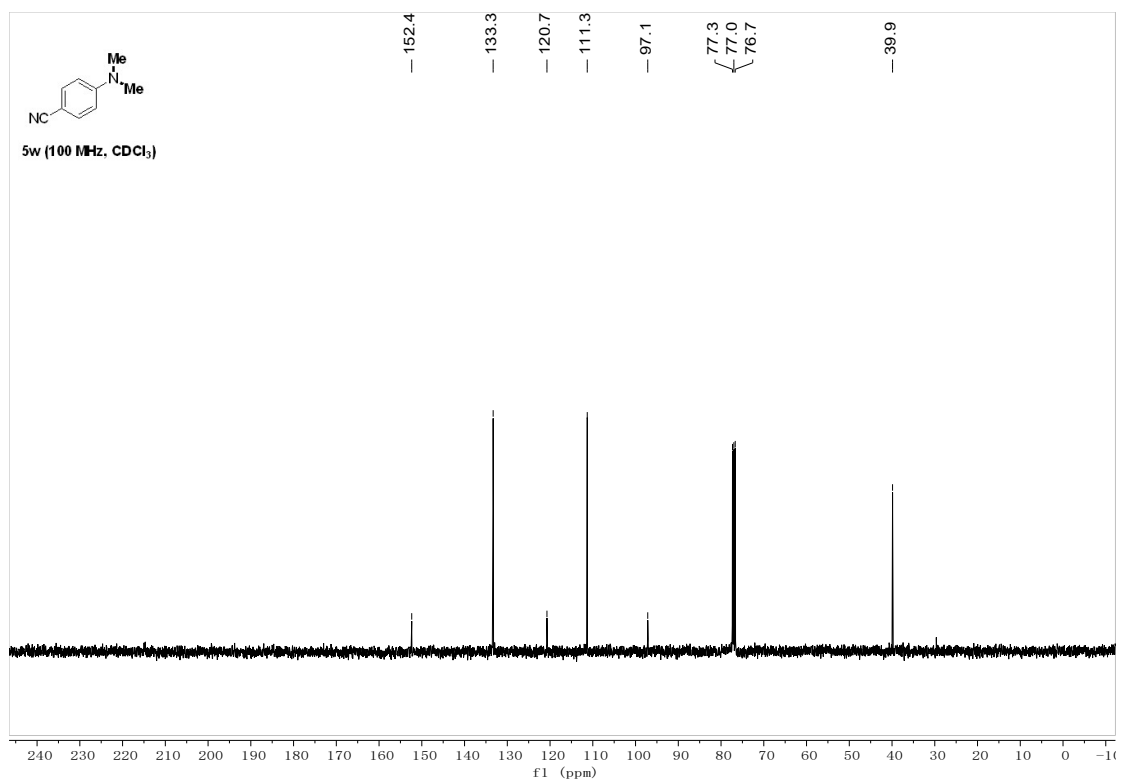

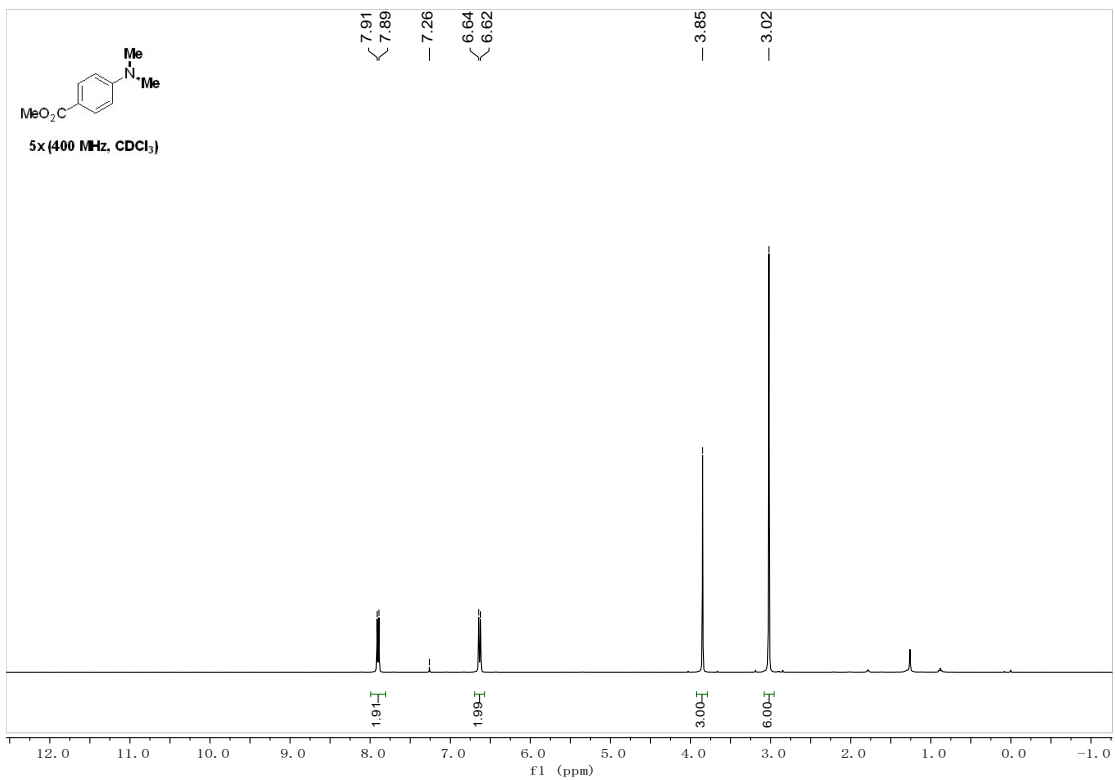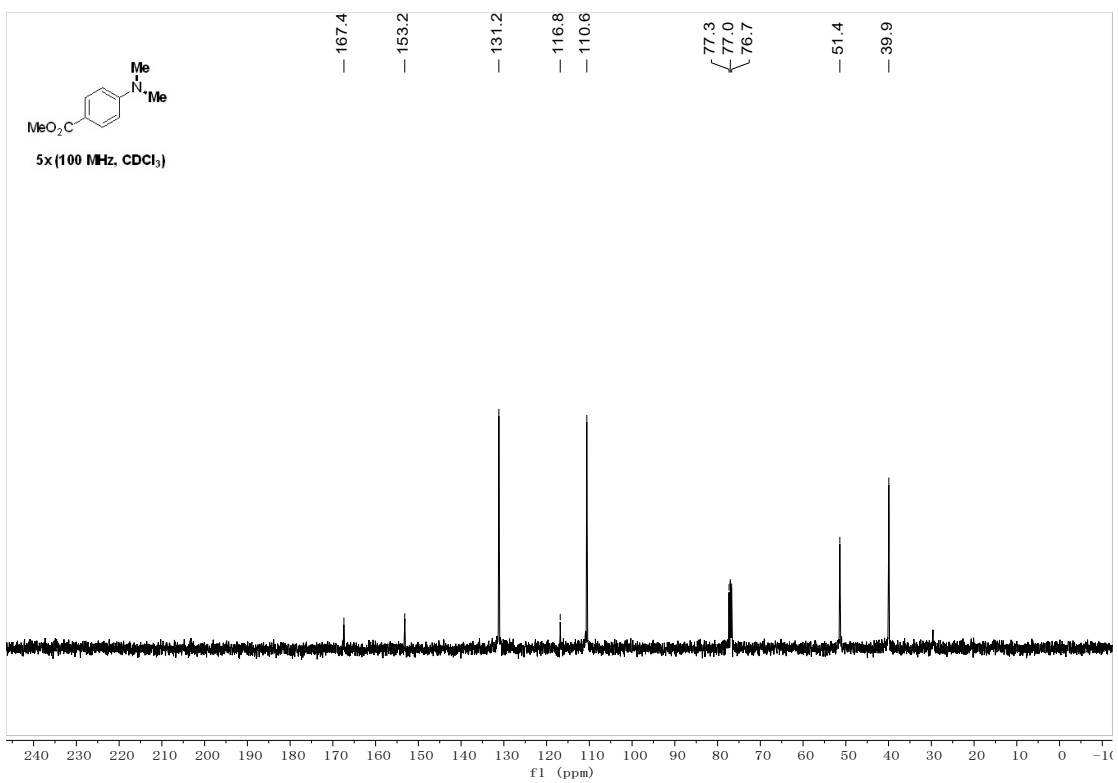

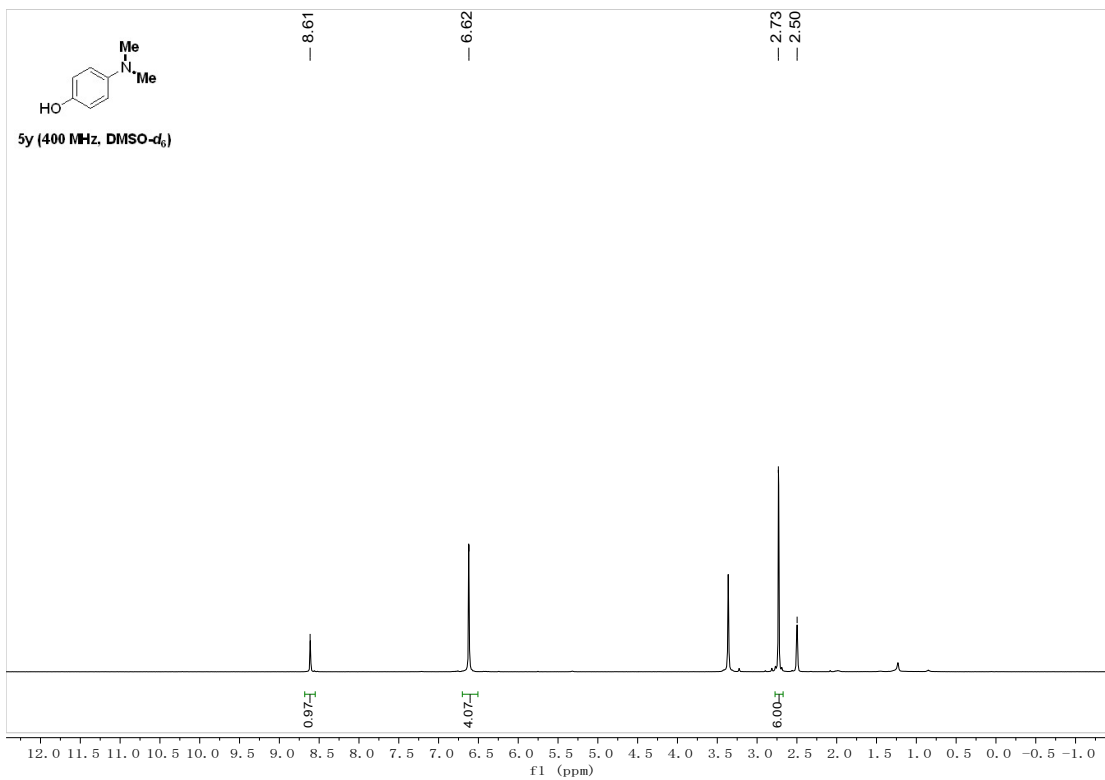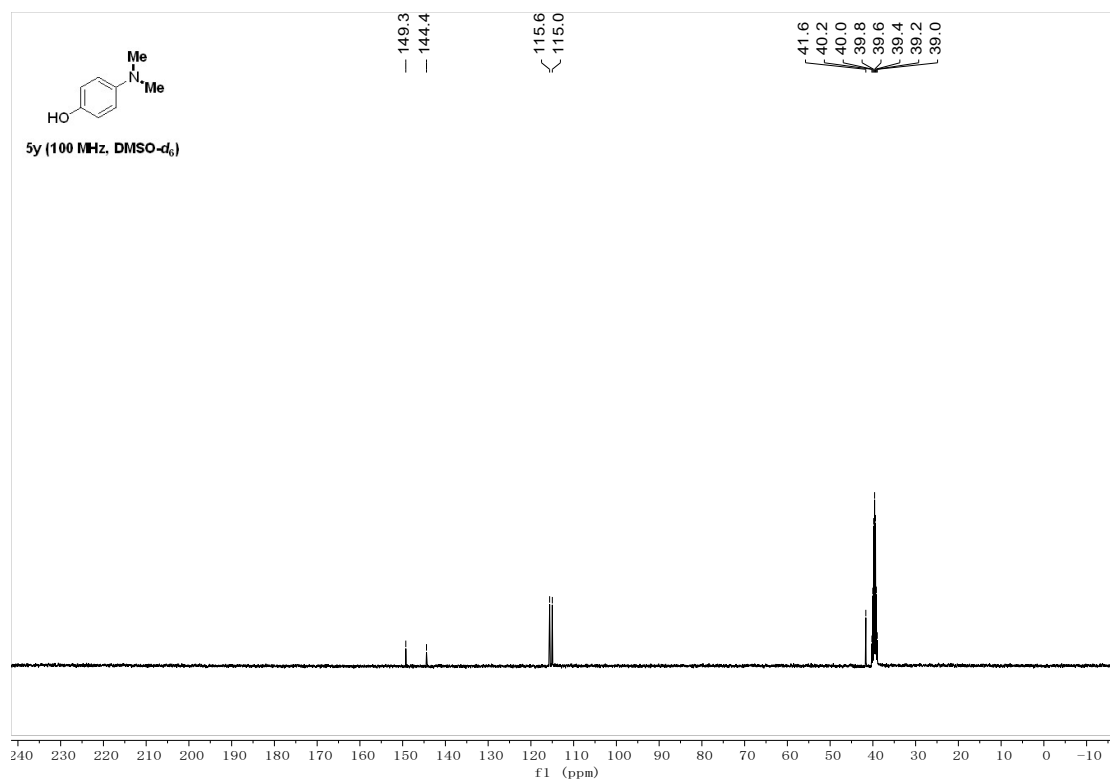

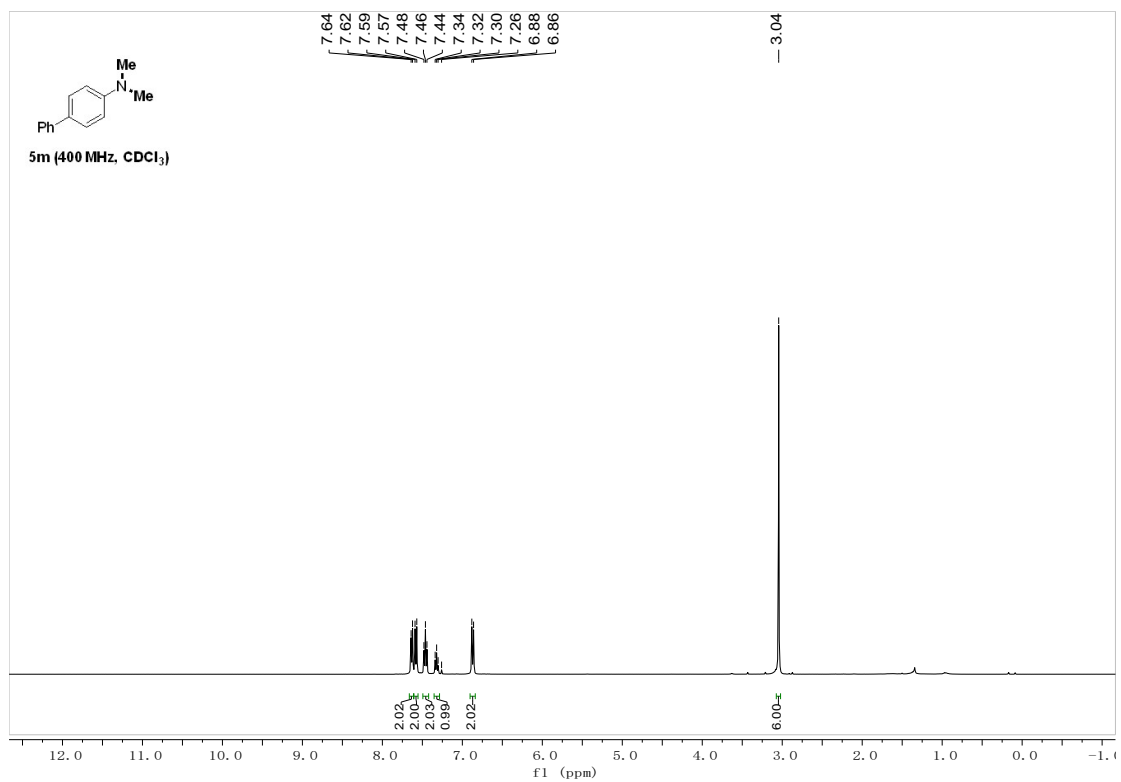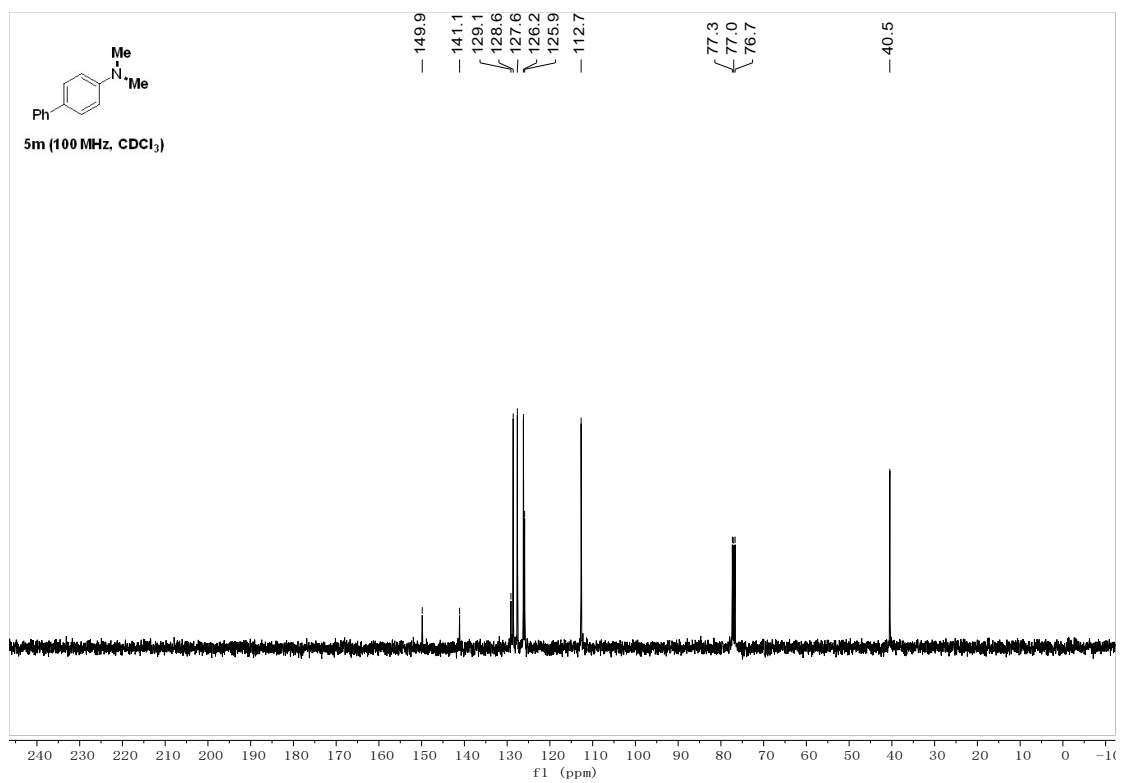

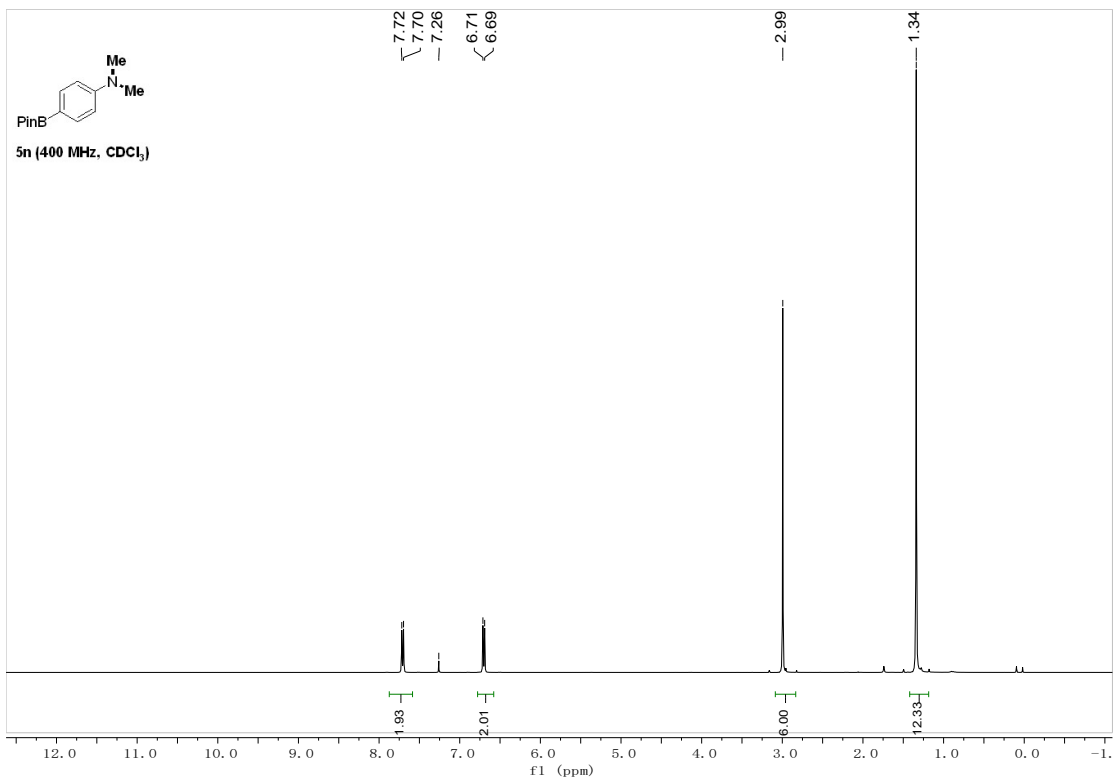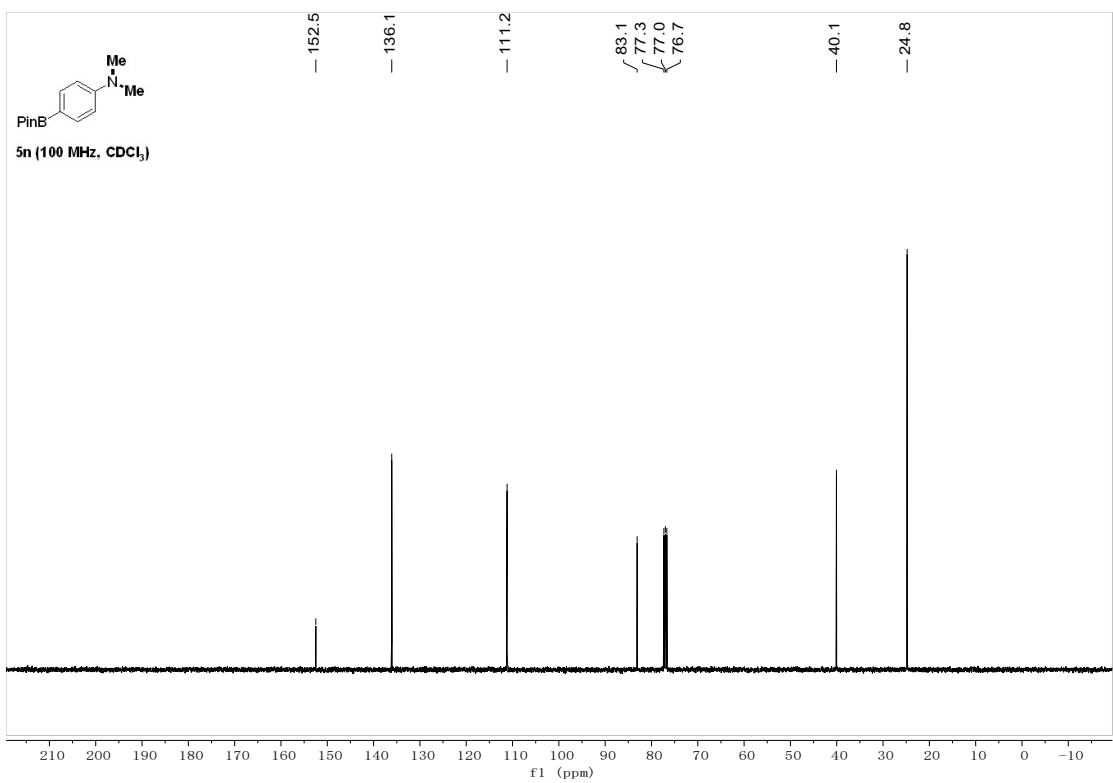

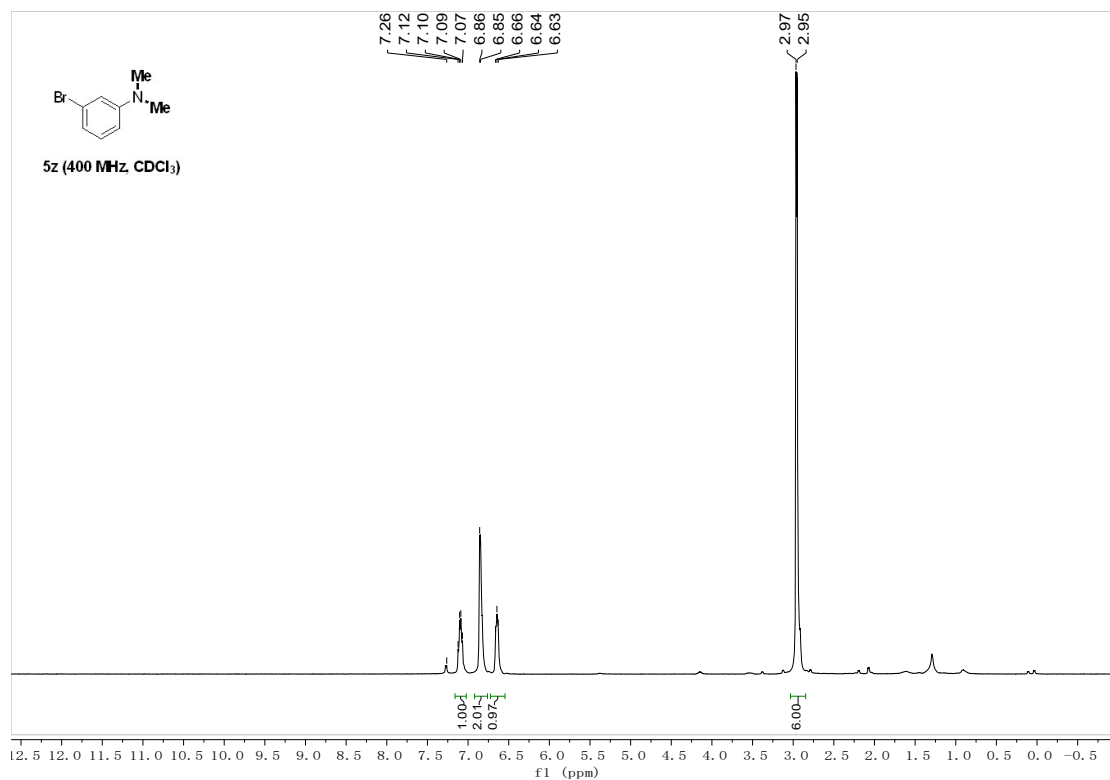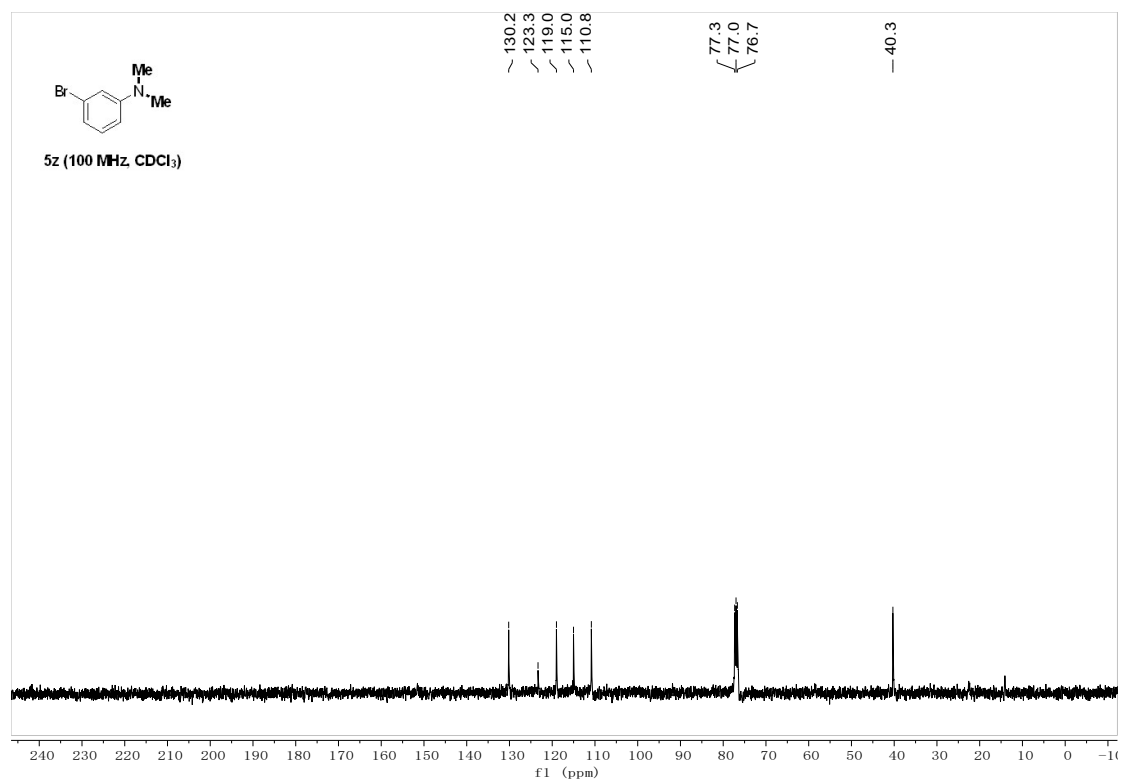

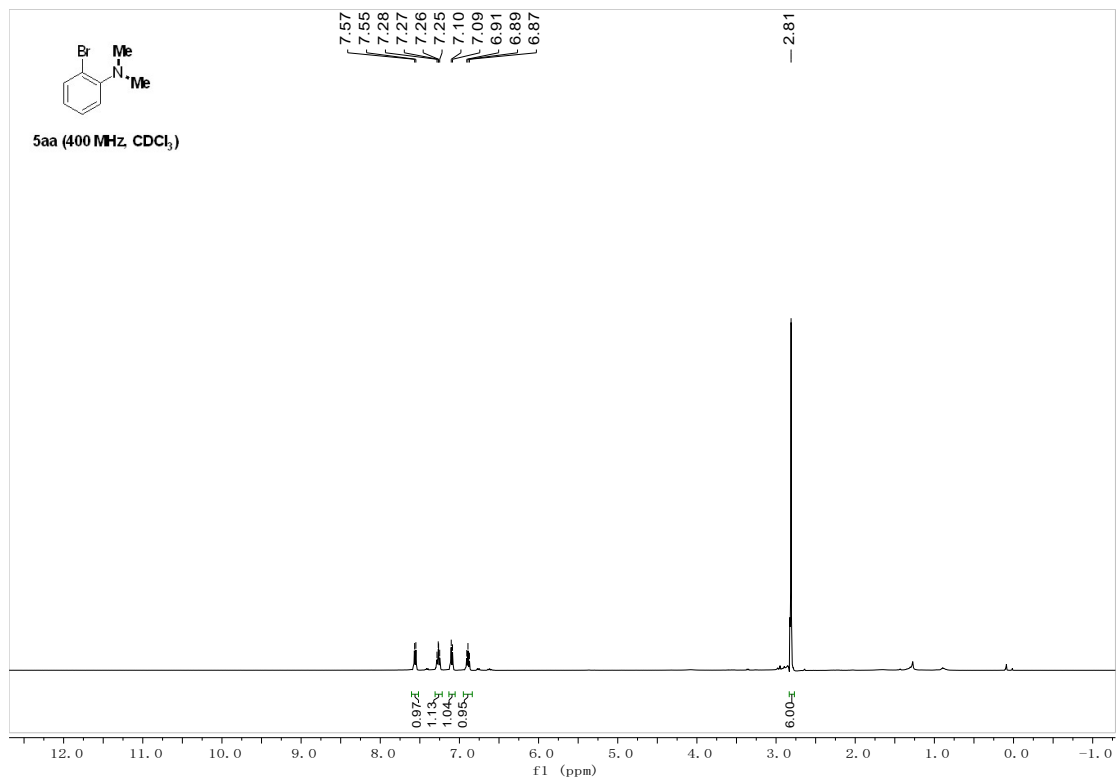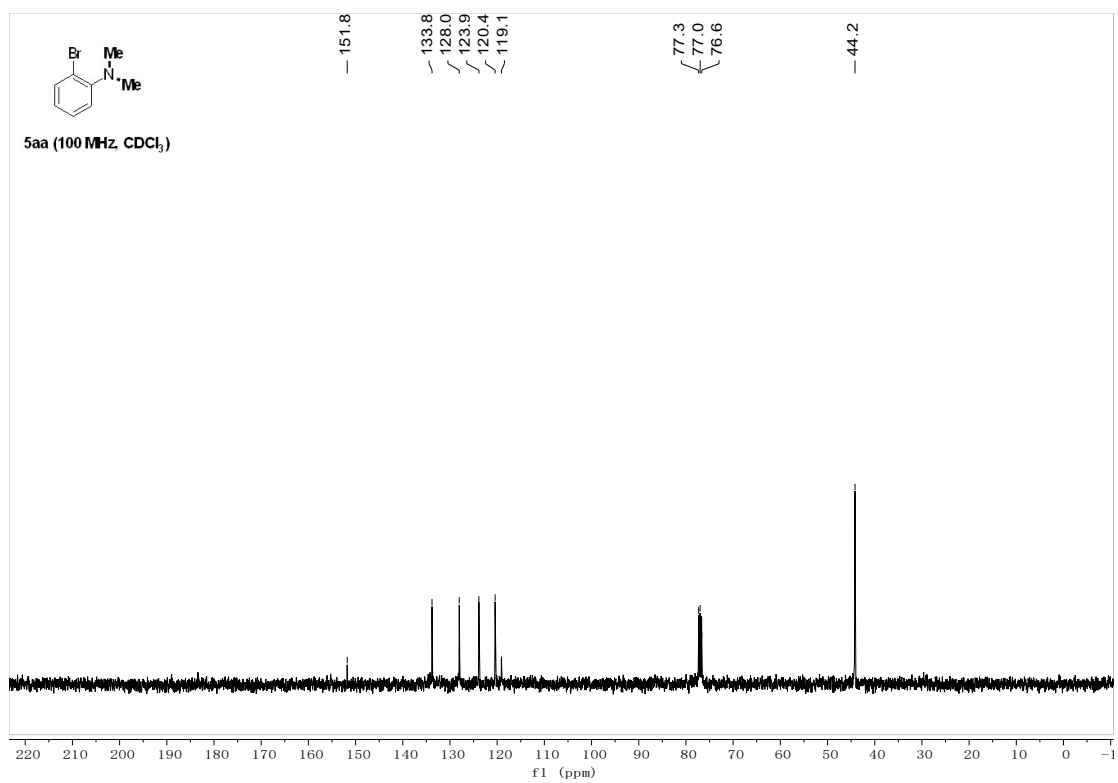



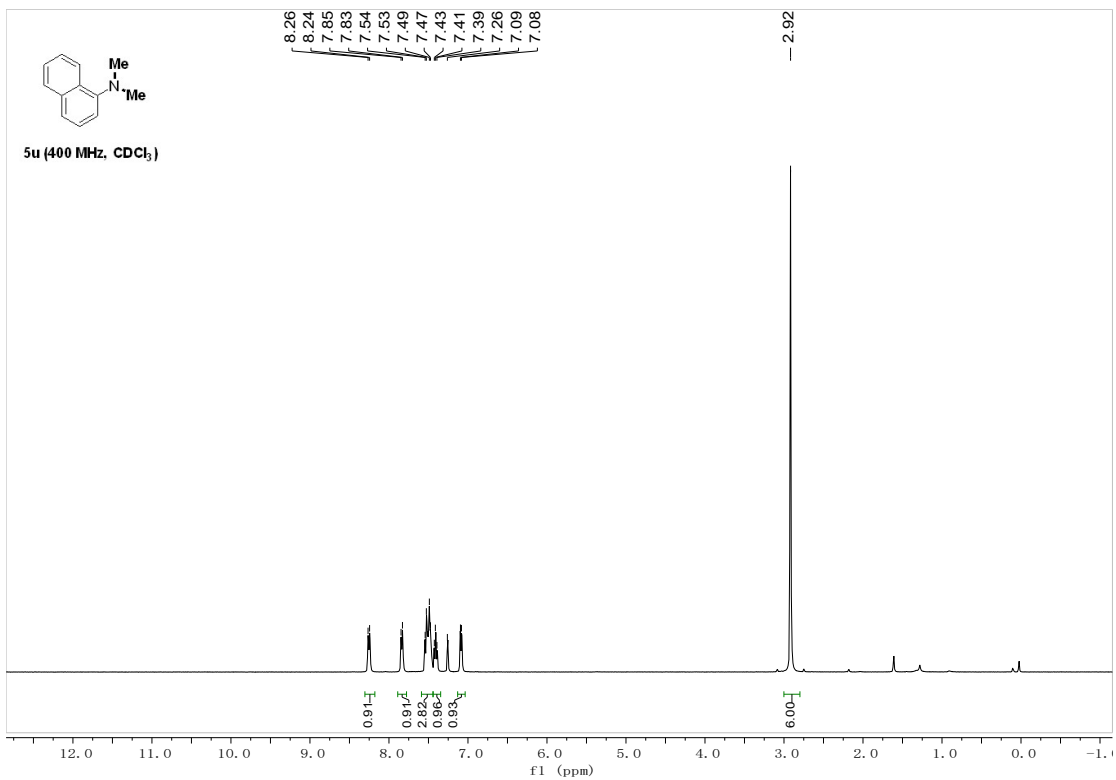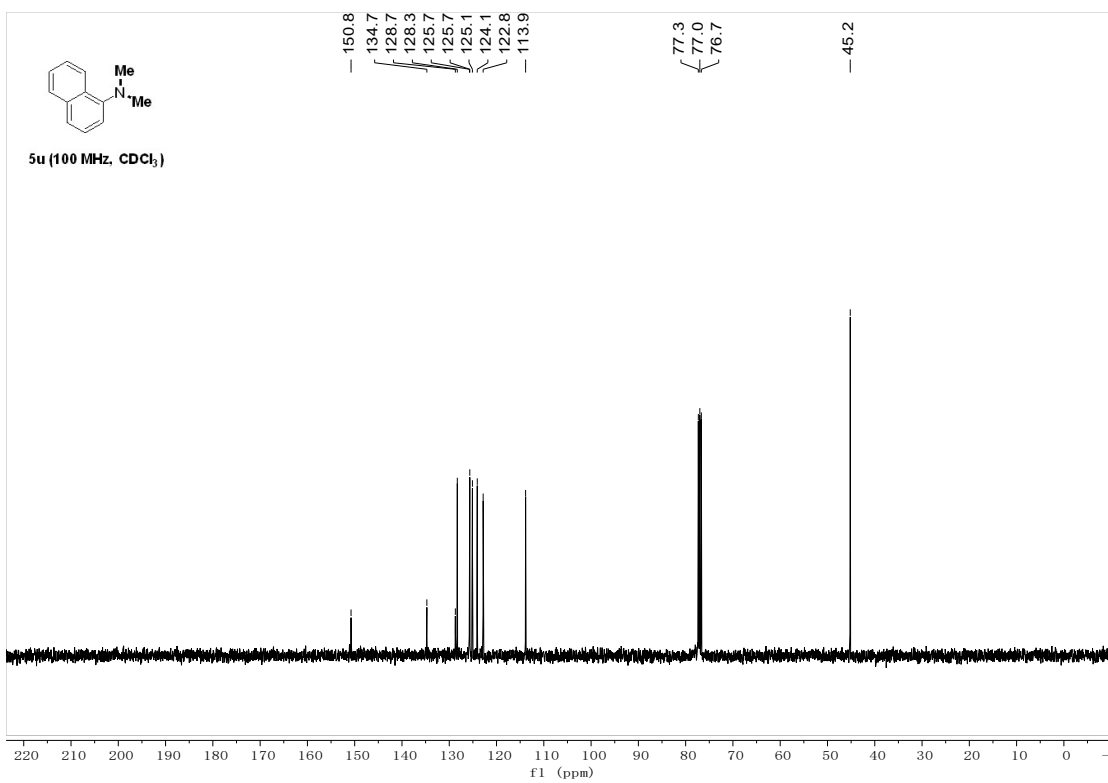

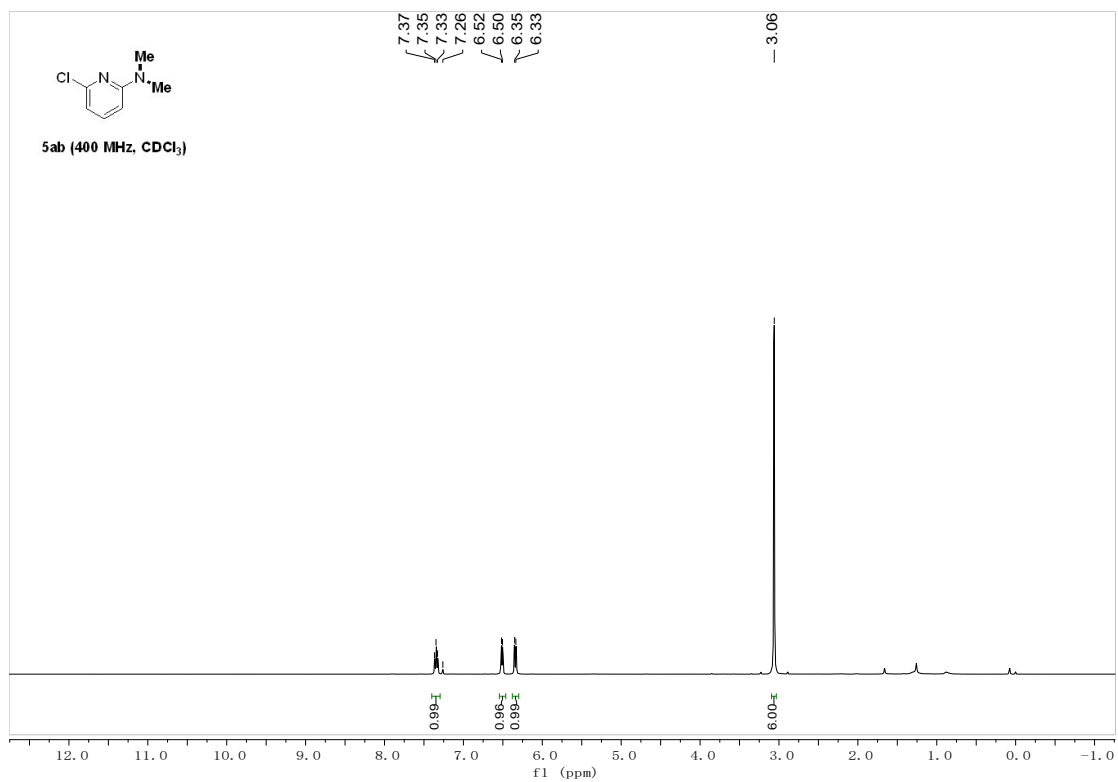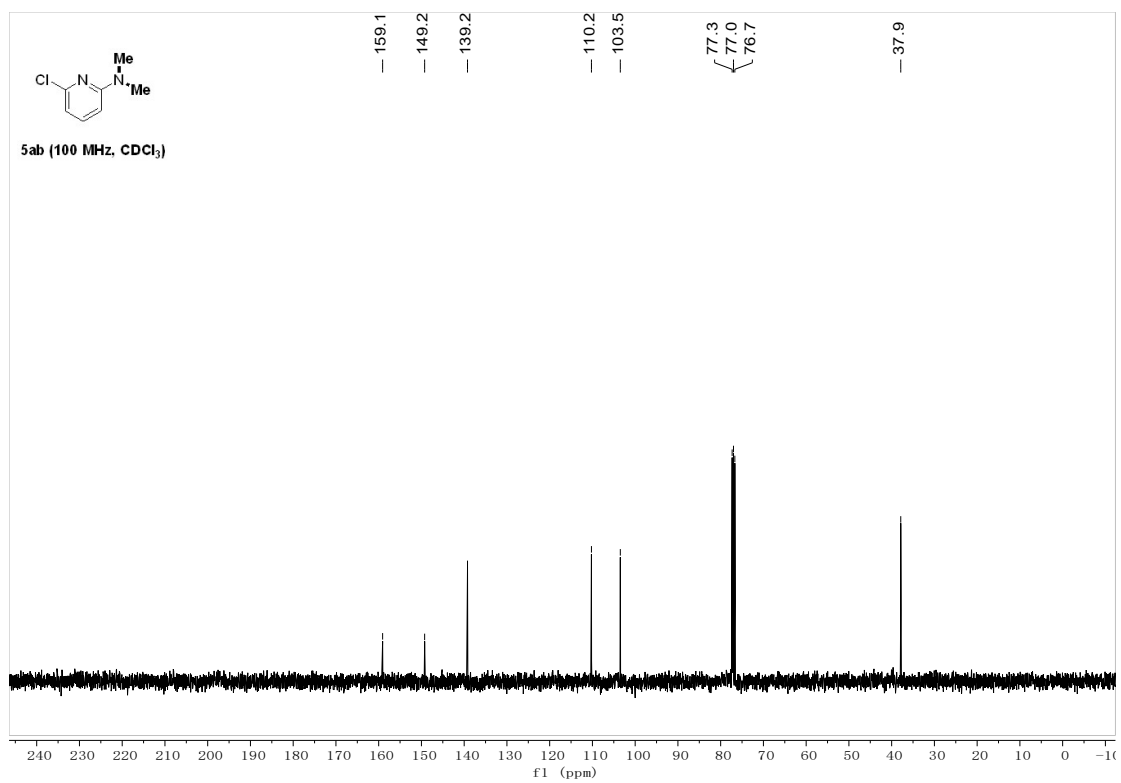

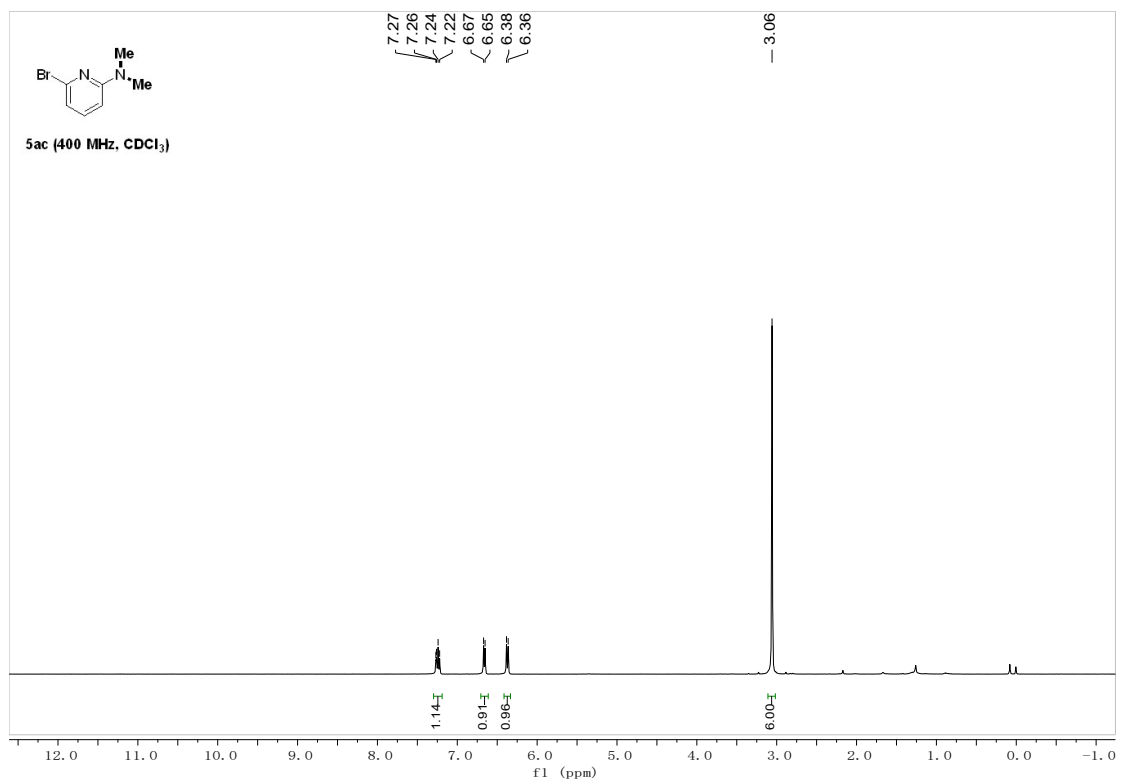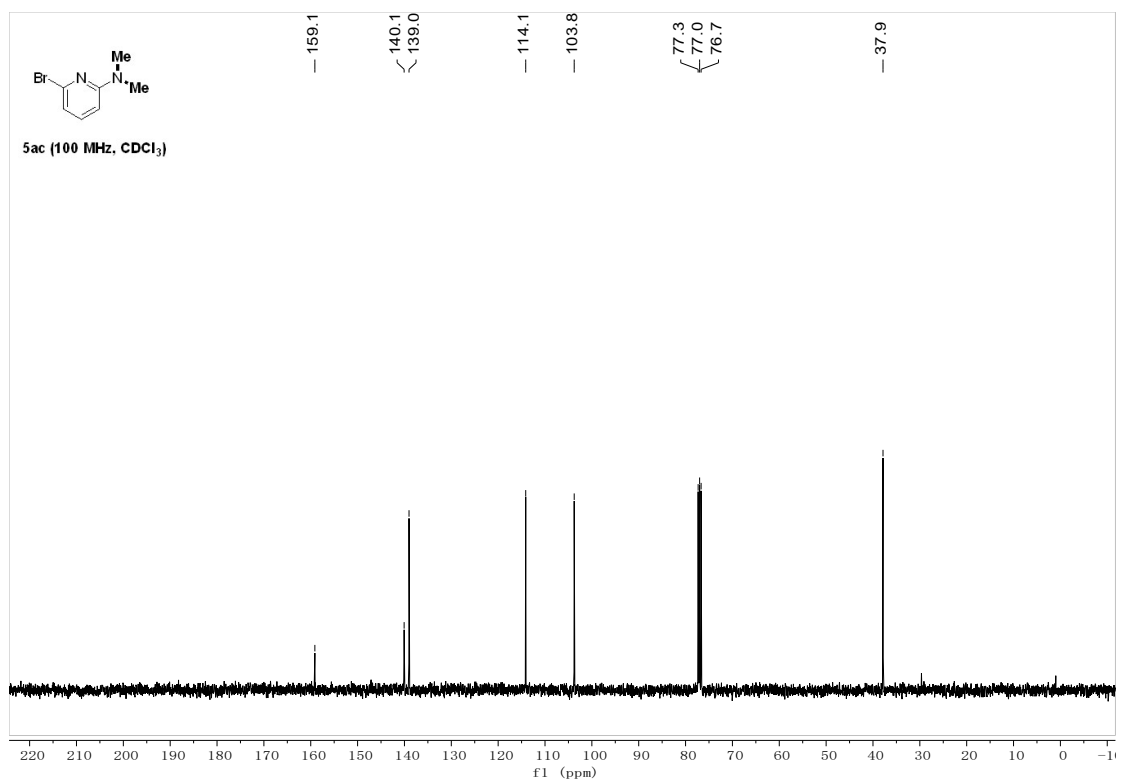

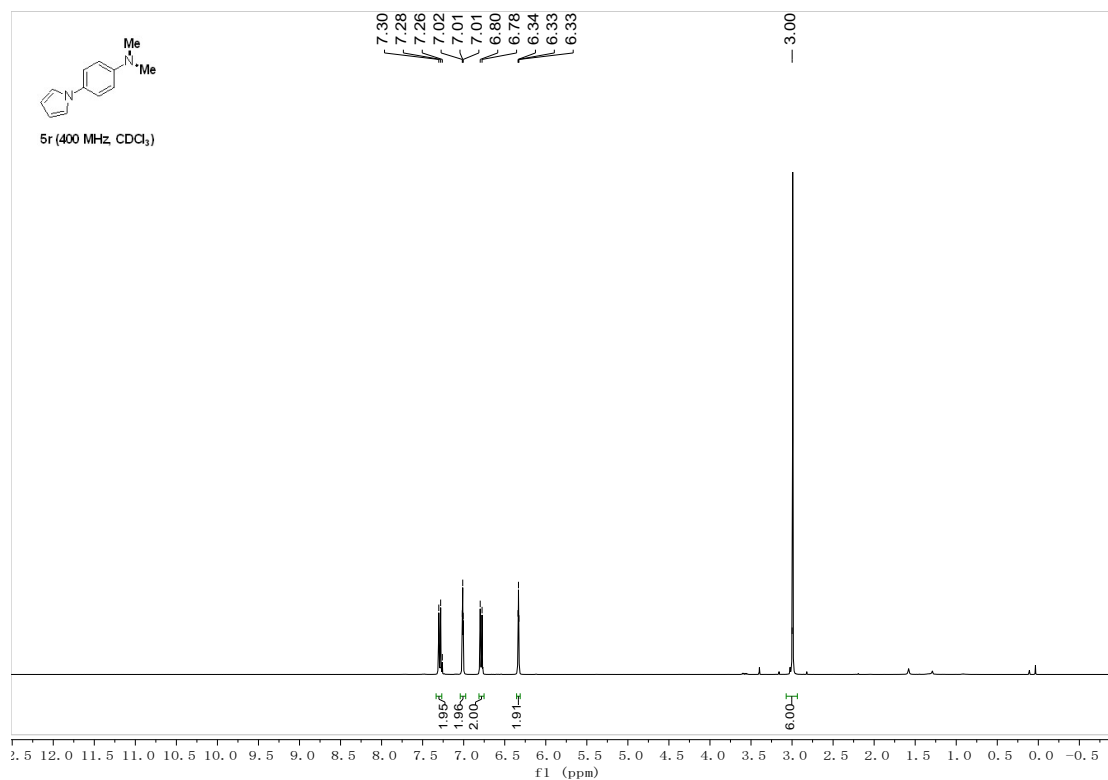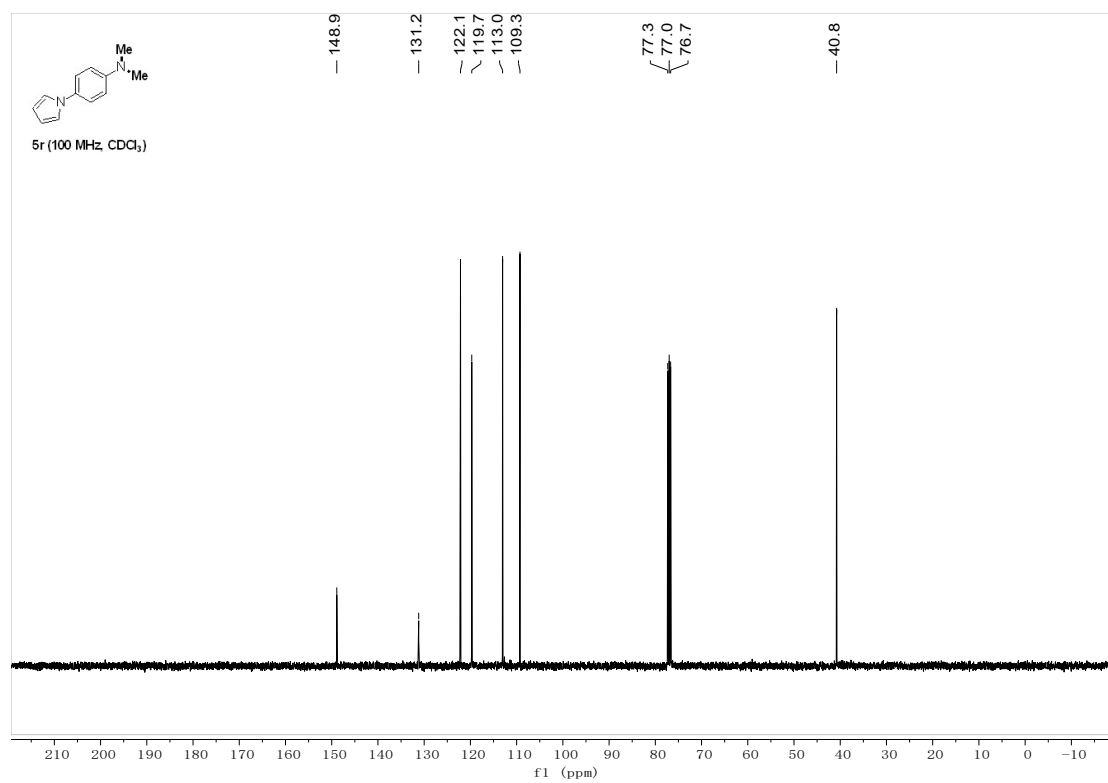

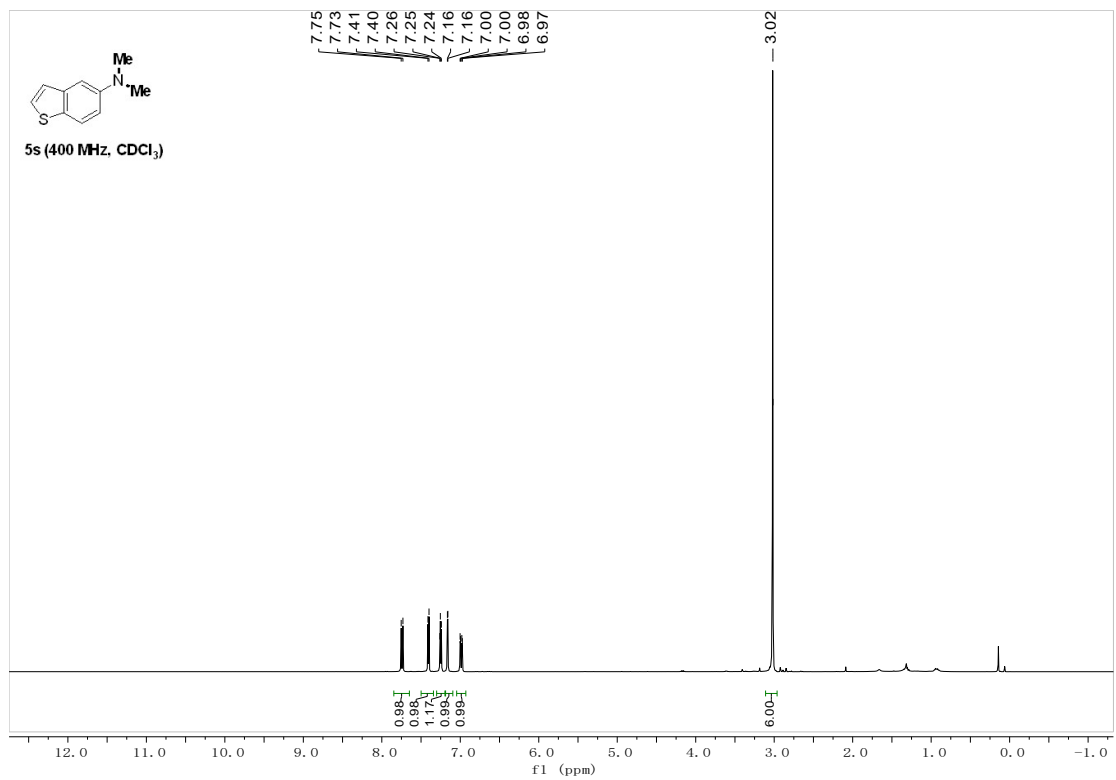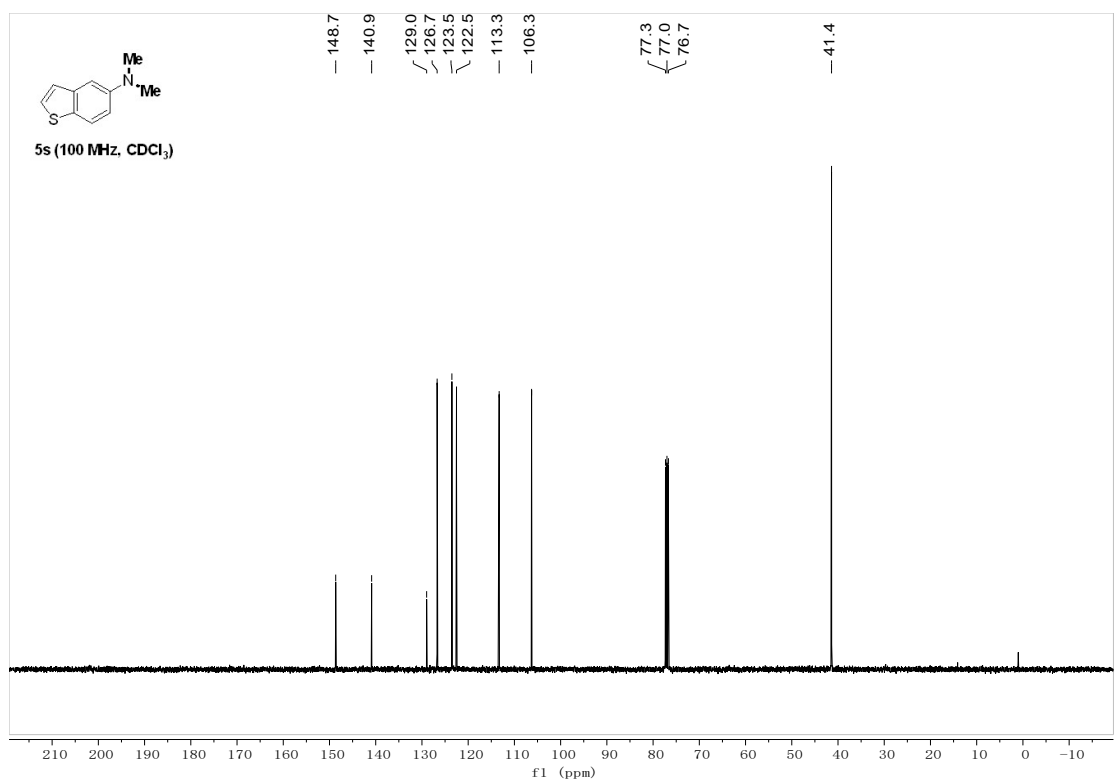

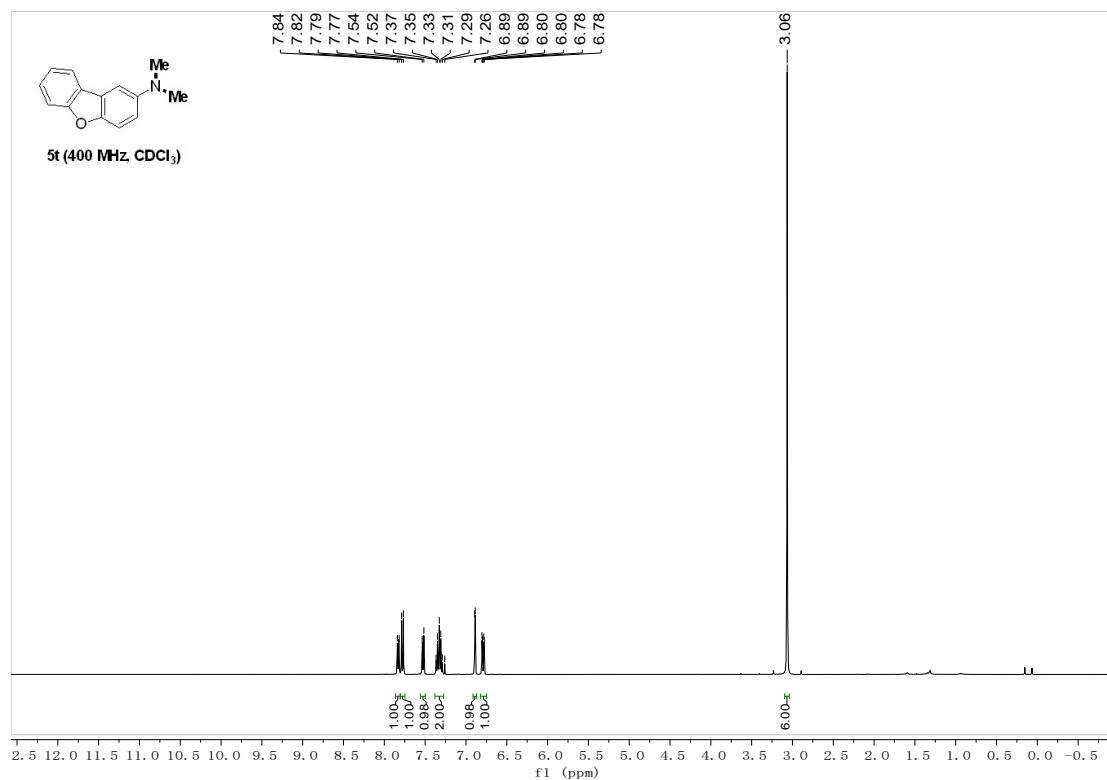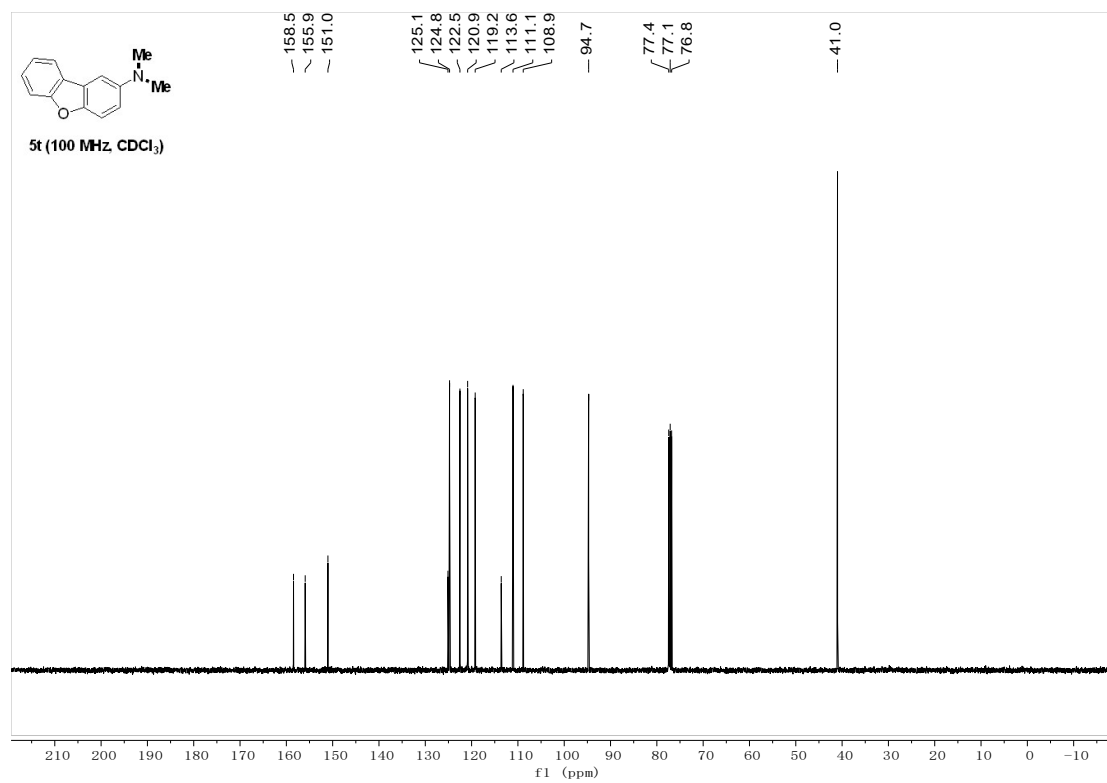

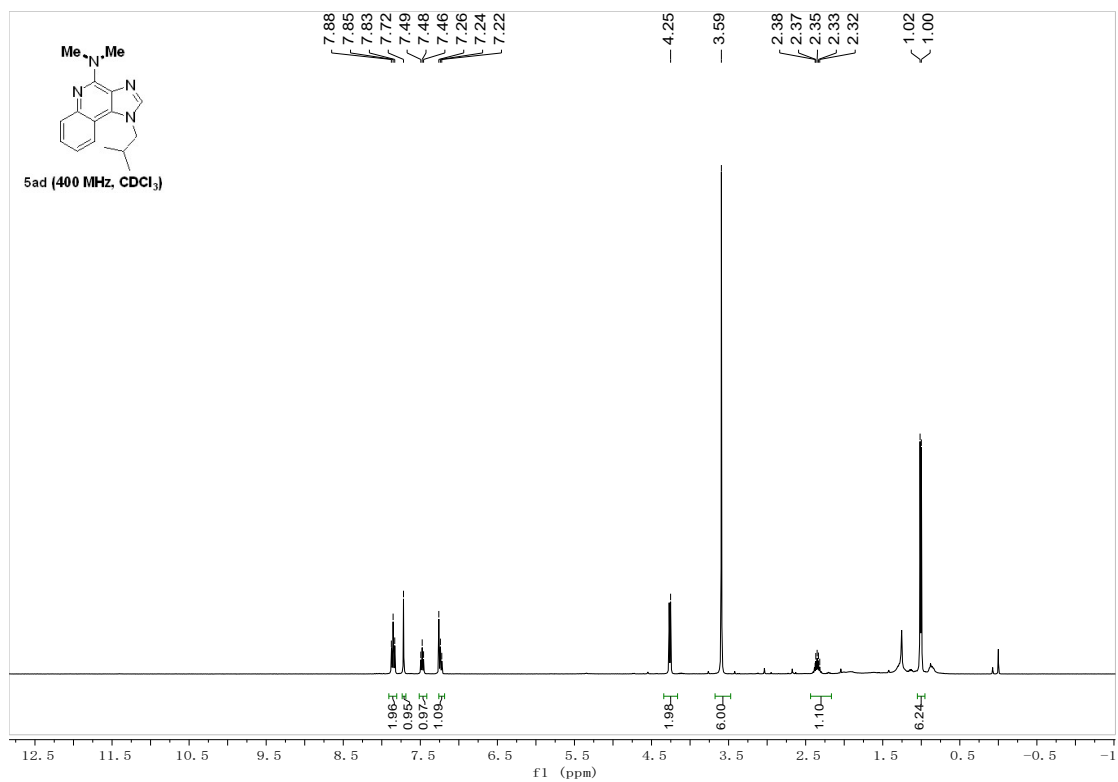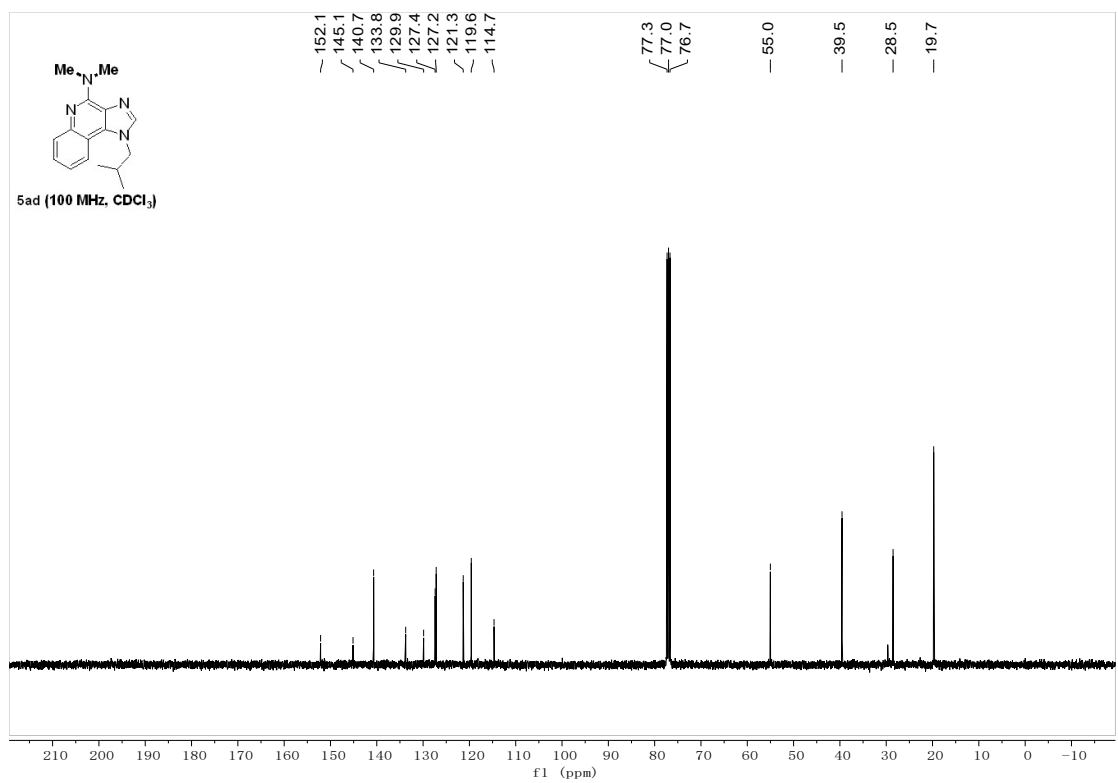

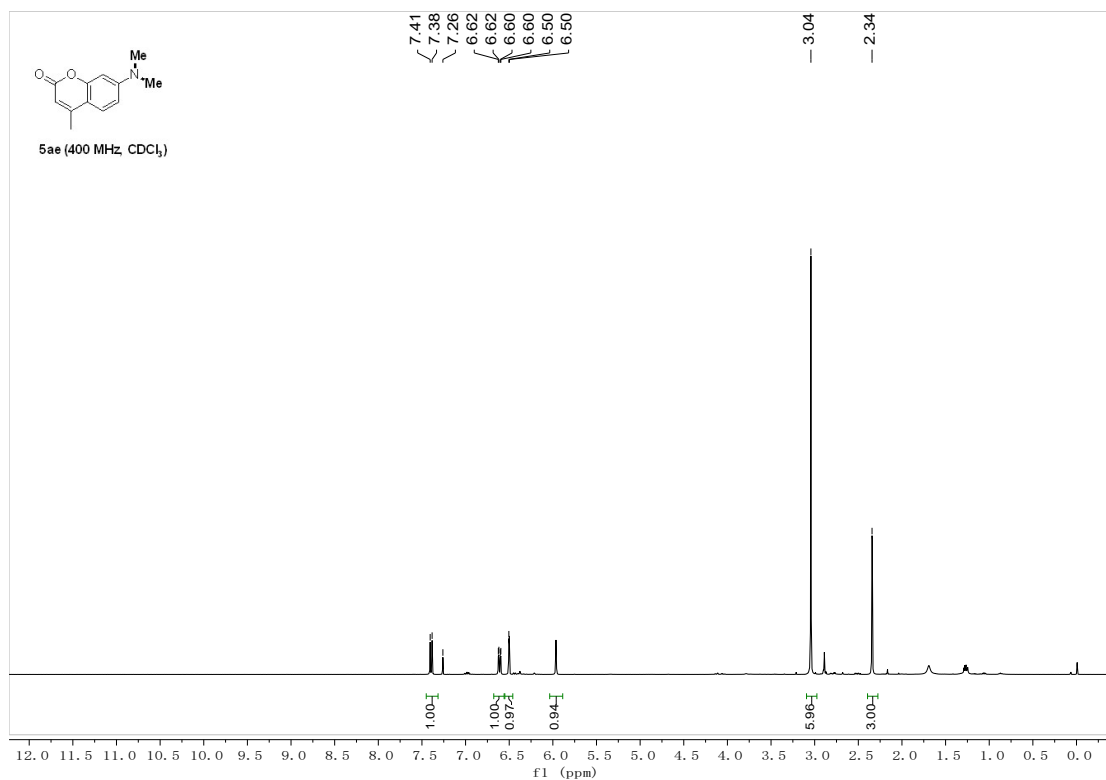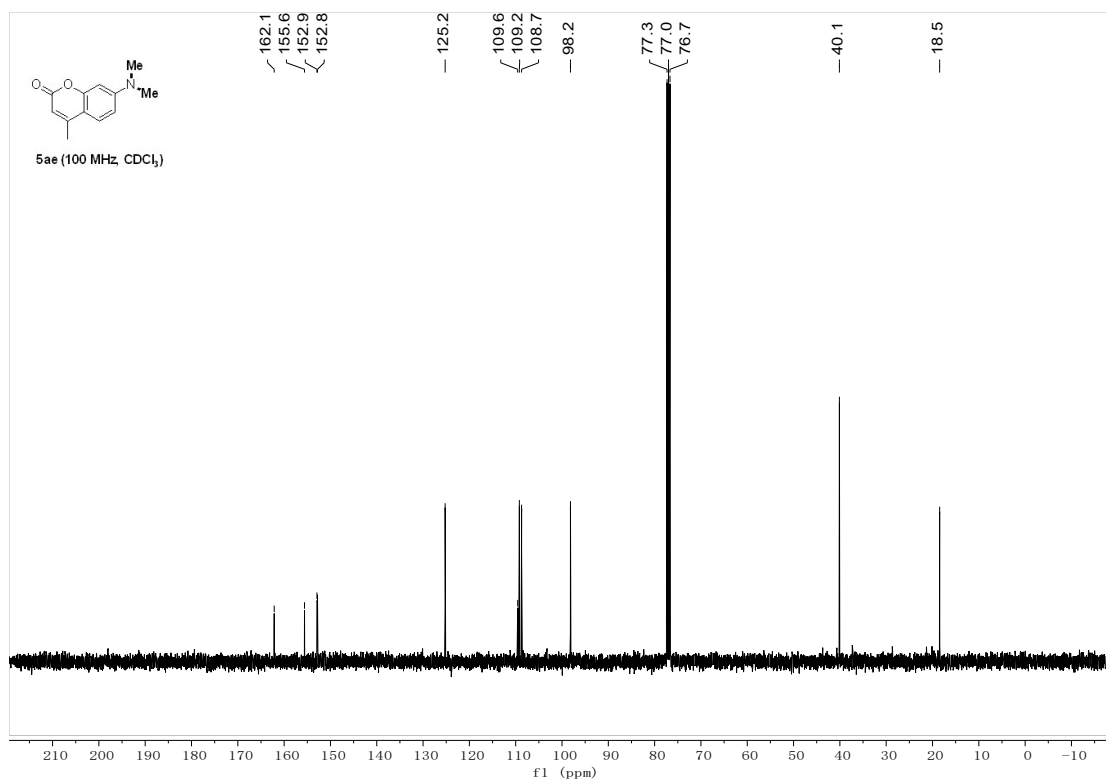



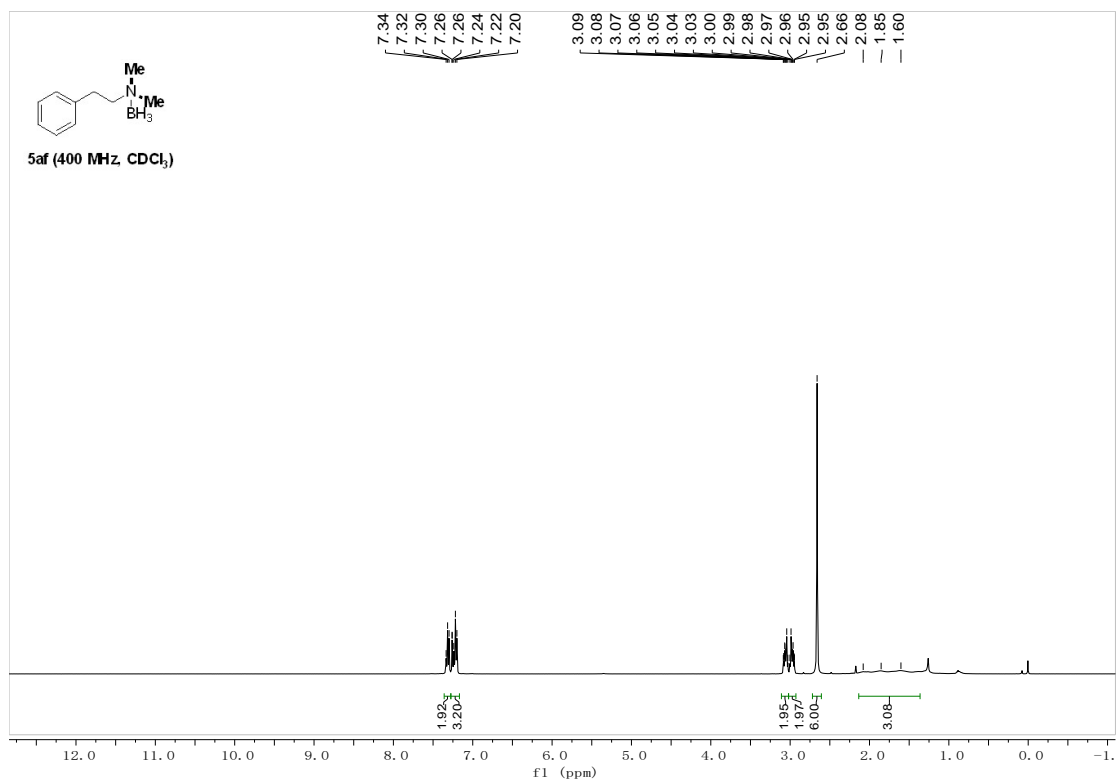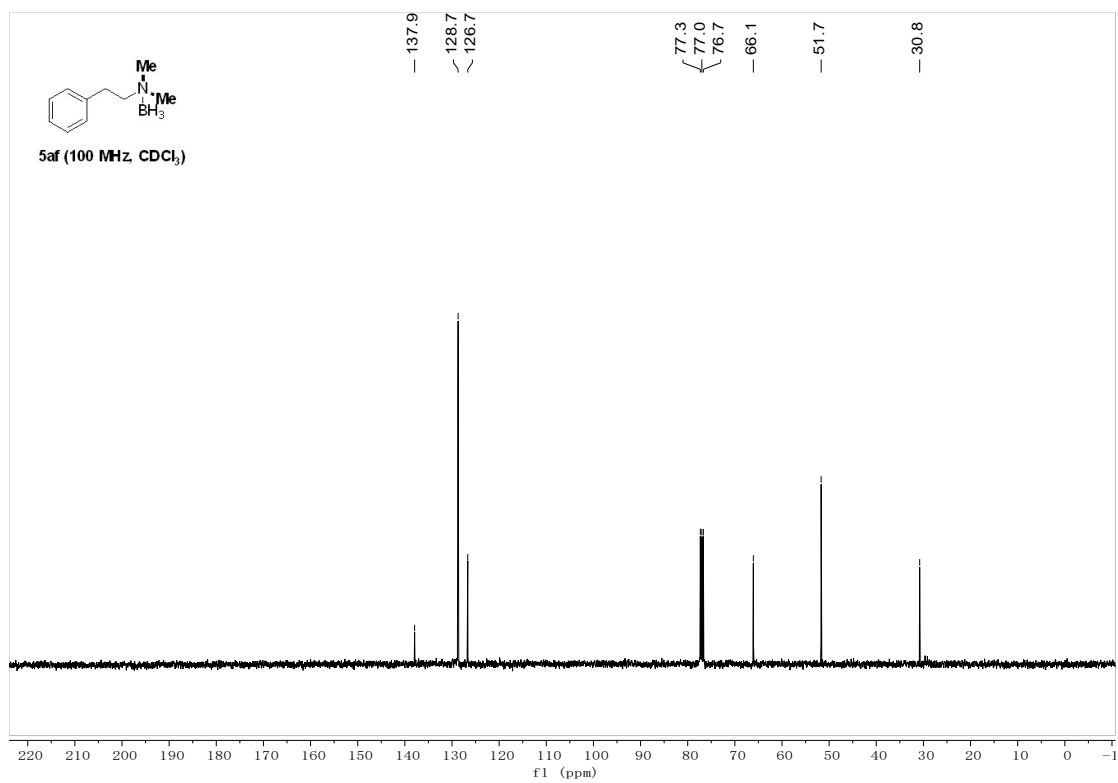

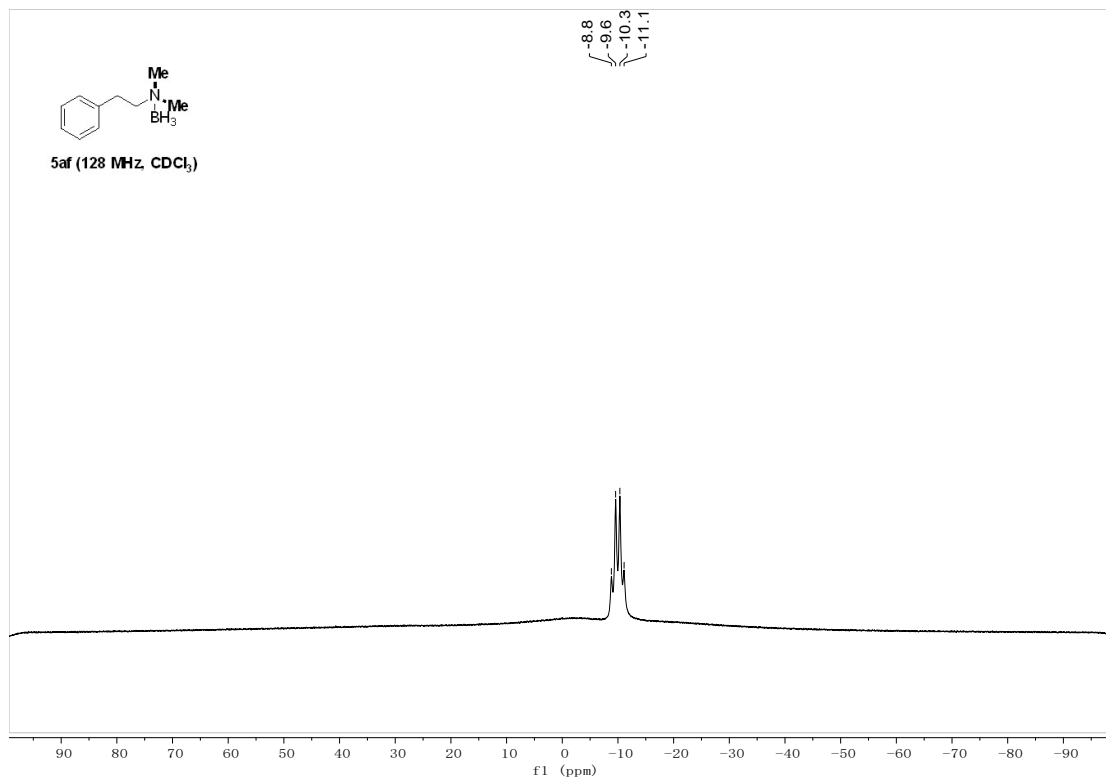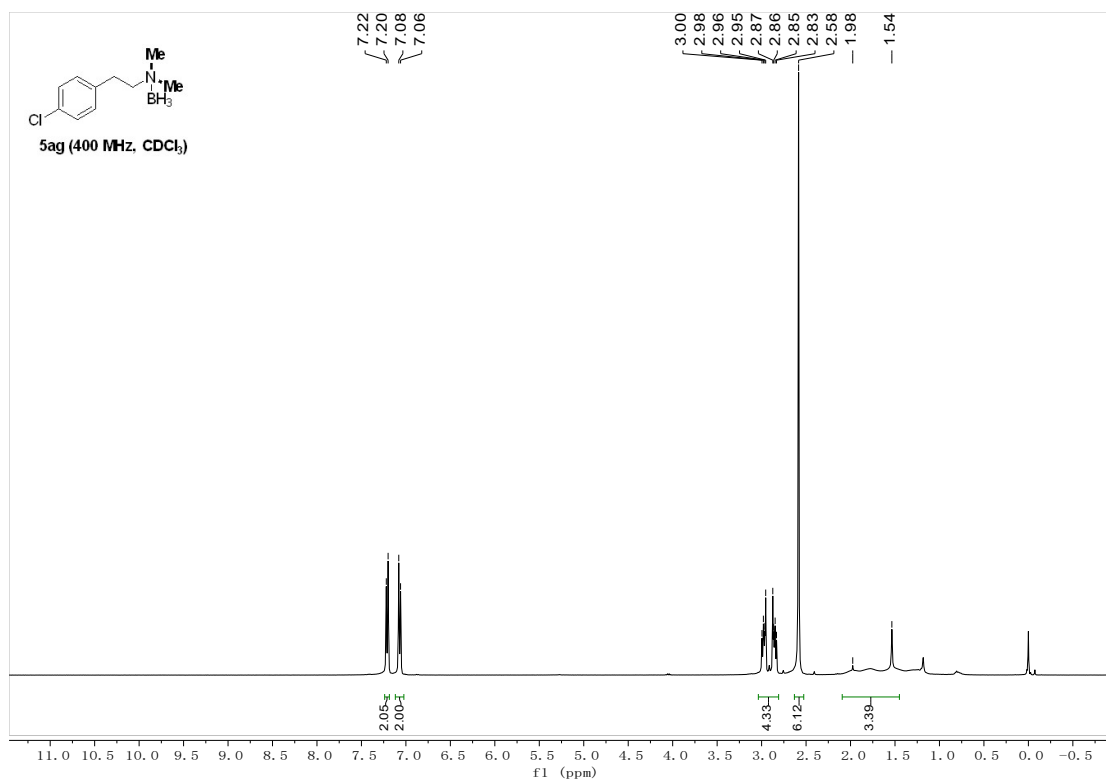

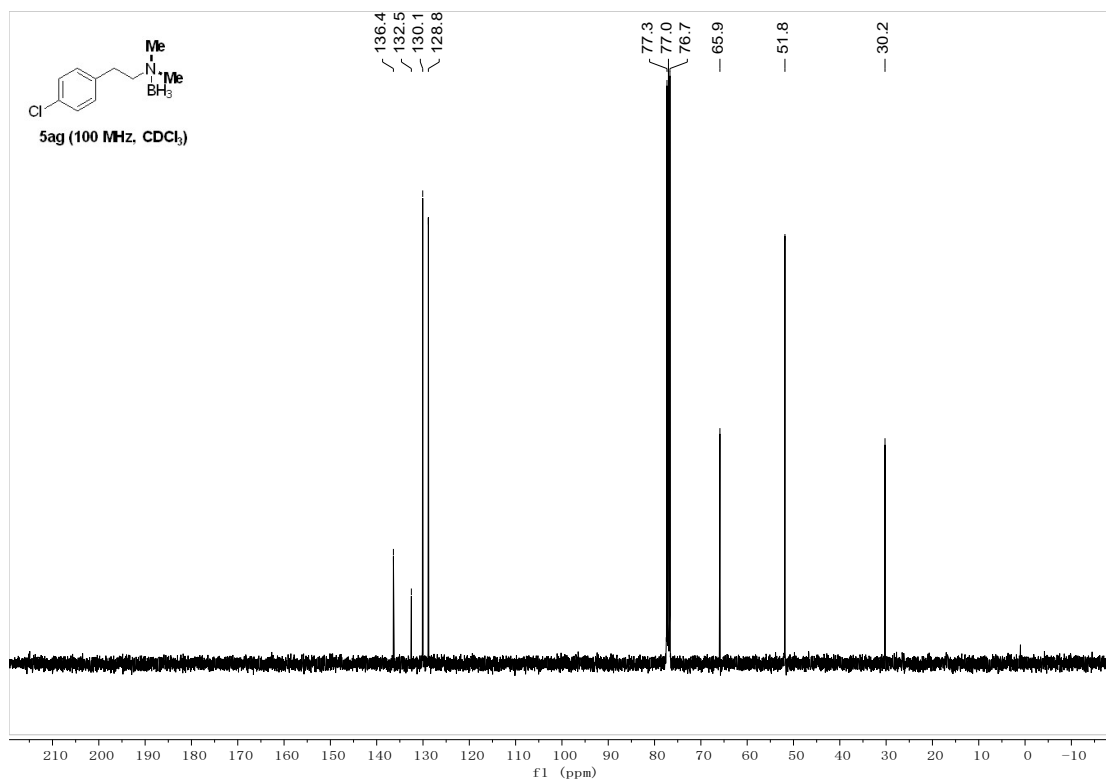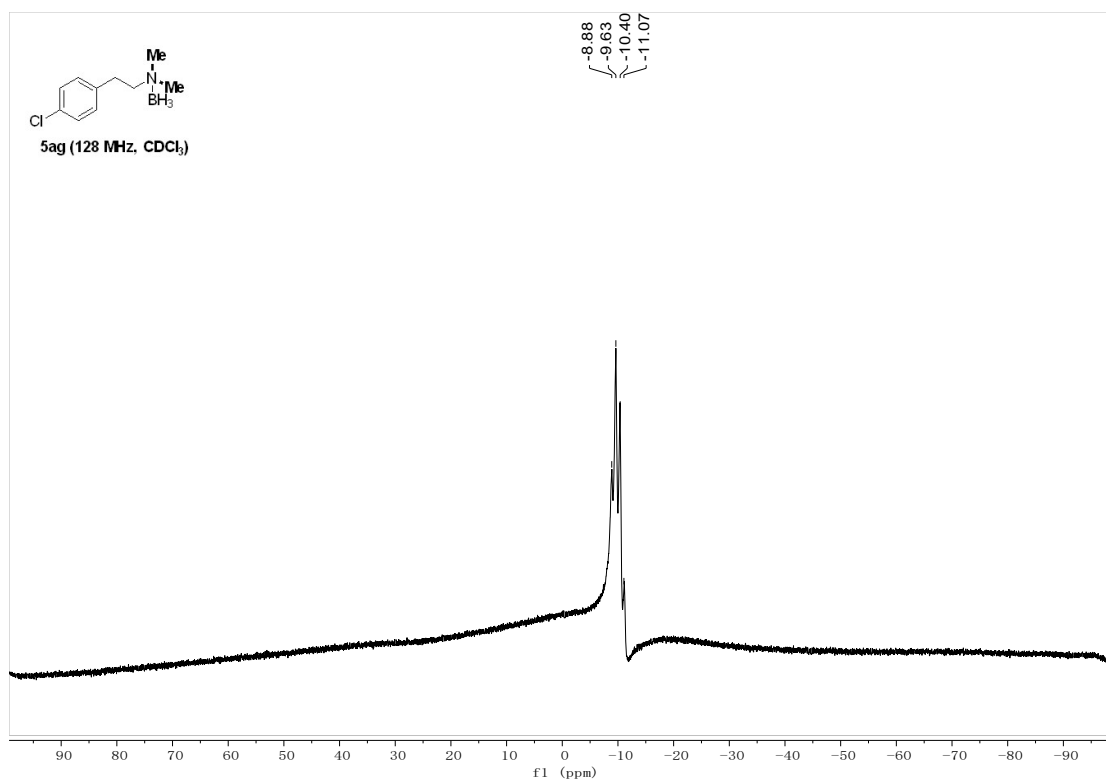

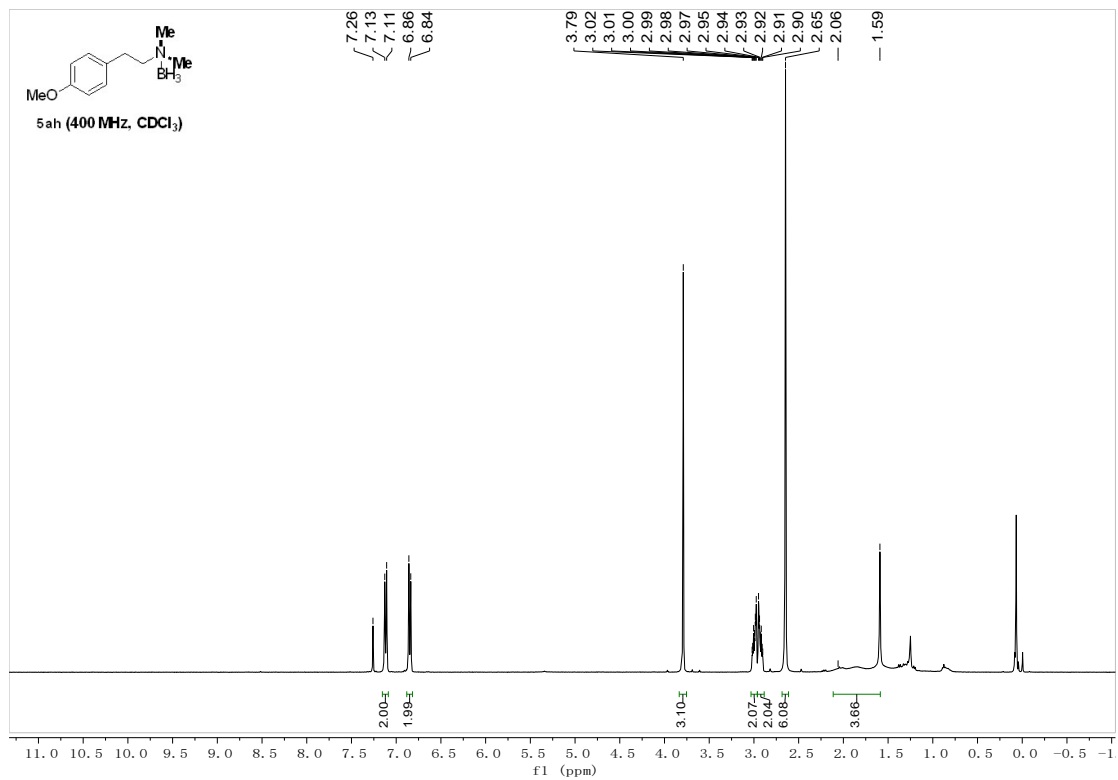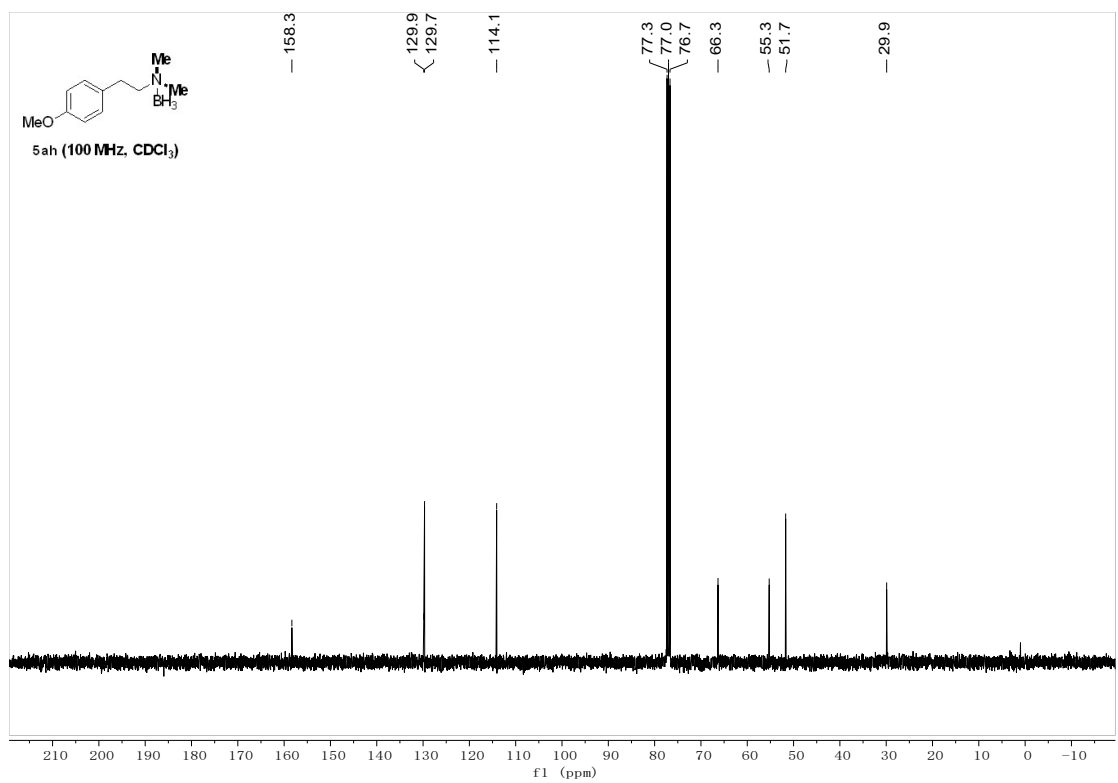

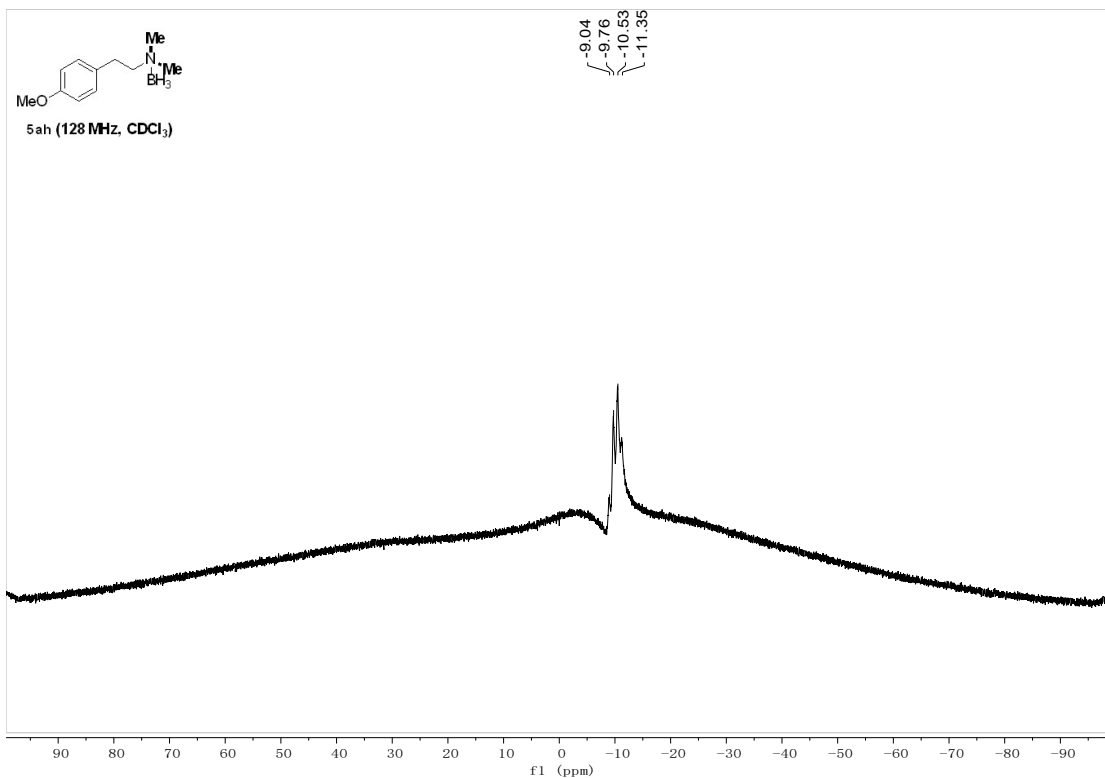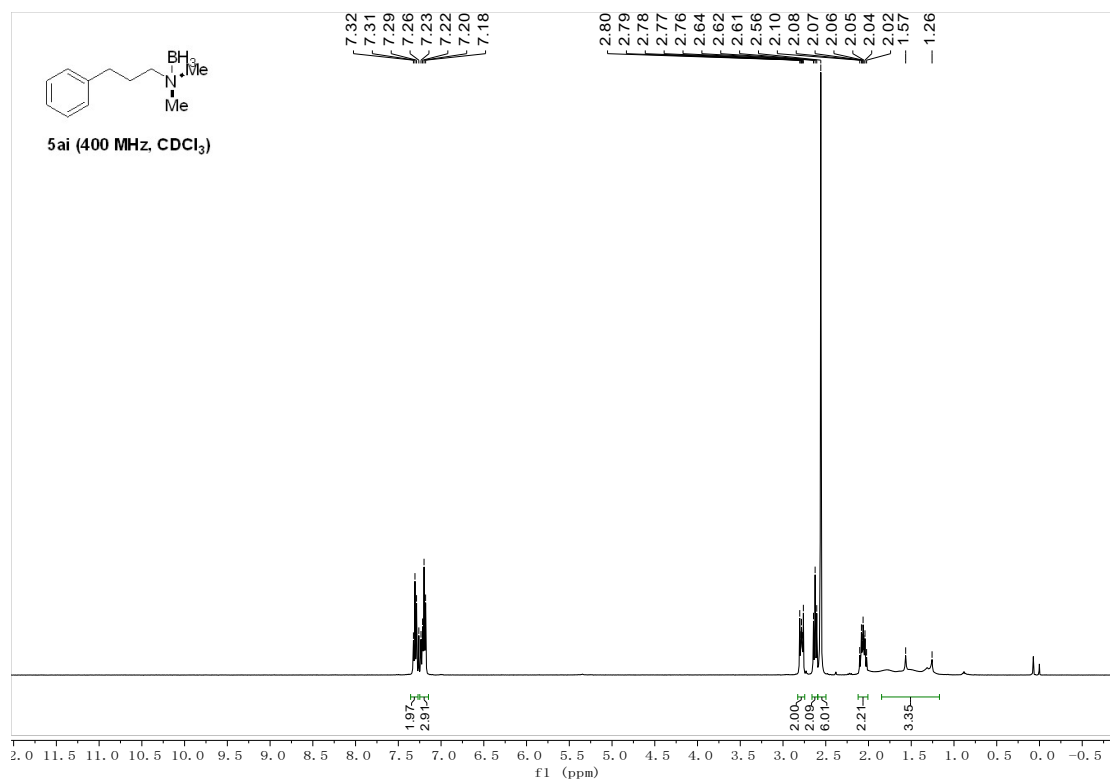

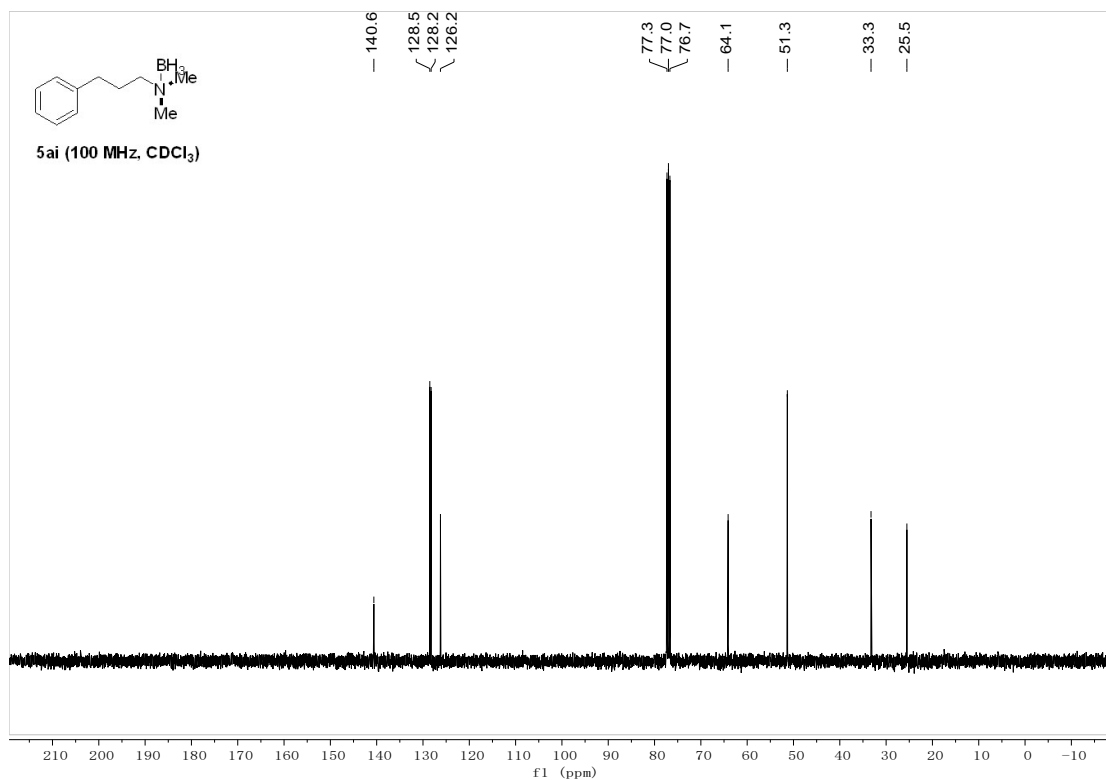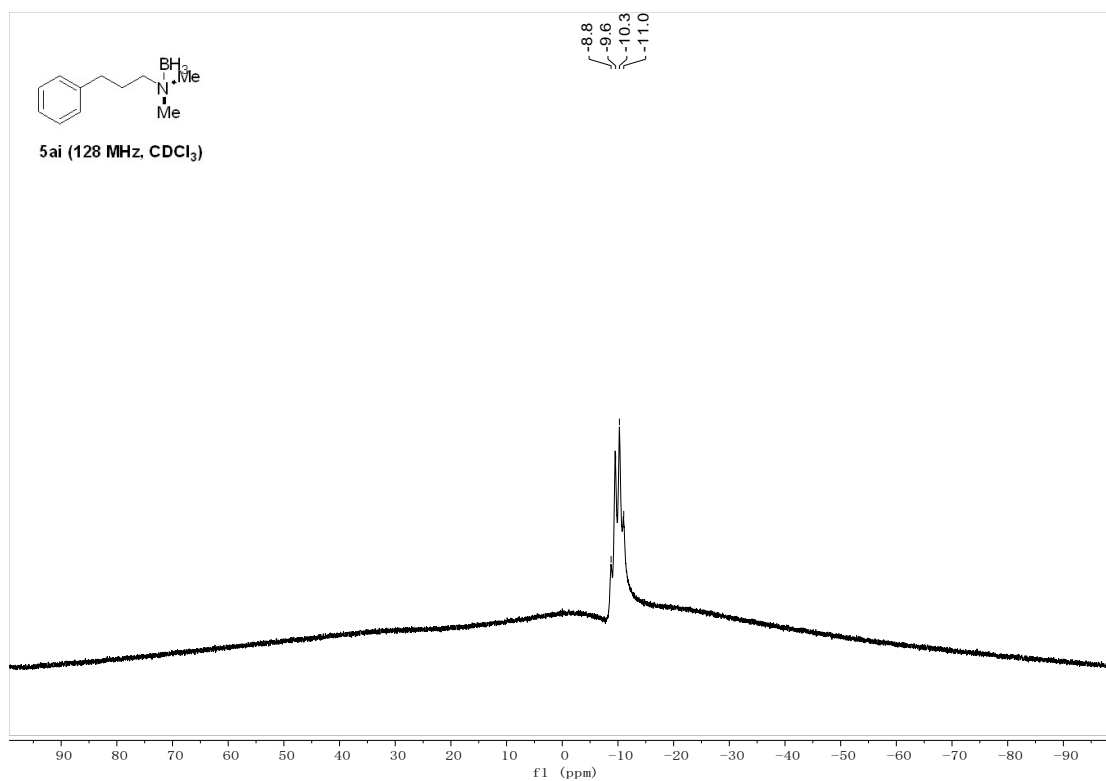

Supplement: d3qo00058c2.pdf [file d3qo00058c2.pdf]
