# Supplementary material for: DIC–borane-catalyzed selective methylation of primary amines with CO2 using boranes as reducing agents
Source: Royal Society of Chemistry journal article supplement (doi:10.1039/d3qo00058c), 2023-01-01
Supplement: d3qo00058c1.pdf [file d3qo00058c1.pdf]

substrate scope and poor selectivity, which hampers the wide application of this synthetically useful transformation.

To develop a sustainable, economical, and easy-to-handle procedure for CO<sub>2</sub> transformation, our group has investigated cheap and readily available organocatalysts for CO<sub>2</sub> activation under mild conditions.<sup>9</sup> Thus, 2-amino-6-picoline–borane<sup>9b</sup> and 2-aminothiazole–borane<sup>9c</sup> catalytic systems were developed for the reductive methylation of amines with CO<sub>2</sub>. In our previous study, we found that different borane-amine complexes exhibit different selectivities for the production of formylated or methylated amines. These results motivated us to extend this unique reactivity and reductive ability to the selective reduction of CO<sub>2</sub> using primary amines. Herein, we report for the first time that non-metal catalytic systems realize the selective monomethylation and dimethylation of primary amines using 1 atm CO<sub>2</sub> in the presence of different borane complexes. A catalytic amount of *N,N'*-diisopropylcarbodiimide (**DIC**) was used in these reactions. Monomethylated amines were obtained in the presence of borane–piperazine complexes, and dimethylated amines were obtained in the presence of borane–trimethylamine complexes (Scheme 1c).

Based on the frustrated Lewis pair (FLP) catalysts developed in our previously study, various heteroaromatic amines were selected for the reductive functionalization of CO<sub>2</sub> with aniline in the presence of the BH<sub>3</sub>·piperazine complex, which was generated in situ from BH<sub>3</sub>·SMe<sub>2</sub> and piperazine **B1** in toluene at 95 °C (Table 1). Interestingly, the mono-methylated product **3a** was selectively obtained in low yields using 2-aminopyridine (**I**) or 2-aminothiazole (**III**) as the catalyst (entries 1 and 3). The use of 6-amino-2-picoline (**II**) significantly enhanced the conversion and improved the yield of **3a** to 51% with excellent selectivity (entry 2). Furthermore, **DIC**<sup>10</sup> was used as a catalyst to efficiently produce **3a** in 86% yield with high selectivity (entry 4). We propose that the hydroboration of **DIC** with borane is much faster than the dehydrogenation of heteroamines (**I**, **II**, and **III**) with borane, generating an FLP catalyst in situ to

accelerate the reaction. However, the same type of catalyst, *N,N'*-dicyclohexylcarbodiimide (**DCC**), dramatically decreased the yield of **3a** to 21% (entry 5). Next, the use of various boranes was investigated for the reductive methylation reactions. The borane–trimethylamine complex, an efficient reducing agent for CO<sub>2</sub> reduction, resulted in the good conversion of aniline but with low selectivity, affording a mixture of formanilide (**2a**), **3a**, *N*-methyl-formanilide (**4a**), and *N,N*-dimethylaniline (**5a**) (entry 6). The use of pinacolborane (HBpin) as a reducing agent promoted the reaction, affording **3a** in 11% yield, along with **5a** in 1% yield (entry 7). Because the borane-amine complexes could be generated in situ from BH<sub>3</sub>·SMe<sub>2</sub> and amines, several amines were screened with BH<sub>3</sub>·SMe<sub>2</sub> (entries 8–10). For instance, a mixture of products was obtained in the presence of *N,N,N',N'*-tetramethylethylenediamine (**B2**) (entry 8). Intriguingly, the use of 1-methylpiperazine (**B3**) or 1,4-dimethylpiperazine (**B4**) as bases resulted in different selectivities. Mono-functionalized anilines **2a** and **3a** were obtained with **B3** (entry 9), whereas di-functionalized anilines **4a** and **5a** were obtained with **B4** (entry 10). The solvent screening results revealed that only aromatic and ether solvents promoted the reaction, while other solvents such as glyme, 1,2-dichloroethane (DCE), *N,N*-dimethylformamide (DMF), and dimethyl sulfoxide (DMSO) completely thwarted the reaction. The use of 1,4-dioxane yielded **3a** in 56% yield with high selectivity (entry 11); however, the use of THF afforded **2a** as the sole product in 35% yield (entry 12). These results indicate that the solvents might affect the reducibility of the borane complexes. Control experiments revealed that both **DIC** and **B1** were crucial for this reaction (entries 13 and 14). In addition, **DIC** exhibited a much higher efficiency for reductive dimethylation, affording **5a** in 95% yield using only 4 equiv. of BH<sub>3</sub>·NMe<sub>3</sub> under 1 atm CO<sub>2</sub> in glyme at 100 °C for 6 h (entry 15). However, when the same reaction was catalyzed by 6-amino-2-picoline, excess boranes (6 equiv. BH<sub>3</sub>·NMe<sub>3</sub>) and a longer reaction time (24 h) were required.<sup>9b</sup>

Table 1. Optimization of reductive methylation of aniline with CO<sub>2</sub>.<sup>a</sup>

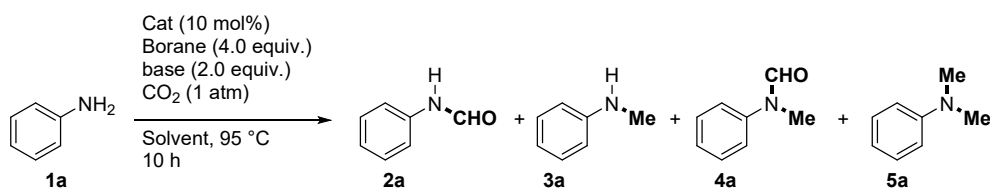

| Entry           | Catalyst   | Borane                            | Base      | Solvent     | Yield of <b>2a</b> /% | Yield of <b>3a</b> /% | Yield of <b>4a</b> /% | Yield of <b>5a</b> /% |
|-----------------|------------|-----------------------------------|-----------|-------------|-----------------------|-----------------------|-----------------------|-----------------------|
| 1               | <b>I</b>   | BH <sub>3</sub> ·SMe <sub>2</sub> | <b>B1</b> | Toluene     | -                     | 9                     | -                     | -                     |
| 2               | <b>II</b>  | BH <sub>3</sub> ·SMe <sub>2</sub> | <b>B1</b> | Toluene     | -                     | 51                    | -                     | -                     |
| 3               | <b>III</b> | BH <sub>3</sub> ·SMe <sub>2</sub> | <b>B1</b> | Toluene     | -                     | 4                     | -                     | -                     |
| 4               | <b>DIC</b> | BH <sub>3</sub> ·SMe <sub>2</sub> | <b>B1</b> | Toluene     | -                     | 86                    | -                     | -                     |
| 5               | <b>DCC</b> | BH <sub>3</sub> ·SMe <sub>2</sub> | <b>B1</b> | Toluene     | -                     | 21                    | -                     | -                     |
| 6               | <b>DIC</b> | BH <sub>3</sub> ·NMe <sub>3</sub> | -         | Toluene     | 28                    | 6                     | 23                    | 31                    |
| 7               | <b>DIC</b> | HBpin                             | -         | Toluene     | -                     | 11                    | -                     | 1                     |
| 8               | <b>DIC</b> | BH <sub>3</sub> ·SMe <sub>2</sub> | <b>B2</b> | Toluene     | 16                    | 17                    | 21                    | 39                    |
| 9               | <b>DIC</b> | BH <sub>3</sub> ·SMe <sub>2</sub> | <b>B3</b> | Toluene     | 14                    | 32                    | -                     | -                     |
| 10              | <b>DIC</b> | BH <sub>3</sub> ·SMe <sub>2</sub> | <b>B4</b> | Toluene     | -                     | -                     | 11                    | 42                    |
| 11              | <b>DIC</b> | BH <sub>3</sub> ·SMe <sub>2</sub> | <b>B1</b> | 1,4-Dioxane | -                     | 56                    | -                     | -                     |
| 12              | <b>DIC</b> | BH <sub>3</sub> ·SMe <sub>2</sub> | <b>B1</b> | THF         | 35                    | -                     | -                     | -                     |
| 13              | <b>DIC</b> | BH <sub>3</sub> ·SMe <sub>2</sub> | -         | Toluene     | -                     | -                     | -                     | -                     |
| 14              | -          | BH <sub>3</sub> ·SMe <sub>2</sub> | <b>B1</b> | Toluene     | -                     | -                     | -                     | -                     |
| 15 <sup>b</sup> | <b>DIC</b> | BH <sub>3</sub> ·NMe <sub>3</sub> | -         | Glyme       | -                     | -                     | -                     | 95                    |

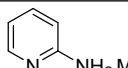

**I**

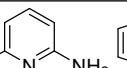

**II**

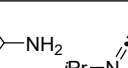

**III**

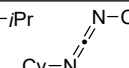

**DIC**

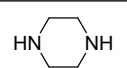

**DCC**

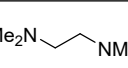

**B1**

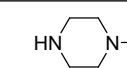

**B2**

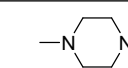

**B3**

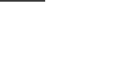

**B4**

<sup>a</sup> Reaction conditions: The reaction was carried out on a 0.3 mmol scale in 0.4 mL of solvent in a closed 20 mL Schlenk tube for 6 h; the yield was determined by GC with tridecane as the internal standard. HBpin = pinacolborane <sup>b</sup> in 0.2 mL solvent at 100 °C for 6 h.

With the optimized monomethylation conditions in hand, we explored the scope of various amines in this reaction (Table 2). The reactions displayed significant selectivity, in that only mono-methylated anilines were produced. Anilines bearing alkyl groups at the *para* (**3b**, **3c**, and **3d**) and *meta* (**3p**) positions were reacted with CO<sub>2</sub> to afford monomethylated amines in modest to good yields. Functional groups such as methoxyl (**3e** and **3o**), thiomethyl (**3f**), *N,N*-dimethylamino (**3g**), and methylenedioxy (**3q**) were well tolerated. Anilines bearing halide groups and pinacol boronate ester (Bpin) groups, which are frequently used for diverse latent coupling transformations, reacted with CO<sub>2</sub> to afford mono-methylated products in moderate-to-good yields (**3h–3k**, **3n**). In addition, the monomethylation of 4-bromoaniline could be scale up to 5 mmol scale to produce **3j** in 44% yield. Heterocycles such as pyrrole (**3r**), benzothiazole (**3s**), and dibenzofuran (**3t**) also participated in the reaction, affording the corresponding products in good yields. Moreover, 1-naphthylamine was reacted with CO<sub>2</sub> to afford **3u** in 50% yield. However, aliphatic amines did not react with CO<sub>2</sub> under these conditions.

Table 2. Monomethylation of amines with CO<sub>2</sub><sup>a</sup>

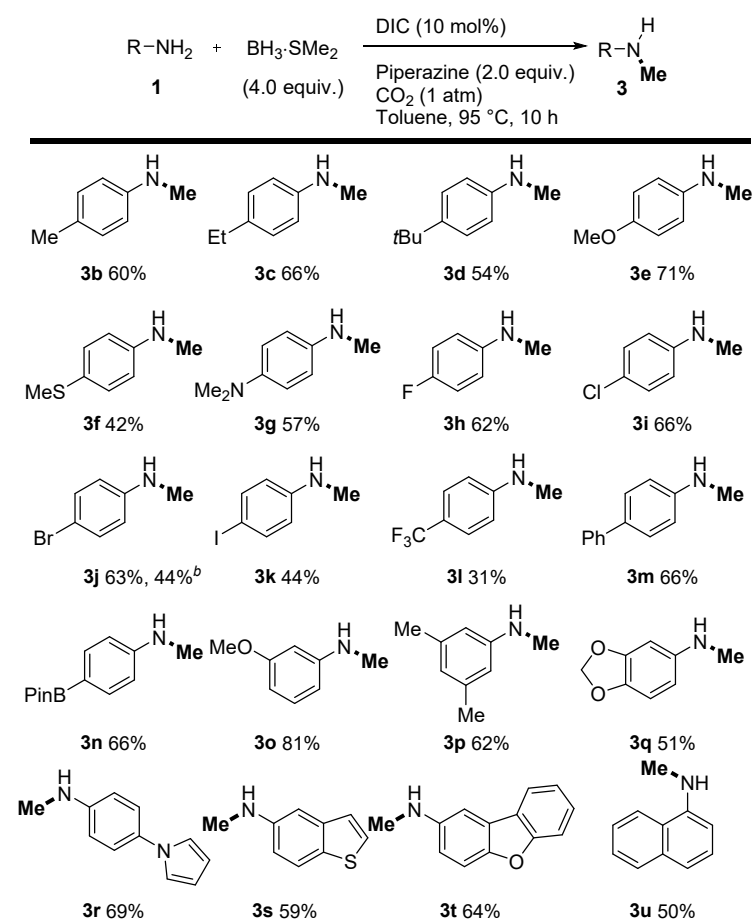

<sup>a</sup> Reaction conditions: The reaction was carried out on a 0.3 mmol scale in Toluene with a CO<sub>2</sub> balloon. <sup>b</sup> in 5 mmol scale for 72 h.

Subsequently, we evaluated the DIC-catalyzed dimethylation of anilines with CO<sub>2</sub> in the presence of the borane–trimethylamine complex (Table 3). The dimethylation reactions of electron-rich and electron-deficient anilines proceeded efficiently, affording the desired dimethylated products in good to excellent yields (**5b–5u**). A wide range of functional groups, such as methoxy (**5e**), thiomethyl (**5f**), halides (**5h–5k**, **5z**, **5aa**), nitro (**5v**), cyano (**5w**), ester (**5x**), free alcohol (**5y**), and Bpin (**5n**), were well tolerated. In most cases, only dimethylated products were obtained with high selectivity. Notably, the scale-up reaction of 4-bromoaniline afforded **5j** in 64% yield. An excess amount of borane trimethylamine complex is required in the case of anilines bearing Lewis basic functional groups because of the chelating character of Lewis acidic borane. The steric hindrance of anilines did not affect the reaction efficiency because *meta*-bromoaniline and *ortho*-bromoaniline reacted smoothly to afford the *N,N*-dimethylanilines **5z** and **5aa** in 80% and 81% yields, respectively. Furthermore, heteroarenes reacted efficiently with CO<sub>2</sub> to yield products **5r–5t** and **5ab–5ae**). The present DIC–borane catalytic system was further used for the post-modification of Imiquimod, which shows efficacy against tumors, affording the demethylated product **5ad** in 63% yield.<sup>[11]</sup> 7-Amino-4-methylcoumarin reacted with CO<sub>2</sub> to afford **5ae**, which could potentially be used as an organic donor-acceptor molecule with antibacterial activity.<sup>12</sup> The reaction of various aliphatic amines also afforded the corresponding products **5af–5ai** in good yields.

Table 3. Dimethylation of amines with CO<sub>2</sub>.<sup>a</sup>

| $\text{R-NH}_2 + \text{BH}_3\cdot\text{NMe}_3 \xrightarrow[\text{glyme, 100 } ^\circ\text{C, 6 h}]{\text{DIC (10 mol\%)}, \text{CO}_2 \text{ (1 atm)}} \text{R-N(Me)}_2$ |                                                                                                                       |
|--------------------------------------------------------------------------------------------------------------------------------------------------------------------------|-----------------------------------------------------------------------------------------------------------------------|
| 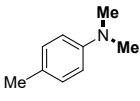<br><b>5b</b> 76% (85%)                                                                 | 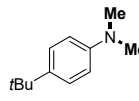<br><b>5d</b> 87%                   |
| 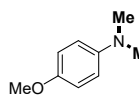<br><b>5e</b> 79%                                                                     | 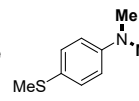<br><b>5f</b> 78%                  |
| 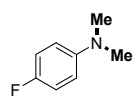<br><b>5h</b> 65% (77%)                                                                 | 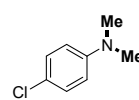<br><b>5i</b> 81%                   |
| 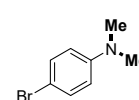<br><b>5j</b> 89%, 64% <sup>b</sup>                                                   | 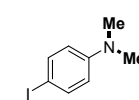<br><b>5k</b> 80%                  |
| 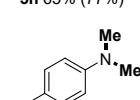<br><b>5l</b> 68%                                                                       | 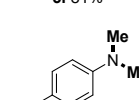<br><b>5v</b> 81%                   |
| 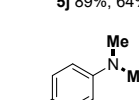<br><b>5w</b> 54% <sup>c,d</sup>                                                      | 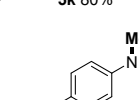<br><b>5x</b> 72% <sup>c,d</sup>   |
| 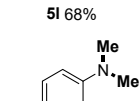<br><b>5y</b> 61% <sup>b,c</sup>                                                        | 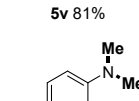<br><b>5m</b> 82%                   |
| 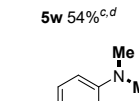<br><b>5n</b> 75% <sup>b,c</sup>                                                      | 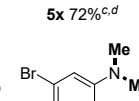<br><b>5z</b> 80%                  |
| 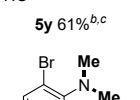<br><b>5aa</b> 81%                                                                      | 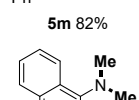<br><b>5u</b> 79%                   |
| 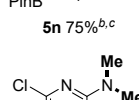<br><b>5ab</b> 80% <sup>c,d</sup>                                                     | 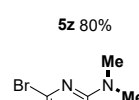<br><b>5ac</b> 76% <sup>c,d</sup>  |
| 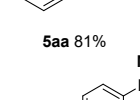<br><b>5r</b> 78% <sup>c,d</sup>                                                       | 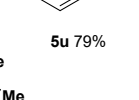<br><b>5s</b> 78% <sup>c,d</sup>   |
| 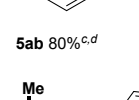<br><b>5t</b> 87% <sup>c,d</sup>                                                     |                                                                                                                       |
| 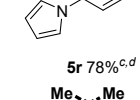<br><b>5ad</b> 63% <sup>e,f</sup>                                                     | 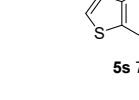<br><b>5ae</b> 44% <sup>c,d</sup> |
| 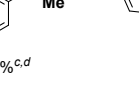<br><b>5af</b> 54% <sup>c,d</sup>                                                   |                                                                                                                       |
| 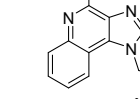<br><b>5ag</b> 62%                                                                    | 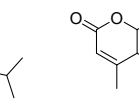<br><b>5ah</b> 65%                |
| 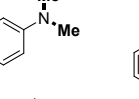<br><b>5ai</b> 55%                                                                  |                                                                                                                       |

<sup>a</sup> Reaction conditions: The reaction was carried out on a 0.3 mmol scale in glyme with a CO<sub>2</sub> balloon. NMR yield is shown in parenthesis. <sup>b</sup> in 5 mmol scale for 72 h. <sup>c</sup> 12 h. <sup>d</sup> 6 equiv. of BH<sub>3</sub>·NMe<sub>3</sub>. <sup>e</sup> 8 equiv. of BH<sub>3</sub>·NMe<sub>3</sub>. <sup>f</sup> 24 h.

To gain insight into the reaction mechanism, a series of control and mechanistic experiments were performed (Scheme 2). First, intermediates **IV** and **V** were detected by HRMS for the reactions of DIC with the borane–trimethylamine/borane–piperazine complexes and CO<sub>2</sub>, respectively (Scheme 2a). Based on our previous work on intramolecular FLPs catalysts for CO<sub>2</sub> activation, we assumed that **IV** and **V** were the key intermediates for CO<sub>2</sub> activation. Furthermore, to identify the reaction intermediates, the reactions of **2a** were performed under both reaction conditions. The desired product *N*-methylaniline **3a** was obtained along with aniline **1a**<sup>[13]</sup> under both reaction conditions (Scheme 2b).

Notably, the reductive conversion of **2a** is more efficient under mono-methylation conditions. A similar reactivity was also observed in the reaction of **4a** (Scheme 2d). These results reveal that the formation of formanilide **2a** might be the rate-determining step under the mono-methylation conditions because of the fast reduction of **2a**. Most importantly, the reaction of **3a** only produced **5a** in 4% yield under the mono-methylation conditions (Scheme 2c), indicating that the sterically encumbered *N*-methylanilines and borane–piperazine complex hindered the reductive coupling reaction of **3a** with CO<sub>2</sub>. Therefore, we conclude that the steric effects of the anilines and the borane–piperazine complex is the major reason for the selective mono-methylation of primary amines. But we also cannot exclude the possibility of solvent effect on the selectivity. By comparing the dimethylation results shown in Scheme 3b–d, the reductive coupling of **3a** with CO<sub>2</sub> efficiently afforded **5a** in 92% yield (Scheme 2c), while the reduction of **2a** and **4a** was much slower, indicating that formanilides **2a** and **4a** might not be the intermediates for the dimethylation reaction.

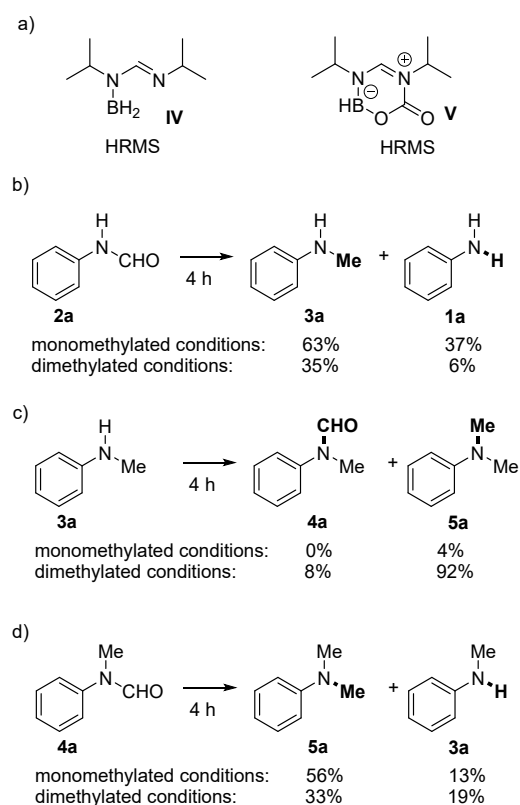

Scheme 2. Control experiments.

On the basis of the aforementioned mechanistic studies, we postulated a plausible reaction mechanism (Scheme 3). First, **DIC** reacts with borane *via* hydroboration to generate an active species **IV**, which acts as an intramolecular FLP to capture CO<sub>2</sub> to form the zwitterionic intermediate **V**. Meanwhile, aminoborane compound **VI**, which is generated from **1a** and borane through dehydrogenation, reacts with **V** to afford carbamoyl borate **VII** and releases the FLP catalyst **IV** to close the catalytic cycle. In the presence of the borane–piperazine complex, the reduction of **VII** affords formanilide **2a**; this

reduction reaction is the rate-determining step. **2a** could be quickly converted to mono-methylated amines **3a** and aniline. The monomethylated product could not react further with CO<sub>2</sub> because of the bulky borane–piperazine complex and **3a**. Under dimethylated conditions, we proposed that the borane–trimethylamine complex reduces **VII** to form formamide acetal-type intermediate **VIII**, which could also be reduced to **3a** and **1a**. **3a** was further reacted with CO<sub>2</sub> to afford dimethylated product **5a** in the presence of **IV** and the borane–trimethylamine complex.

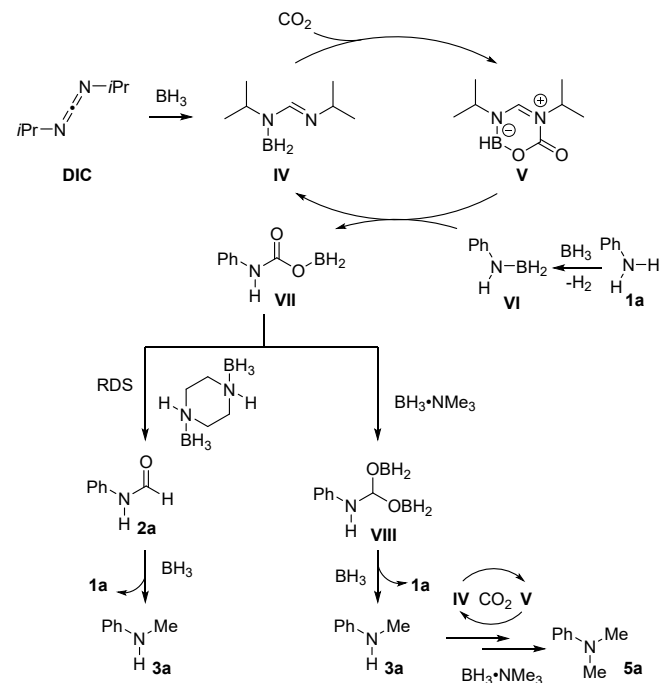Scheme 3. Proposed mechanism for the *N*-methylation and *N,N*-dimethylation reaction.

## Conclusions

In conclusion, the highly selective methylation of primary amines was achieved in the presence of the DIC–BH<sub>3</sub>–piperazine and DIC–BH<sub>3</sub>–NMe<sub>3</sub> catalytic systems. Diversely functionalized anilines were mono-methylated and di-methylated in good yields and high selectivity. Mechanistic studies indicate that the selectivity of the reaction is mainly controlled by the sterically demanding structures of anilines and borane complexes. The further expansion of the substrate scope of the present catalytic systems and mechanistic studies are currently ongoing.

## Author Contributions

H.Z. carried out the reactions and analysed the data. Y.Z. did preliminary experiments. K. G. designed and supervised the project. K. G. prepared the manuscript.

## Conflicts of interest

There are no conflicts to declare.

## Acknowledgements

We thank the NNSFC (No. 21702071) and the Fundamental Research Funds for the Central Universities (No. CCNU18QN012) for the financial support. The Program of Introducing Talents of Discipline to Universities of China (111 program, B17019) is also acknowledged. We also thank Prof. Naohiko Yoshikai for his helpful discussion and suggestions on the preparation of the manuscript.

## Notes and references

- For Selected reviews, see: a) K. Beydoun, J. Klankermayer, Recent Advances on CO<sub>2</sub> Utilization as C1 Building Block in C-N and C-O Bond Formation. *Top. Organomet. Chem.* 2018, **63**, 39-76; b) Cabrero-Antonino, J.; Adam, R.; Beller, M. Catalytic Reductive N-Alkylations Using CO<sub>2</sub> and Carboxylic Acid Derivatives: Recent Progress and Developments. *Angew. Chem. Int. Ed.* 2019, **58**, 12820-12838; c) X.-F. Liu, X.-Y. Li, L.-N. He, Transition Metal-Catalyzed Reductive Functionalization of CO<sub>2</sub>. *Eur. J. Org. Chem.* 2019, **2019**, 2437-2447; d) P. Sreejyothi, S. K. Mandal, From CO<sub>2</sub> activation to catalytic reduction: a metal-free approach. *Chem. Sci.* 2020, **11**, 10751-10593; e) S. Lin, J. Liu, L. Ma, A review on recent developments in N-methylation using CO<sub>2</sub>. *J. CO<sub>2</sub> Util.* 2021, **54**, 101759.
- For selected examples, see: a) C. D. N. Gomes, O. Jacquet, C. Villiers, P. Thuéry, M. Ephritikhine, T. Cantat. A Diagonal Approach to Chemical Recycling of Carbon Dioxide: Organocatalytic Transformation for the Reductive Functionalization of CO<sub>2</sub>. *Angew. Chem. Int. Ed.* 2012, **51**, 187; b) O. Jacquet, C. D. N. Gomes, M. Ephritikhine, T. Cantat. Recycling of Carbon and Silicon Wastes: Room Temperature Formylation of N-H Bonds Using Carbon Dioxide and Polymethylhydrosiloxane. *J. Am. Chem. Soc.* 2012, **134**, 2934-2937; c) S. Das, F. D. Bobbink, G. Laurenczy, P. J. Dyson, Metal-Free Catalyst for the Chemoselective Methylation of Amines Using Carbon Dioxide as a Carbon Source. *Angew. Chem. Int. Ed.* 2014, **53**, 12876-12879; d) X.-F. Liu, X.-Y. Li, C. Qiao, H.-C. Fu, L.-H. He, Betaine Catalysis for Hierarchical Reduction of CO<sub>2</sub> with Amines and Hydrosilane To Form Formamides, Amins, and Methylamines. *Angew. Chem. Int. Ed.* 2017, **56**, 7425-7429; e) X. Cui, Y. Zhang, Y. Deng, F. Shi, N-Methylation of amine and nitro compounds with CO<sub>2</sub>/H<sub>2</sub> catalyzed by Pd/CuZrOx under mild reaction conditions. *Chem. Commun.* 2014, **50**, 13521-13524; f) Y. Li, K. Junge, M. Beller, A General Catalytic Methylation of Amines Using Carbon Dioxide. *Angew. Chem. Int. Ed.* 2013, **52**, 9568-9571; g) X.-D. Li, S.-M. Xia, X.-H. Liu, H.-R. Li, L.-N. He, Copper catalysis: ligand-controlled selective N-methylation or N-formylation of amines with CO<sub>2</sub> and phenylsilane. *Green Chem.* 2018, **20**, 4853-4858.
- For selected examples, see: a) A. Kumar, P. Sharma, N. Sharma, Y. Kumar, D. Mahajan, Catalyst free N-formylation of aromatic and aliphatic amines exploiting reductive formylation of CO<sub>2</sub> using NaBH<sub>4</sub>. *RSC Adv.* 2021, **11**, 25777-25787. b) V. B. Saptal, G. Juneja, B. M. Bhanage, B(C<sub>6</sub>F<sub>5</sub>)<sub>3</sub>: a robust catalyst for the activation of CO<sub>2</sub> and dimethylamine borane for the N-formylation reactions. *New J. Chem.* 2018, **42**, 15847-15851; c) B. X. Leong, Y. C. Teo, C. Condamines, M. C. Yang, M. D. Su, C. W. So, A NHC-Silyliumylidene Cation for Catalytic N-Formylation of Amines Using Carbon Dioxide. *ACS Catal.* 2020, **10**, 14824-14833; d) H. Liu, Z. Nie, J. A. Shao, W. T. Chen, Y. P. Yu, Mild and facile synthesis of formamide: reduction and functionalization of CO<sub>2</sub> using NaBH(OAc)<sub>3</sub> under atmospheric pressure. *Green Chem.* 2019, **21**, 3552-3555; e) H. Lv, W. Wang, F. Li, Porous Organic Polymers with Built-in N-Heterocyclic Carbenes: Selective and Efficient Heterogeneous Catalyst for the Reductive N-Formylation of Amines with CO<sub>2</sub>. *Eur. Chem. J.* 2018, **24**, 16588-16594; f) S. Q. Zhang, Q. Q. Mei, H. Y. Liu, H. Z. Liu, Z. P. Zhang, B. X. Han, Copper-catalyzed N-formylation of amines with CO<sub>2</sub> under ambient conditions. *RSC Adv.* 2016, **6**, 32370-32373; g) J. Song, B. Zhou, H. Liu, C. Xie, Q. Meng, Z. Zhang, B. Han, Biomass-derived  $\gamma$ -valerolactone as an efficient solvent and catalyst for the transformation of CO<sub>2</sub> to formamides. *Green Chem.* 2016, **18**, 3956-3961; h) H. Lv, Q. Xing, C. Yue, Z. Lei, F. Li, Solvent-promoted catalyst-free N-formylation of amines using carbon dioxide under ambient conditions. *Chem. Commun.* 2016, **52**, 6545-6548; i) M. Hulla, F. D. Bobbink, S. Das, P. J. Dyson, Carbon Dioxide Based N-Formylation of Amines Catalyzed by Fluoride and Hydroxide Anions. *ChemCatChem* 2016, **8**, 3338-3342; k) C. Fang, C. L. Lu, M. H. Liu, Y. L. Zhu, Y. Fu, B. L. Lin, Selective Formylation and Methylation of Amines using Carbon Dioxide and Hydrosilane Catalyzed by Alkali-Metal Carbonates. *ACS Catal.* 2016, **6**, 7876-7881; j) S. Das, F. D. Bobbink, S. Bulut, M. Soudani, P. J. Dyson, Thiazolium carbene catalysts for the fixation of CO<sub>2</sub> onto amines. *Chem. Commun.* 2016, **52**, 2497-2500; k) L. D. Hao, Y. F. Zhao, B. Yu, Z. Z. Yang, H. Y. Zhang, B. X. Han, X. Gao, Z. M. Liu, Imidazolium-Based Ionic Liquids Catalyzed Formylation of Amines Using Carbon Dioxide and Phenylsilane at Room Temperature. *ACS Catal.* 2015, **5**, 4989-4993.
- a) Z. Huang, X. Jiang, S. Zhou, P. Yang, C. X. Du, Y. Li, Mn-Catalyzed Selective Double and Mono-N-Formylation and N-Methylation of Amines by using CO<sub>2</sub>. *ChemSusChem* 2019, **12**, 3054-3059; b) Q. Zhang, X. T. Lin, N. Fukaya, T. Fujitani, K. Sato, J. C. Choi, Selective N-formylation/N-methylation of amines and N-formylation of amides and carbamates with carbon dioxide and hydrosilanes: promotion of the basic counter anions of the zinc catalyst. *Green Chem.* 2020, **22**, 8414-8422; c) X. T. Lin, K. Matsumoto, Y. Maegawa, K. Takeuchi, N. Fukaya, K. Sato, S. Inagaki, J. C. Choi, Immobilized Zn(OAc)<sub>2</sub> on bipyridine-based periodic mesoporous organosilica for N-formylation of amines with CO<sub>2</sub> and hydrosilanes. *New J. Chem.* 2021, **45**, 9501-950.
- Amins only for secondary amines, see: a) X. Frogneux, E. Blondiaux, P. Thuery, T. Cantat, Bridging Amines with CO<sub>2</sub>: Organocatalyzed Reduction of CO<sub>2</sub> to Amins. *ACS Catal.* 2015, **5**, 3983-3987; b) C. Xie, J. Song, H. Wu, B. Zhou, C. Wu, B. Han, Natural Product Glycine Betaine as an Efficient Catalyst for Transformation of CO<sub>2</sub> with Amines to Synthesize N-Substituted Compounds. *ACS Sustain. Chem. Eng.* 2017, **5**, 7086-7092.
- a) O. Jacquet, X. Frogneux, C. Das Neves Gomes, T. Cantat, CO<sub>2</sub> as a C<sub>1</sub>-building block for the catalytic methylation of amines. *Chem. Sci.* 2013, **4**, 2127-2131; b) Y. Li, I. Sorribes, T. Yan, K. Junge, M. Beller, Selective Methylation of Amines with Carbon Dioxide and H<sub>2</sub>. *Angew. Chem. Int. Ed.* 2013, **52**, 12156-12160; c) X. J. Cui, X. C. Dai, Y. Zhang, Y. Q. Deng, F. Shi, Methylation of amines, nitrobenzenes and aromatic nitriles with carbon dioxide and molecular hydrogen. *Chem. Sci.* 2014, **5**, 649-655; d) Y. Wu, T. Wang, H. Wang, X. Wang, X. Dai, F. Shi, Active catalyst construction for CO<sub>2</sub> recycling via catalytic synthesis of N-doped carbon on supported Cu. *Nat. Commun.* 2019, **10**, 2599-2605;
- a) K. Beydoun, T. vom Stein, J. Klankermayer, W. Leitner, Ruthenium-Catalyzed Direct Methylation of Primary and Secondary Aromatic Amines Using Carbon Dioxide and Molecular Hydrogen. *Angew. Chem. Int. Ed.* 2013, **52**, 9554-9557; b) E. Blondiaux, J. Pouessel, T. Cantat, Carbon Dioxide Reduction to Methylamines under Metal-Free Conditions. *Angew. Chem. Int. Ed.* 2014, **53**, 12186-12190; c) X. L. Du, G. Tang, H. L. Bao, Z. Jiang, X. H. Zhong, D. S. Su, J. Q. Wang,

- Direct Methylation of Amines with Carbon Dioxide and Molecular Hydrogen using Supported Gold Catalysts. *ChemSusChem* 2015, **8**, 3489-3496; d) X. F. Liu, C. Qiao, X. Y. Li, L. N. He, Carboxylate-promoted reductive functionalization of CO<sub>2</sub> with amines and hydrosilanes under mild conditions. *Green Chem.* 2017, **19**, 1726-1731; e) M. Y. Wang, N. Wang, X. F. Liu, C. Qiao, L. N. He, Tungstate catalysis: pressure-switched 2- and 6-electron reductive functionalization of CO<sub>2</sub> with amines and phenylsilane. *Green Chem.* 2018, **20**, 1564-1570; f) C. Lu, Z. Qiu, Y. Zhu, B.-L. Lin, Scalable direct N-methylation of drug-like amines using <sup>12</sup>CO<sub>2</sub>/<sup>13</sup>CO<sub>2</sub> by simple inorganic base catalysis. *Sci. Bull.* 2019, **64**, 723-729.
- 8 For selected reviews, see: a) J. Chatterjee, F. Rechenmacher, H. Kessler, N-Methylation of Peptides and Proteins: An Important Element for Modulating Biological Functions. *Angew. Chem. Int. Ed.* 2013, **52**, 254-269; b) J. R. Cabrero-Antonino, R. Adam, M. Beller, Catalytic Reductive N-Alkylations Using CO<sub>2</sub> and Carboxylic Acid Derivatives: Recent Progress and Developments. *Angew. Chem. Int. Ed.* 2019, **58**, 12820-12838; c) M. Mindt, T. Walter, P. Kugler, V. F. Wendisch, Microbial engineering for production of N-functionalized amino acids and amines. *J. Biotechnol.* 2020, **15**, 1900451; d) K. Murugesan, T. Senthamarai, V. G. Chandrashekhar, K. Natte, P. C. J. Kamer, M. Beller, R. V. Jagadeesh, Catalytic reductive aminations using molecular hydrogen for synthesis of different kinds of amines. *Chem. Soc. Rev.* 2020, **49**, 6273-6328.
- 9 a) R. Wu, K. Gao, B(C<sub>6</sub>F<sub>5</sub>)<sub>3</sub>-catalyzed tandem protonation/deuteration and reduction of *in situ*-formed enamines. *Org. Biomol. Chem.* 2021, **19**, 4032-4036; b) Y. Zhang, H. Zhang, K. Gao, Borane-Trimethylamine Complex as a Reducing Agent for Selective Methylation and Formylation of Amines with CO<sub>2</sub>. *Org. Lett.* 2021, **23**, 8282-8286; c) F. Xiong, Q. Cheng, Y. Dang, K. Gao, A tandem reduction of primary amines, carbonyl compounds, CO<sub>2</sub>, and boranes catalyzed by *in situ* formed frustrated Lewis pairs. *Org. Chem. Front.* 2022, **9**, 4882-4889.
- 10 A. Ramos, A. Antinolo, F. Carrillo-Hermosilla, R. Fernandez-Galan, A. Rodriguez-Dieguez, D. Garcia-Vivo, Carbodiimides as catalysts for the reduction of CO<sub>2</sub> with boranes. *Chem. Commun.* 2018, **54**, 4700-4703.
- 11 M. P. Schön, M. Schön, Imiquimod: mode of action. *Brit. J. Dermatol.* 2007, **157**, 8-13.
- 12 a) C. A. Hoelzel, H. Hu, C. H. Wolstenholme, B. A. karim, K. T. Munson, K. H. Jung, H. Zhang, Y. Liu, H. P. Yennawar, J. B. Asbury, X. Li, X. Zhang, A General Strategy to Enhance Donor-Acceptor Molecules Using Solvent-Excluding Substituents. *Angew. Chem. Int. Ed.* 2020, **59**, 4785-4792; b) S. Duggirala, R. P. Nankar, S. Rajendran, M. Doble, Phytochemicals as Inhibitors of Bacterial Cell Division Protein FtsZ: Coumarins Are Promising Candidates. *Appl. Biochem. Biotechnol.* 2014, **174**, 283-296.
- 13 The reductive reaction of **2a** afforded aniline was reported by using NaBH<sub>4</sub> as a reducing agent, please see: J. G. Uranga, A. Gopakumar, T. Pfister, G. Imanzade, L. Lombardo, G. Gastelu, A. Züttel, P. J. Dyson, Methanol production from CO<sub>2</sub> via an integrated, formamide-assisted approach. *Sustain. Energ. Fuels* 2020, **4**, 1773-1779.
